# Supplementary material for: Chiral Recognition of Amino Acid Esters in Organic Solvents Using a Glucose-Based Receptor
Source: MDPI journal article supplement (doi:10.3390/molecules27072177), 2022-03-28
Supplement: s1 [file s1]

## **Supporting Information**

## Index

|                                                                                                       |    |
|-------------------------------------------------------------------------------------------------------|----|
| 1. Supplementary figures for the manuscript.                                                          | 3  |
| 2. Materials, methods and instruments.                                                                | 5  |
| 3. Characterisation of receptor 1 in CDCl <sub>3</sub> , CD <sub>3</sub> CN and DMSO-d <sub>6</sub> . | 6  |
| 4. Titration experiments monitored by <sup>1</sup> H NMR.                                             | 7  |
| 4.1 Titrations in CDCl <sub>3</sub> .                                                                 | 8  |
| 4.2 Titrations in CD <sub>3</sub> CN.                                                                 | 40 |
| 4.3 Titrations in DMSO-d <sub>6</sub> .                                                               | 60 |
| 5. NMR spectra of receptor 1.                                                                         | 80 |
| 6. NMR spectra of 1 + H-Val-OMe complexes in CDCl <sub>3</sub> .                                      | 89 |
| 7. HR MS spectrum of receptor 1.                                                                      | 92 |

## 1. Supplementary figures for the manuscript.

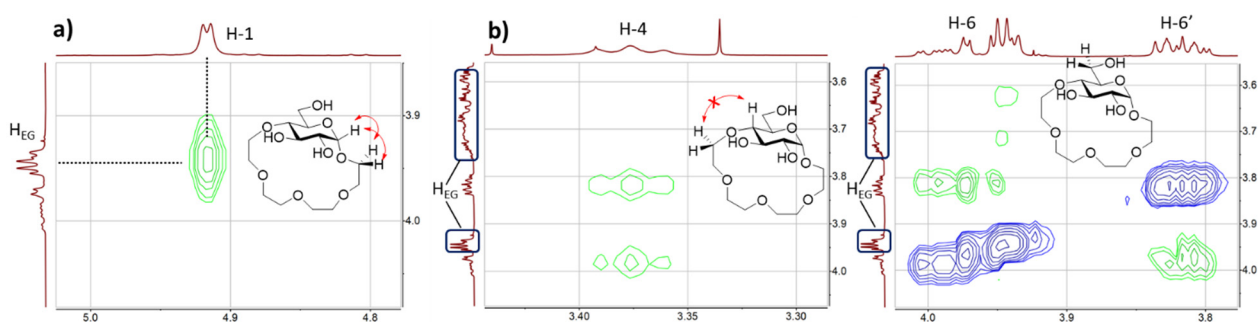

**Figure S1** Fragments of the NOESY spectrum of **1** in  $\text{CDCl}_3$ : a) NOE between H-1 and the adjacent ethylene glycol protons; b) lack of NOEs between H-4 or H-6 and the ethylene glycol protons.

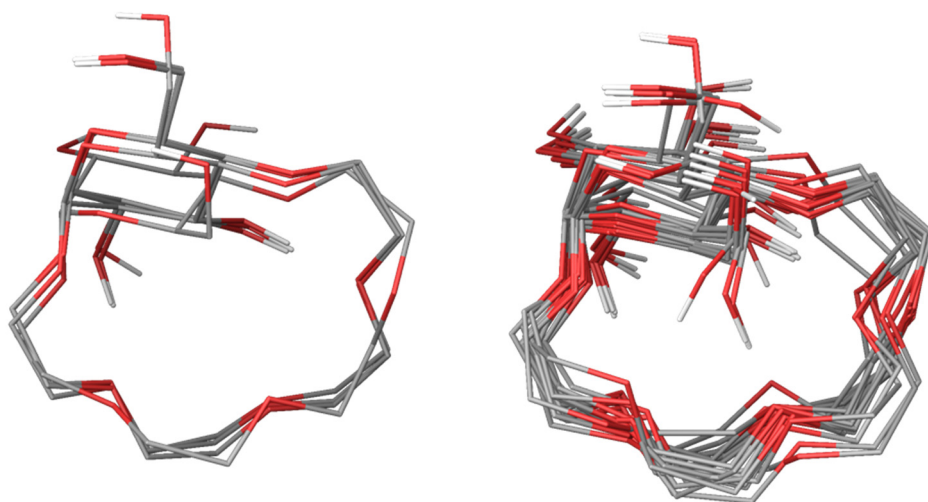

**Figure S2** Overlay of lowest energy conformers (within 1 kcal/mol window, left; within 2 kcal/mol window, right) of receptor **1** obtained using the OPLSe3 Force Field calculations using  $\text{CHCl}_3$  as solvent model.

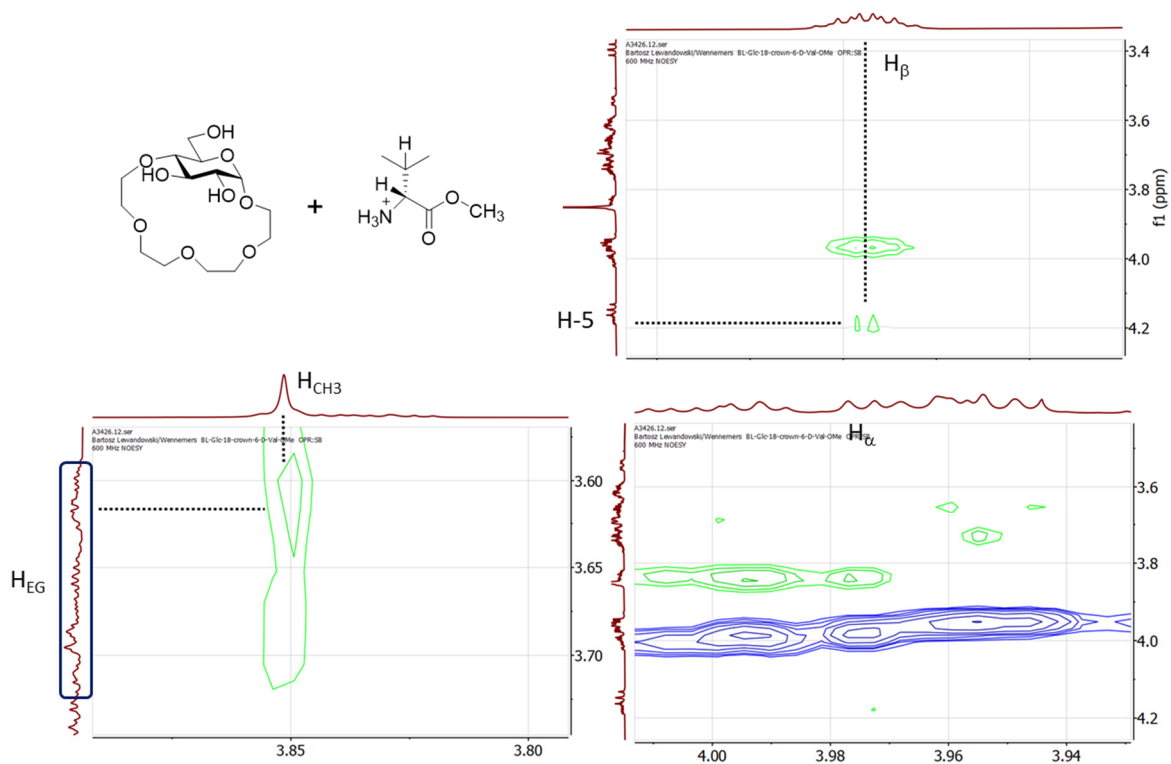

**Figure S3** Fragments of the NOE spectrum of the 1:1 complex between **1** and H-D-Val-OMe in CDCl<sub>3</sub> depicting: NOEs between H<sub>CH3</sub> of the guest and ethylene glycol protons of the host, bottom left; NOEs between H<sub>β</sub> of the guest and H-5 of the host, top right; lack of NOEs between H<sub>α</sub> of the guest and the host, bottom right.



## **2. Materials, methods and instruments**

### **Materials**

Solvents and reagents were of the highest commercially available grade and used without further purification. They were purchased from Sigma Aldrich, Fischer Scientific, Fluka, Bachem, BioMatrix, Biotage, IRIS Biotech, Protein Technologies and Acros Organics. Solvents used for MPLC were HPLC-grade quality.

### **Preparative medium pressure liquid chromatography (MPLC)**

Purifications of the building blocks were carried out on a CombiFlash EZ Prep flash chromatography system (Teledyne ISCO). Two different solvent sets were used: 1. Solvent A was HPLC-grade DCM without stabilizer and solvent B was HPLC-grade methanol; 2. Solvent A was HPLC-grade hexane and solvent B HPLC-grade EtOAc.

### **Thin-layer chromatography (TLC)**

TLC was conducted on aluminium sheets coated with silica gel 60 F<sub>254</sub> (Merck) using UV fluorescence (254 and 366 nm). Analytical grade solvents were used.

### **Liquid chromatography - mass spectrometry (LC - MS)**

Analytical reverse phase HPLC (RP-HPLC) was performed on a Dionex UHPLC, Ultimate 3000. Reprosil gold 120 C<sub>18</sub> (150 x 4 mm, 5  $\mu$ m) with a flow of 0.5 mL/min was used as the analytical column. Two different solvents were used. Solvent A was assigned to be pure acetonitrile and solvent B was a mixture of 1 % acetonitrile and 0.1 % TFA in Milli-Q pure water. The mass analysis was performed on an amaZone speed ion trap mass analyzer (Bruker, USA).

### **Nuclear magnetic resonance (NMR) spectroscopy**

1D and 2D NMR spectra were recorded on 400 and 500 MHz Ultrashield spectrometers (Bruker, USA). NMR chemical shifts ( $\delta_H$  and  $\delta_C$ ) are quoted in parts per million (ppm) and coupling constants (J) are quoted in Hertz (Hz). Abbreviations for NMR data are s (singlet), d (doublet), t (triplet), q (quartet), m (multiplet).

### **High-resolution mass spectrometry (HR-MS)**

High-resolution electrospray ionization (HR-ESI) spectra were measured on a Bruker maXis spectrometer.

### **Computational modelling**

Computational simulations were performed with the Schrodinger Maestro Suite (Program version 2020-2 for MacOS). A conformational search was carried out starting from a random input geometry of receptor **1**, using the Mixed-torsional/Low mode conformational sampling of MacroModel combined with OPLS3e force field minimization (GB/SA water solvation model). The conformational search was performed with 10000 steps and a 21kJ/mol (~ 5 kcal/mol) relative potential energy cut-off was applied (0.5 Å maximum atom deviation).

All resulting conformers within 21 kJ/mol (~ 5 kcal/mol) of the global minimum were clustered according to the RMSD of the heavy atoms. The structure closest to the centroid in each cluster was chosen as a representative conformation. Representative conformers in between ~ 2 kcal/mol were superimposed for structural comparison.

### 3. Characterisation of receptor 1 in CDCl<sub>3</sub>, CD<sub>3</sub>CN and DMSO-d<sub>6</sub>.

The receptor was synthesised according to a procedure described in ref.23.

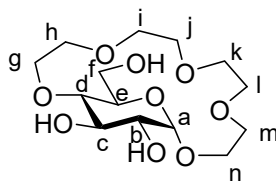

HR-ESI-MS:  $m/z$ : 361.1484  $[M + Na]^+$ , calculated for  $C_{14}H_{26}NaO_9^+$ : 361.1485

#### CDCl<sub>3</sub>:

$^1H$  NMR (600 MHz, CDCl<sub>3</sub>)  $\delta$  4.92 (d,  $J$  = 3.5 Hz, 1H, H<sub>a</sub>), 4.16 (m, 1H, H<sub>e</sub>), 4.13 (m, 1H, H<sub>c</sub>), 4.01 - 3.93 (m, 4H, H<sub>f</sub> + H<sub>g</sub> + H<sub>n</sub>), 3.84 - 3.79 (m, 2H, H<sub>f'</sub> + H<sub>g'</sub>), 3.76 - 3.56 (m, 13H, H<sub>h,i,j,k,l,m</sub>), 3.52 (d,  $J$  = 9.2 Hz, 1H, H<sub>b</sub>), 3.38 (m, 1H, H<sub>d</sub>).

$^{13}C$  NMR (150 MHz, CDCl<sub>3</sub>)  $\delta$  98.4 (C<sub>a</sub>), 78.5 (C<sub>d</sub>), 73.0 (C<sub>b</sub>), 72.9 (C<sub>c</sub>), 71.37 + 71.18 (2  $\times$  C, C<sub>h/i/j/k/l/m</sub>), 71.11 (C<sub>e</sub>), 70.54 + 70.35 (double intensity, 4  $\times$  C, C<sub>h/i/j/k/l/m</sub>), 68.61 (C<sub>g</sub>), 67.47 (C<sub>n</sub>), 62.84 (C<sub>f</sub>).

#### DMSO-d<sub>6</sub>:

$^1H$  NMR (600 MHz, DMSO-d<sub>6</sub>)  $\delta$  4.77 (d,  $J$  = 5.4 Hz, 1H, 3-OH), 4.76 (d,  $J$  = 5.4 Hz, 1H, 2-OH), 4.61 (d,  $J$  = 3.4 Hz, 1H, H<sub>a</sub>), 4.34 (dd,  $J$  = 6.6, 4.8 Hz, 1H, 6-OH), 3.94 (ddd,  $J$  = 10.0, 4.0, 2.0 Hz, 1H, H<sub>e</sub>), 3.76 - 3.67 (m, 4H, H<sub>c</sub> + H<sub>f</sub> + H<sub>g</sub> + H<sub>n</sub>), 3.63 - 3.40 (m, 15H, H<sub>f'</sub> + H<sub>g,h,i,j,k,l,m</sub>), 3.22 (m, 1H, H<sub>d</sub>), 3.16 (m, 1H, H<sub>b</sub>).

$^{13}C$  NMR (150 MHz, DMSO-d<sub>6</sub>)  $\delta$  99.1 (C<sub>a</sub>), 76.7 (C<sub>d</sub>), 72.9 (C<sub>b</sub>), 71.6 (C<sub>h/i/j/k/l/m</sub>), 70.8 (2  $\times$  C, C<sub>c</sub> + C<sub>h/i/j/k/l/m</sub>), 70.6, 70.4, 70.3, 70.2 (4  $\times$  C, C<sub>h/i/j/k/l/m</sub>), 70.1 (C<sub>e</sub>), 67.1 (C<sub>g</sub>), 67.1 (C<sub>n</sub>), 61.0 (C<sub>f</sub>).

#### CD<sub>3</sub>CN:

$^1H$  NMR (600 MHz, MeCN-d<sub>3</sub>)  $\delta$  4.73 (d,  $J$  = 3.5 Hz, 1H, H<sub>a</sub>), 4.11 - 4.07 (ddd,  $J$  = 10.0, 4.4, 2.7 Hz, 1H, H<sub>e</sub>), 3.82 - 3.73 (M, 5H, H<sub>c</sub> + H<sub>f</sub> + H<sub>g</sub> + H<sub>n</sub>), 3.72 - 3.53 (m, 12H, H<sub>f'</sub> + H<sub>g'</sub> + H<sub>h,i,j,k,l,m</sub>), 3.50 - 3.44 (m, 2H, H<sub>h,i,j,k,l,m</sub>), 3.28 (d,  $J$  = 6.0 Hz, 1H, H<sub>b</sub>), 3.21 (dd,  $J$  = 10.0, 8.8 Hz, 1H, H<sub>d</sub>), 3.02 (bs, 1H, 2-OH), (m, 1H, 6-OH).

$^{13}C$  NMR (150 MHz, MeCN-d<sub>3</sub>)  $\delta$  98.6 (C<sub>a</sub>), 77.3 (C<sub>d</sub>), 72.8 (C<sub>b</sub>), 71.7 (C<sub>c</sub>), 71.2, 70.6, 70.4 (3  $\times$  C, C<sub>h/i/j/k/l/m</sub>), 70.4 (C<sub>e</sub>), 70.5, 70.3, 70.2 (3  $\times$  C, C<sub>h/i/j/k/l/m</sub>), 67.5 (C<sub>f</sub>), 67.4 (C<sub>g</sub>), 61.9 (C<sub>n</sub>).

#### 4. Titration experiments monitored by $^1\text{H}$ NMR.

The titration experiments were carried out at room temperature. The concentrations of the host and the guest solutions were 6 mM and 300 mM respectively. The data was fitted to a single-site non-competitive binding equation using Prism ver.9.0.0 (GraphPad).

Injection table (valid for all experiments in  $\text{CDCl}_3$ ):

| Titration | Portion of guest solution added ( $\mu\text{L}$ ) | Total volume of guest solution added ( $\mu\text{L}$ ) | Equivalents of guest added | Concentration of guest (mM) |
|-----------|---------------------------------------------------|--------------------------------------------------------|----------------------------|-----------------------------|
| 1         | 0                                                 | 0                                                      | 0                          | 0                           |
| 2         | 1                                                 | 1                                                      | 0.1                        | 0.6                         |
| 3         | 2                                                 | 3                                                      | 0.3                        | 1.8                         |
| 4         | 3                                                 | 6                                                      | 0.6                        | 3.6                         |
| 5         | 4                                                 | 10                                                     | 1.0                        | 6.0                         |
| 6         | 8                                                 | 18                                                     | 1.8                        | 10.8                        |
| 7         | 10                                                | 28                                                     | 2.8                        | 16.8                        |
| 8         | 12                                                | 40                                                     | 4.0                        | 24                          |

Injection table (valid for all experiments in  $\text{CD}_3\text{CN}$  and  $\text{DMSO}-d_6$ ):

| Titration | Portion of guest solution added ( $\mu\text{L}$ ) | Total volume of guest solution added ( $\mu\text{L}$ ) | Equivalents of guest added | Concentration of guest (mM) |
|-----------|---------------------------------------------------|--------------------------------------------------------|----------------------------|-----------------------------|
| 1         | 0                                                 | 0                                                      | 0                          | 0                           |
| 2         | 1                                                 | 1                                                      | 0.1                        | 0.6                         |
| 3         | 3                                                 | 4                                                      | 0.4                        | 2.4                         |
| 4         | 4                                                 | 8                                                      | 0.8                        | 4.8                         |
| 5         | 4                                                 | 12                                                     | 1.2                        | 7.2                         |
| 6         | 12                                                | 24                                                     | 2.4                        | 14.4                        |
| 7         | 12                                                | 36                                                     | 3.6                        | 21.6                        |
| 8         | 16                                                | 52                                                     | 5.2                        | 31.2                        |

#### 4.1 Titrations in CDCl<sub>3</sub>.

##### H-L-Ala-OMe x HCl to receptor 1:

<sup>1</sup>H NMR spectra (top – full, bottom – enhanced view of the receptor signals in the spectra):

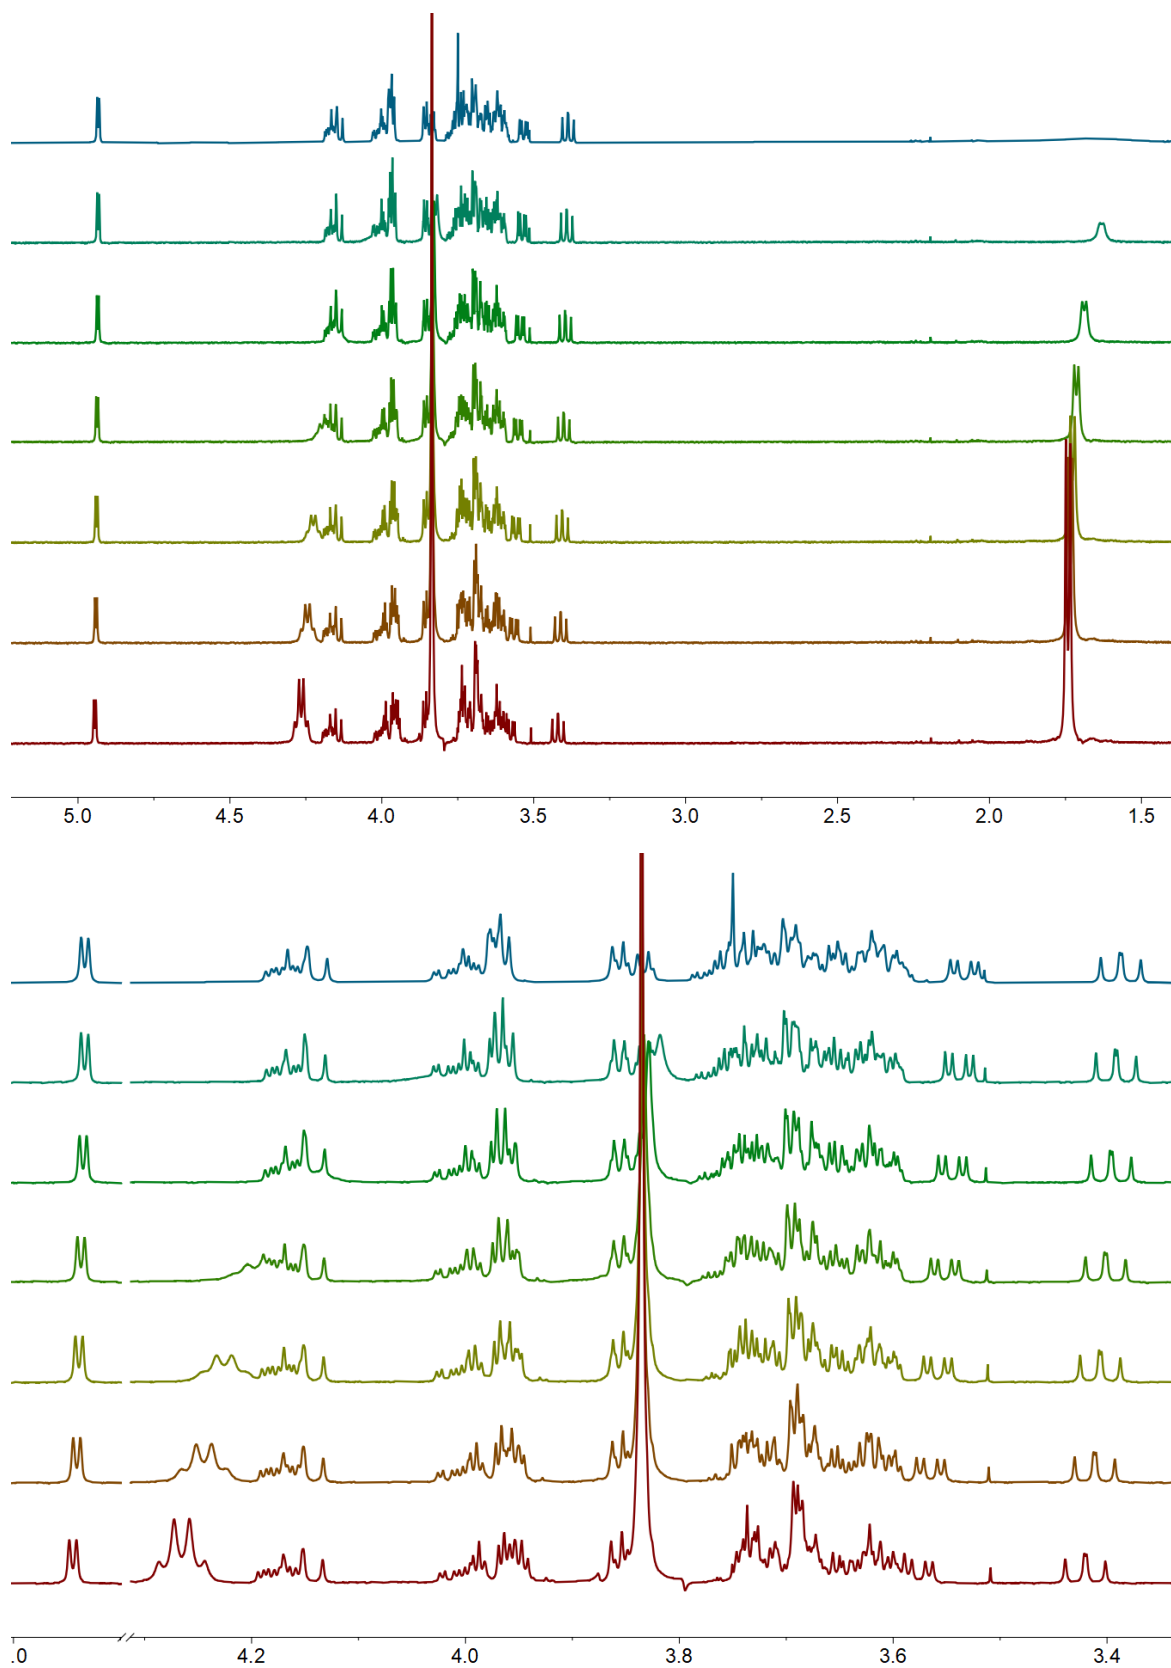

Summary of chemical shift changes:

| Titration | 4.14   | $\Delta$ ppm | 4      | $\Delta$ ppm | 3.87   | $\Delta$ ppm | 3.58   | $\Delta$ ppm |
|-----------|--------|--------------|--------|--------------|--------|--------------|--------|--------------|
| 0         | 4.1456 | 0.0000       | 4.0067 | 0.0000       | 3.871  | 0.0000       | 3.5865 | 0.0000       |
| 1         | 4.1479 | 0.0023       | 4.0023 | 0.0044       | 3.8629 | 0.0081       | 3.5898 | 0.0033       |
| 2         | 4.1495 | 0.0039       | 4.0012 | 0.0055       | 3.8612 | 0.0098       | 3.592  | 0.0055       |
| 3         | 4.1502 | 0.0046       | 3.9999 | 0.0068       | 3.861  | 0.0100       | 3.5933 | 0.0068       |
| 4         | 4.1509 | 0.0053       | 3.9984 | 0.0083       | 3.8605 | 0.0105       | 3.5941 | 0.0076       |
| 5         | 4.1512 | 0.0056       | 3.9977 | 0.0090       | 3.8602 | 0.0108       | 3.595  | 0.0085       |
| 6         | 4.1515 | 0.0059       | 3.9966 | 0.0101       | 3.8598 | 0.0112       | 3.5952 | 0.0087       |
| 7         | 4.1519 | 0.0063       | 3.9947 | 0.0120       | 3.8596 | 0.0114       | 3.5955 | 0.0090       |

Plot of chemical shift change vs guest concentration:

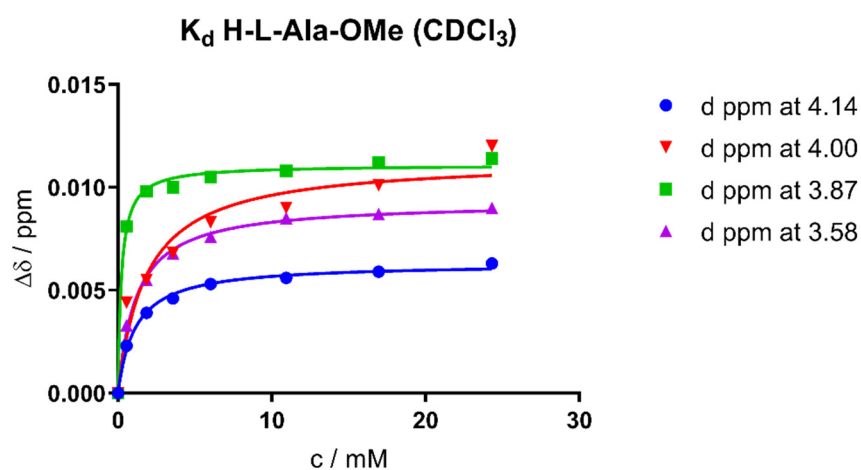

$K_d$  values obtained by fitting the data for selected protons into the single-site specific binding model:

|                         |        |        |        |        |
|-------------------------|--------|--------|--------|--------|
| <b><math>K_d</math></b> | 1.44   | 2.43   | 0.56   | 1.23   |
| <b>R squared</b>        | 0.9917 | 0.9257 | 0.9938 | 0.9933 |

$$K_d = 1.42 \pm 0.67 \text{ mM} \rightarrow K_a = 707 \pm 308 \text{ M}^{-1}$$

**H-D-Ala-OMe x HCl to receptor 1:**

$^1\text{H}$  NMR spectra (top – full, bottom – enhanced view of the receptor signals in the spectra):

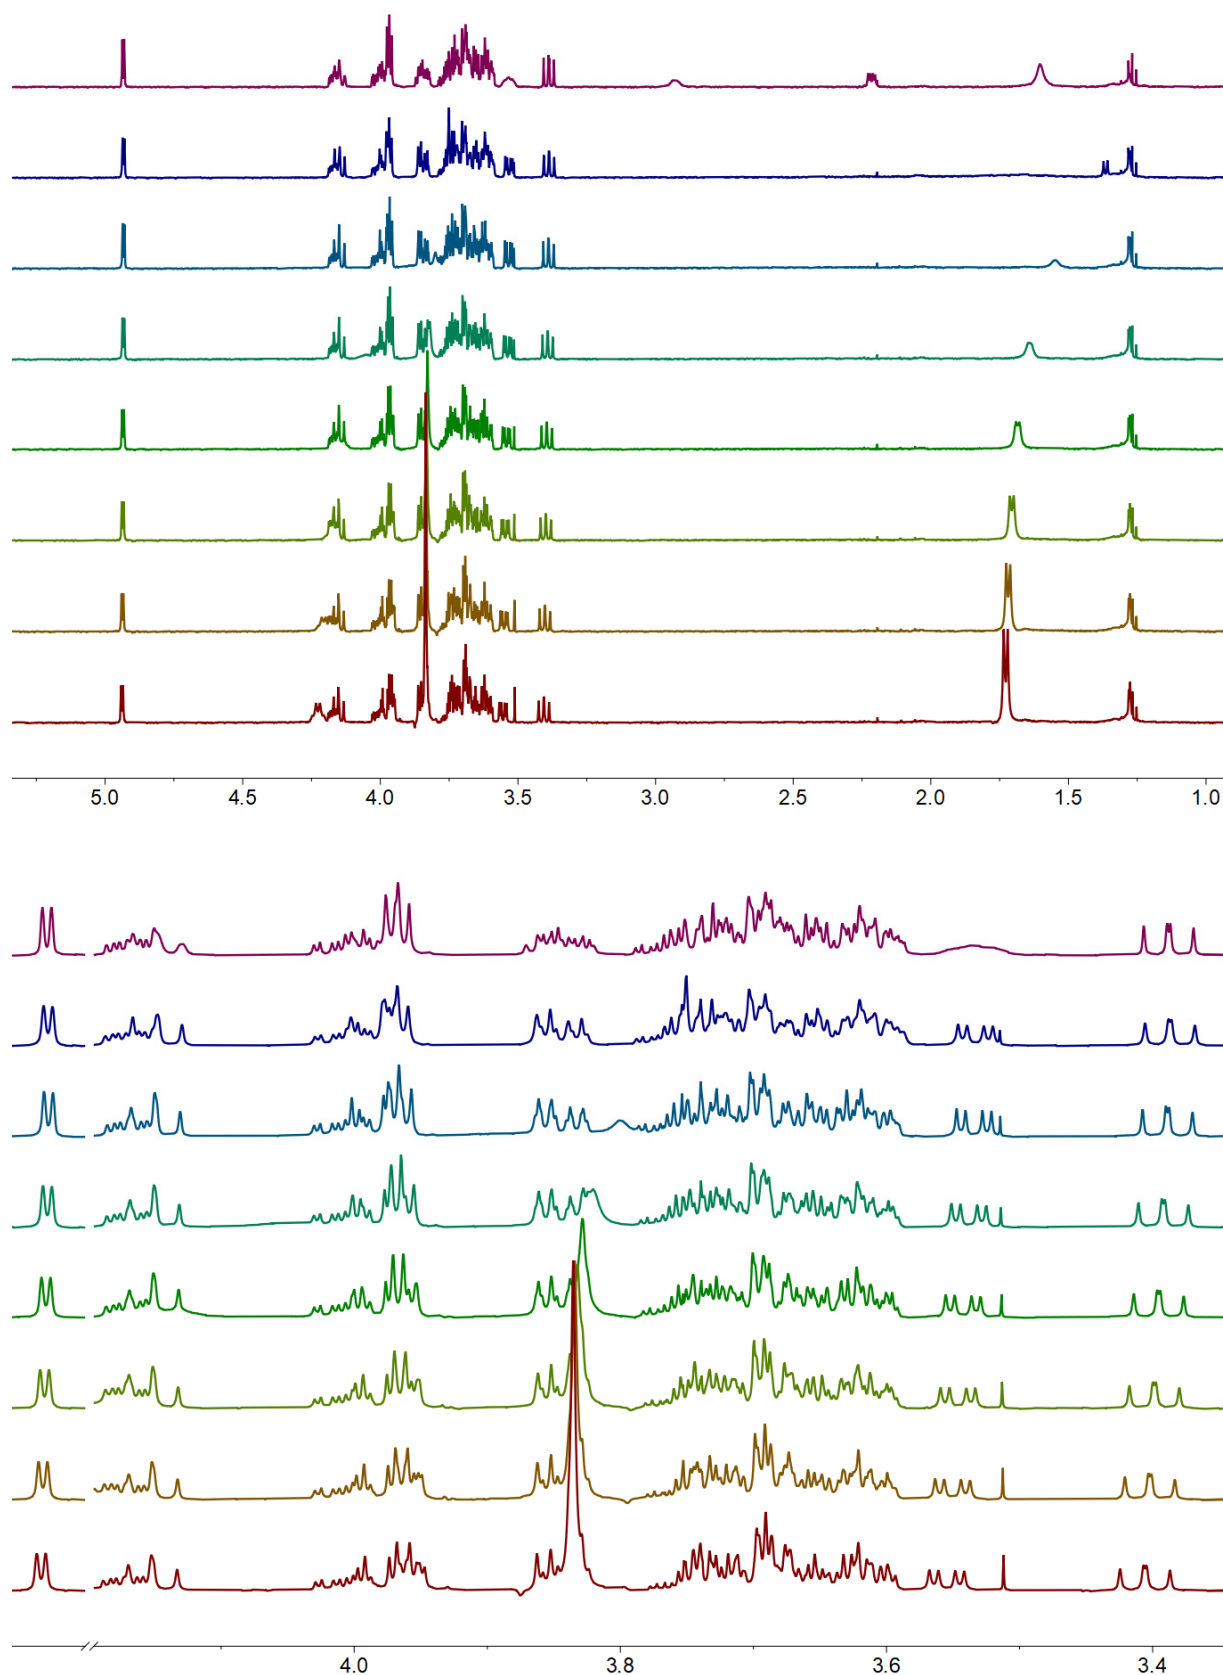

Summary of chemical shift changes:

| Titration | 4.14   | $\Delta$ ppm | 3.99   | $\Delta$ ppm | 3.98   | $\Delta$ ppm | 3.7    | $\Delta$ ppm |
|-----------|--------|--------------|--------|--------------|--------|--------------|--------|--------------|
| 0         | 4.1468 | 0.0000       | 3.9991 | 0.0000       | 3.9822 | 0.0000       | 3.7008 | 0.0000       |
| 1         | 4.148  | 0.0012       | 3.9975 | 0.0016       | 3.9789 | 0.0033       | 3.6963 | 0.0045       |
| 2         | 4.1485 | 0.0017       | 3.9963 | 0.0028       | 3.9779 | 0.0043       | 3.6945 | 0.0063       |
| 3         | 4.1495 | 0.0027       | 3.9952 | 0.0039       | 3.977  | 0.0052       | 3.6936 | 0.0072       |
| 4         | 4.1503 | 0.0035       | 3.9942 | 0.0049       | 3.9763 | 0.0059       | 3.6925 | 0.0083       |
| 5         | 4.1509 | 0.0041       | 3.9932 | 0.0059       | 3.9754 | 0.0068       | 3.6918 | 0.0090       |
| 6         | 4.1516 | 0.0048       | 3.9925 | 0.0066       | 3.9744 | 0.0078       | 3.6913 | 0.0095       |
| 7         | 4.1522 | 0.0054       | 3.9917 | 0.0074       | 3.9733 | 0.0089       | 3.6906 | 0.0102       |

Plot of chemical shift change vs guest concentration:

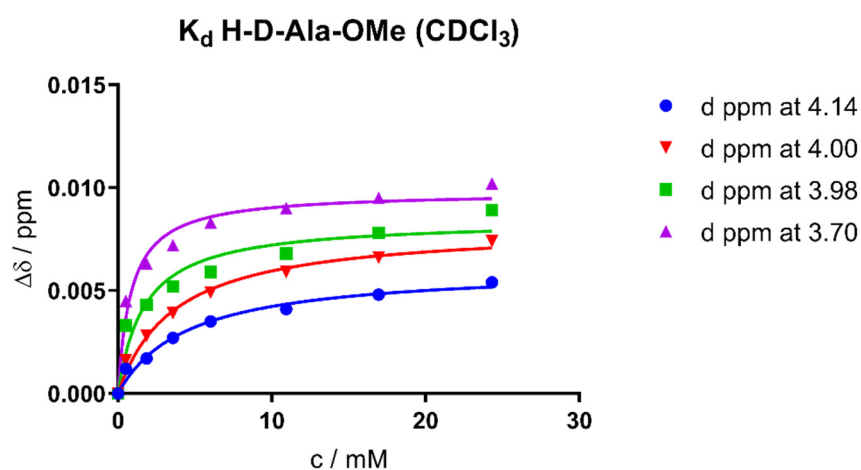

$K_d$  values obtained by fitting the data for selected protons into the single-site specific binding model:

|                         |        |        |        |        |
|-------------------------|--------|--------|--------|--------|
| <b><math>K_d</math></b> | 5.23   | 4.43   | 2.84   | 1.86   |
| <b>R squared</b>        | 0.9788 | 0.9869 | 0.9276 | 0.9719 |

$$K_d = 3.59 \pm 1.32 \text{ mM} \rightarrow K_a = 279 \pm 103 \text{ M}^{-1}$$

**H-L-Phe-OMe x HCl to receptor 1:**

$^1\text{H}$  NMR spectra (top – full, bottom – enhanced view of the receptor signals in the spectra):

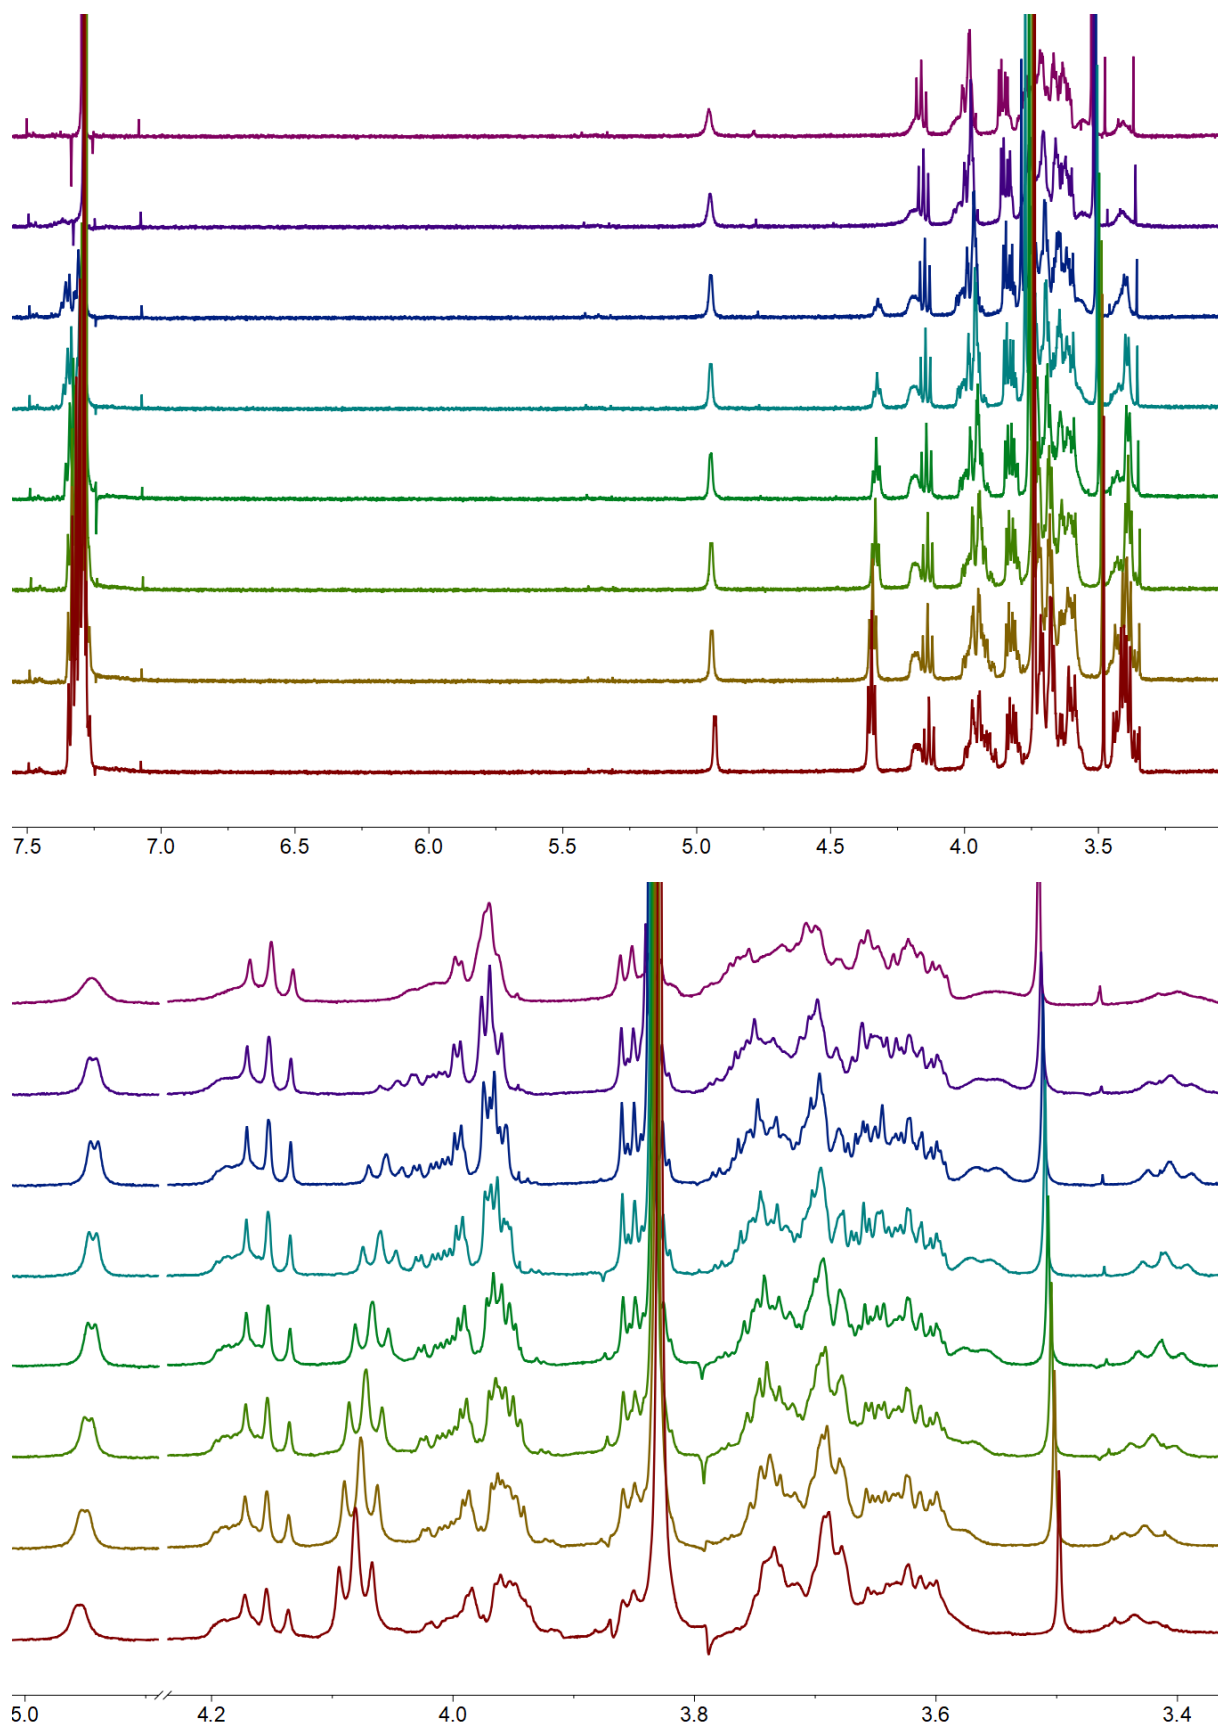



Summary of chemical shift changes:

| Titration | 4.16   | $\Delta$ ppm | 4      | $\Delta$ ppm | 3.96   | $\Delta$ ppm | 3.6    | $\Delta$ ppm |
|-----------|--------|--------------|--------|--------------|--------|--------------|--------|--------------|
| 0         | 4.1614 | 0.0000       | 4.0037 | 0.0000       | 3.9655 | 0.0000       | 3.6079 | 0.0000       |
| 1         | 4.1535 | 0.0079       | 3.9955 | 0.0082       | 3.958  | 0.0075       | 3.6022 | 0.0057       |
| 2         | 4.1481 | 0.0133       | 3.9895 | 0.0142       | 3.9535 | 0.0120       | 3.5992 | 0.0087       |
| 3         | 4.145  | 0.0164       | 3.9825 | 0.0212       | 3.9493 | 0.0162       | 3.5976 | 0.0103       |
| 4         | 4.1425 | 0.0189       | 3.977  | 0.0267       | 3.9451 | 0.0204       | 3.5956 | 0.0123       |
| 5         | 4.1398 | 0.0216       | 3.9719 | 0.0318       | 3.9417 | 0.0238       | 3.5912 | 0.0167       |
| 6         | 4.1372 | 0.0242       | 3.9672 | 0.0365       | 3.9385 | 0.0270       | 3.589  | 0.0189       |
| 7         | 4.133  | 0.0284       | 3.9653 | 0.0384       | 3.9371 | 0.0284       | 3.5876 | 0.0203       |

Plot of chemical shift change vs guest concentration:

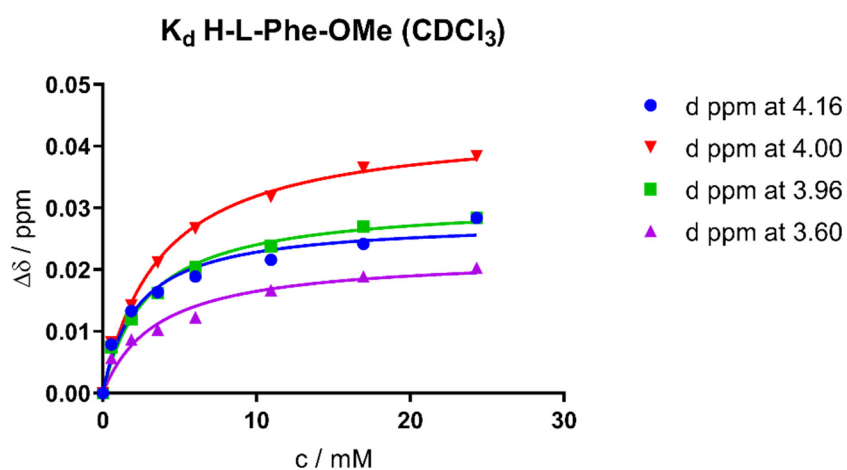

$K_d$  values obtained by fitting the data for selected protons into the single-site specific binding model:

|                         |        |        |        |        |
|-------------------------|--------|--------|--------|--------|
| <b><math>K_d</math></b> | 2.28   | 3.77   | 2.98   | 3.63   |
| <b>R squared</b>        | 0.9632 | 0.9906 | 0.9833 | 0.9592 |

$$K_d = 3.17 \pm 0.59 \text{ mM} \rightarrow K_a = 315 \pm 59 \text{ M}^{-1}$$

**H-D-Phe-OMe x HCl to receptor 1:**

$^1\text{H}$  NMR spectra (top – full, bottom – enhanced view of the receptor signals in the spectra):

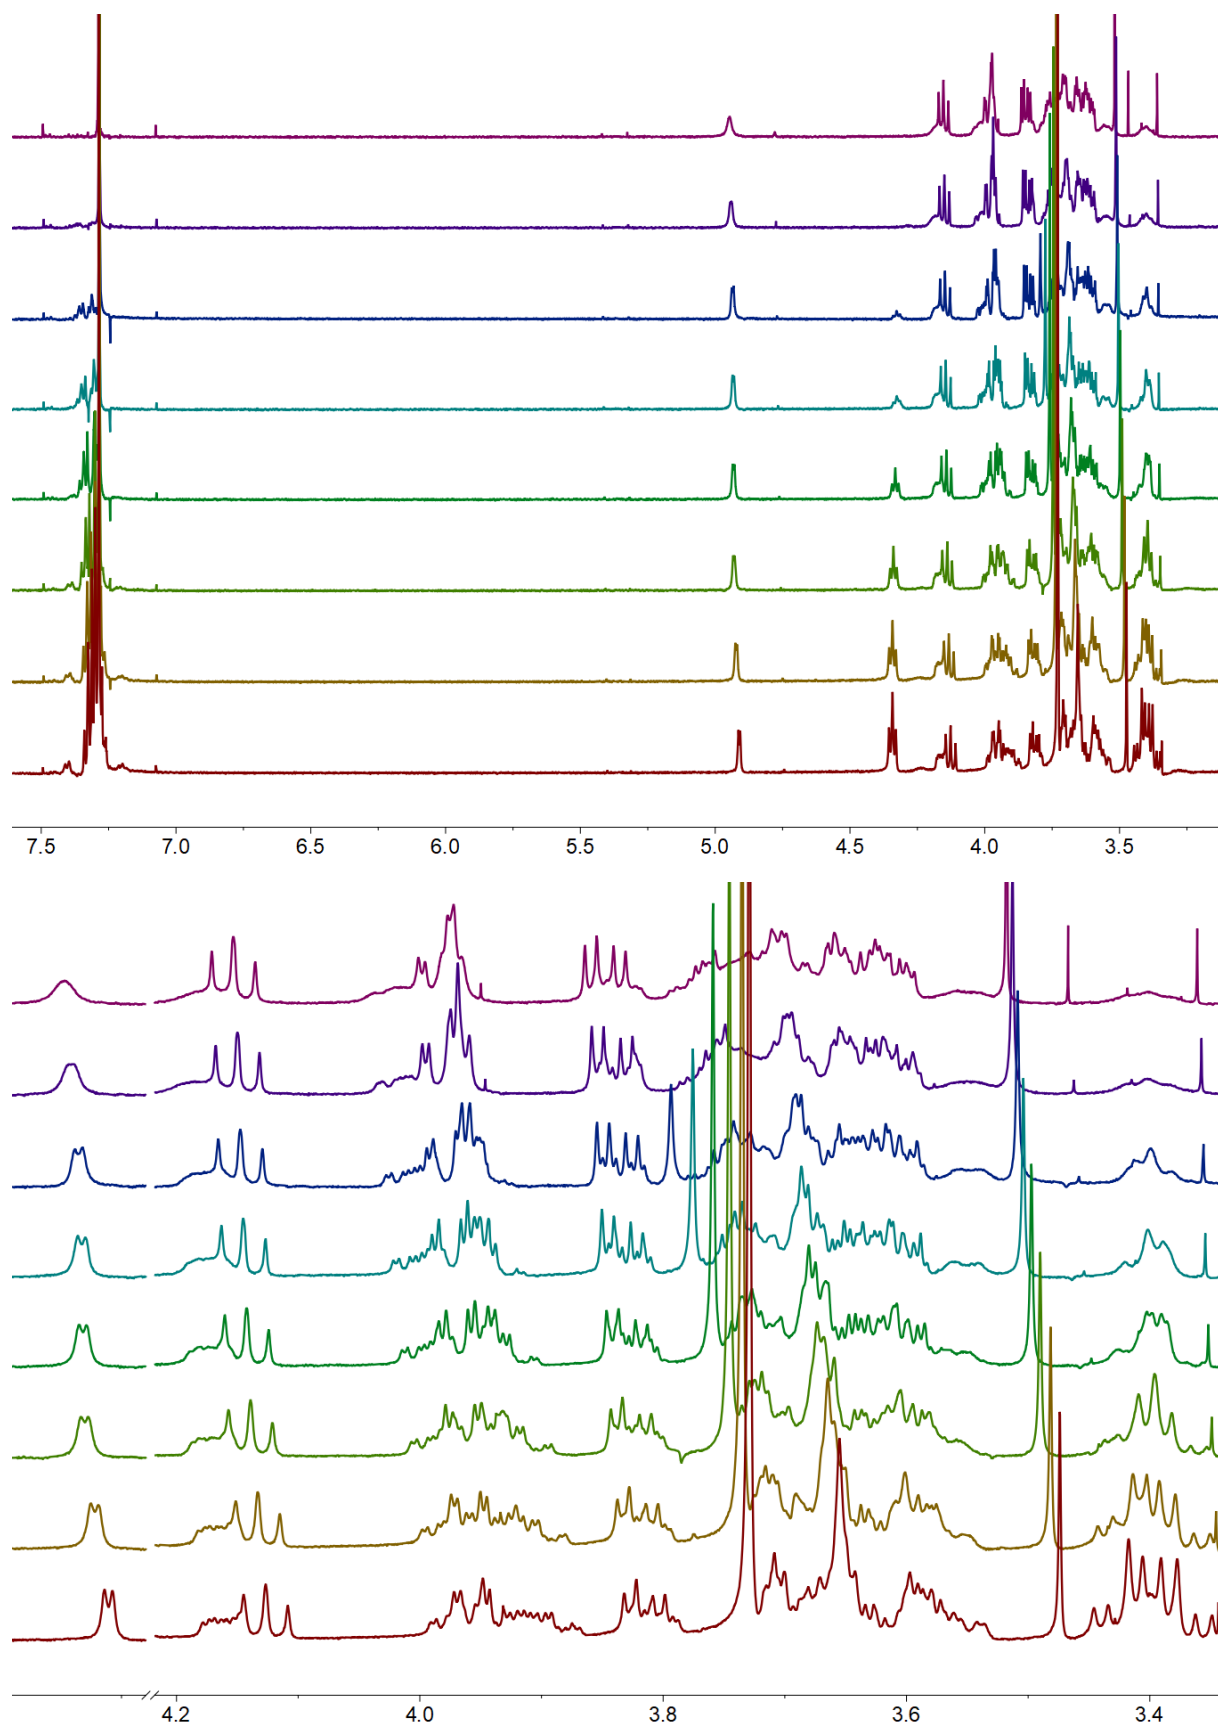

Summary of chemical shift changes:

| Titration | 4.94   | $\Delta$ ppm | 3.98   | $\Delta$ ppm | 3.96   | $\Delta$ ppm | 3.62   | $\Delta$ ppm |
|-----------|--------|--------------|--------|--------------|--------|--------------|--------|--------------|
| 0         | 4.9478 | 0.0000       | 3.9834 | 0.0000       | 3.9655 | 0.0000       | 3.6224 | 0.0000       |
| 1         | 4.941  | 0.0068       | 3.9759 | 0.0075       | 3.958  | 0.0075       | 3.6171 | 0.0053       |
| 2         | 4.9355 | 0.0123       | 3.9702 | 0.0132       | 3.9535 | 0.0120       | 3.6134 | 0.0090       |
| 3         | 4.9328 | 0.0150       | 3.9663 | 0.0171       | 3.9493 | 0.0162       | 3.6110 | 0.0114       |
| 4         | 4.9316 | 0.0162       | 3.9599 | 0.0235       | 3.9451 | 0.0204       | 3.6082 | 0.0142       |
| 5         | 4.9301 | 0.0177       | 3.9547 | 0.0287       | 3.9417 | 0.0238       | 3.6059 | 0.0165       |
| 6         | 4.9223 | 0.0255       | 3.9508 | 0.0326       | 3.9385 | 0.0270       | 3.6017 | 0.0207       |
| 7         | 4.9138 | 0.0340       | 3.9491 | 0.0343       | 3.9371 | 0.0284       | 3.5985 | 0.0239       |

Plot of chemical shift change vs guest concentration:

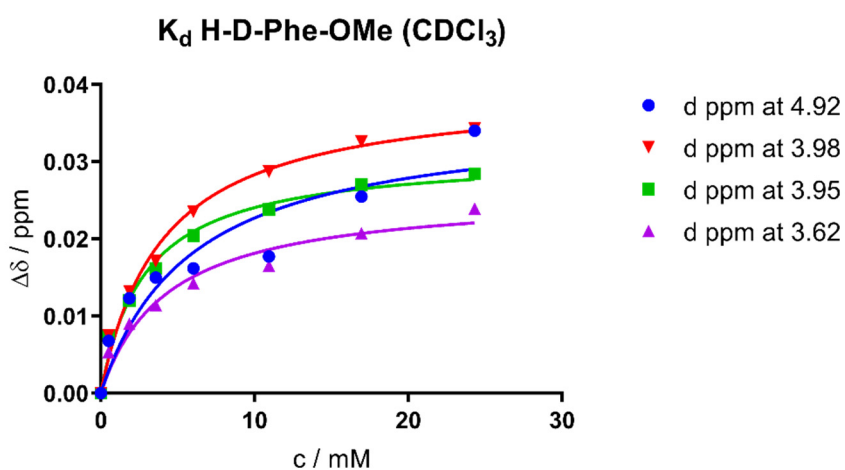

$K_d$  values obtained by fitting the data for selected protons into the single-site specific binding model:

|                         |        |        |        |        |
|-------------------------|--------|--------|--------|--------|
| <b><math>K_d</math></b> | 5.83   | 4.58   | 3.55   | 4.92   |
| <b>R squared</b>        | 0.8759 | 0.9883 | 0.9833 | 0.9607 |

$$K_d = 4.72 \pm 0.82 \text{ mM} \rightarrow K_a = 212 \pm 37 \text{ M}^{-1}$$

**H-L-Pro-OMe x HCl to receptor 1:**

$^1\text{H}$  NMR spectra (top – full, bottom – enhanced view of the receptor signals in the spectra):

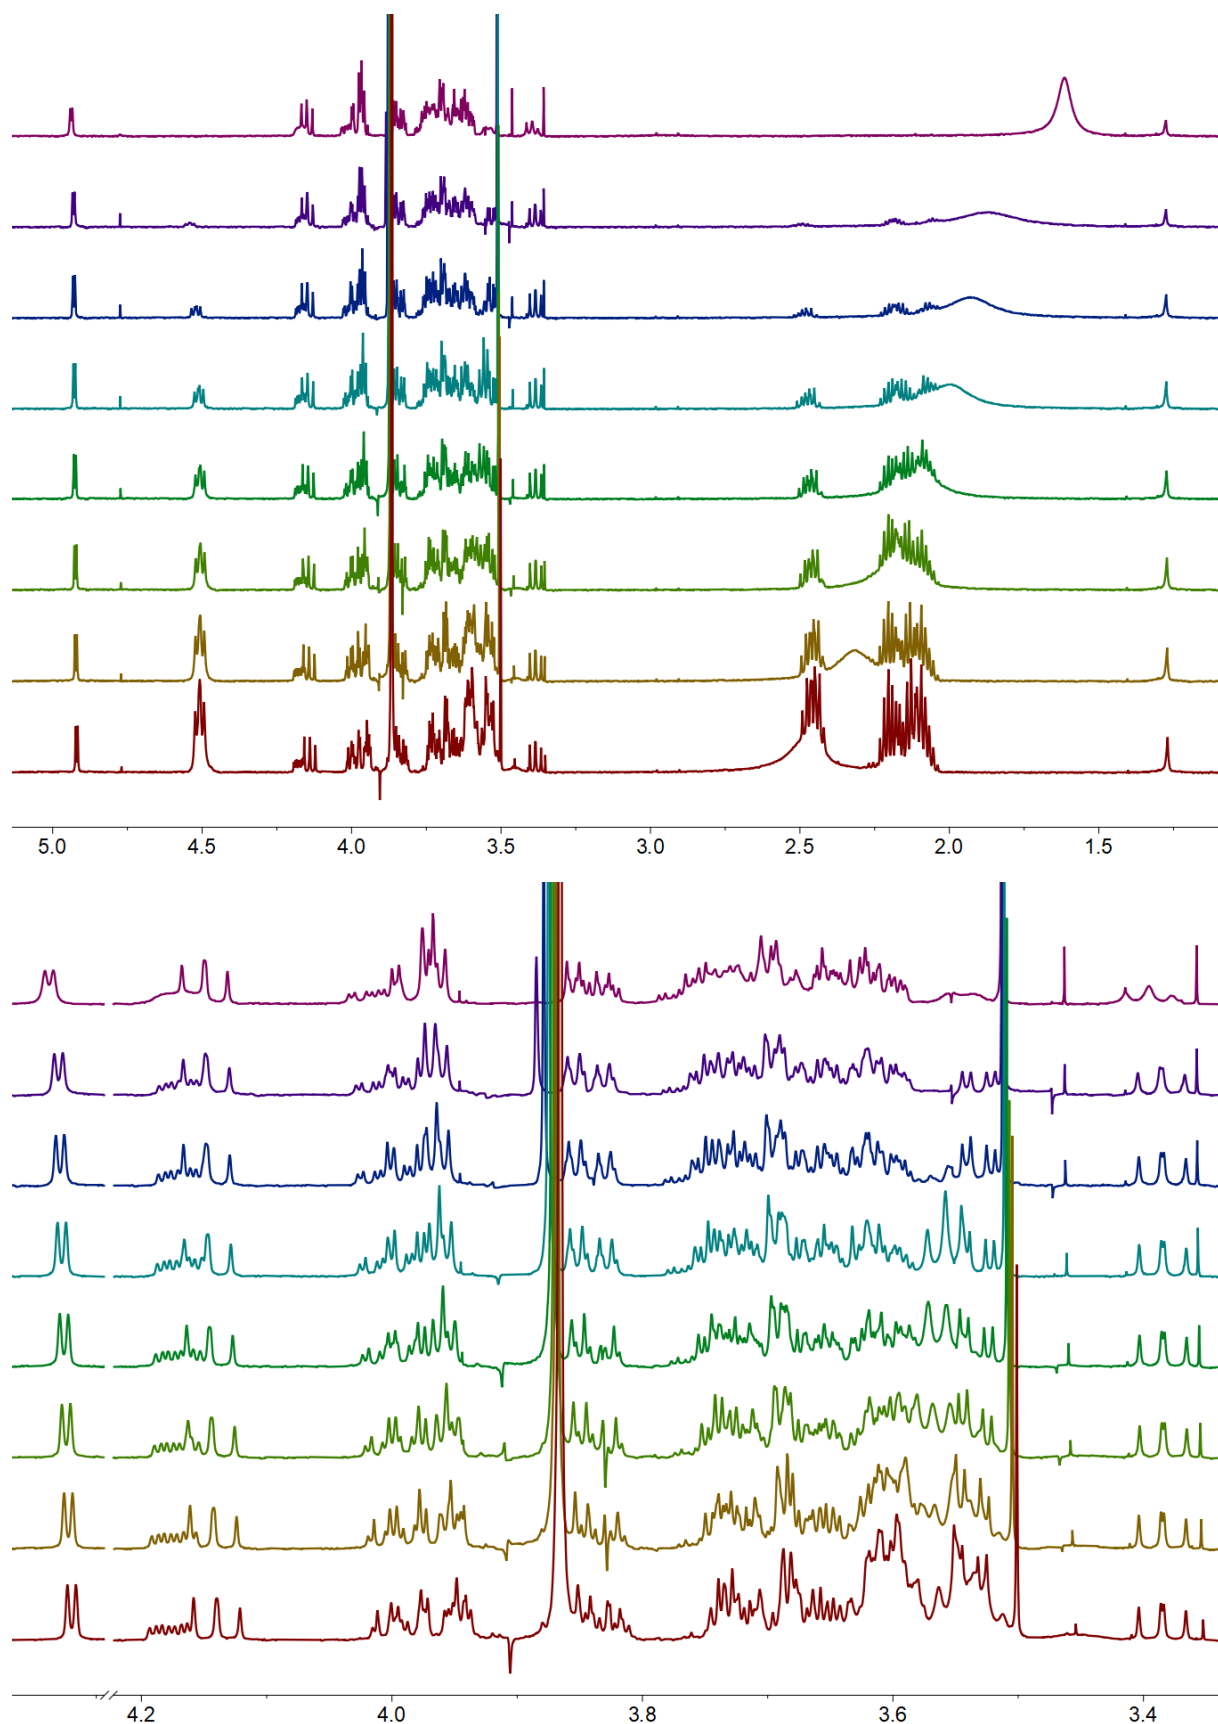

Summary of chemical shift changes:

| Titration | 4.93   | $\Delta$ ppm | 4      | $\Delta$ ppm | 3.84   | $\Delta$ ppm | 3.71   | $\Delta$ ppm |
|-----------|--------|--------------|--------|--------------|--------|--------------|--------|--------------|
| 0         | 4.9375 | 0.0000       | 3.9968 | 0.0000       | 3.8453 | 0.0000       | 3.7054 | 0.0000       |
| 1         | 4.9301 | 0.0074       | 4.0002 | 0.0034       | 3.8422 | 0.0031       | 3.7019 | 0.0035       |
| 2         | 4.9288 | 0.0087       | 4.0008 | 0.0040       | 3.8409 | 0.0044       | 3.7007 | 0.0047       |
| 3         | 4.9273 | 0.0102       | 4.001  | 0.0042       | 3.84   | 0.0053       | 3.6993 | 0.0061       |
| 4         | 4.9255 | 0.0120       | 4.0015 | 0.0047       | 3.8375 | 0.0078       | 3.697  | 0.0084       |
| 5         | 4.9238 | 0.0137       | 4.0019 | 0.0051       | 3.9362 | 0.0909       | 3.6949 | 0.0105       |
| 6         | 4.9215 | 0.0160       | 4.003  | 0.0062       | 3.8344 | 0.0109       | 3.6911 | 0.0143       |
| 7         | 4.9187 | 0.0188       | 4.0033 | 0.0065       | 3.8312 | 0.0141       | 3.6895 | 0.0159       |

Plot of chemical shift change vs guest concentration:

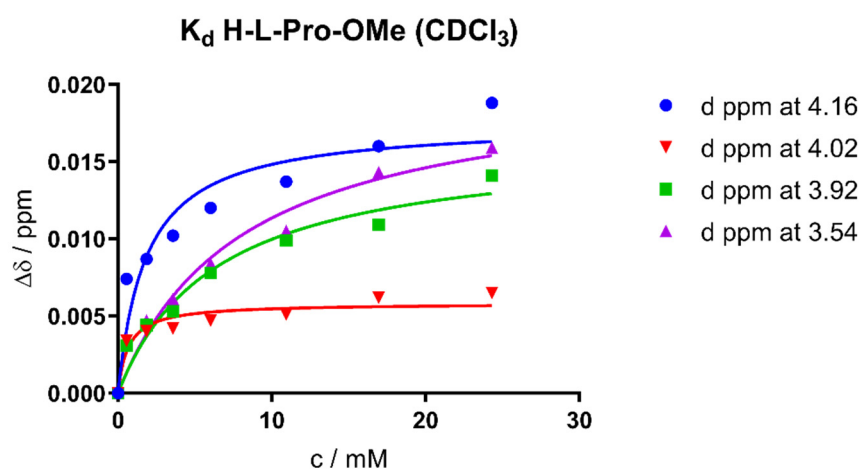

$K_d$  values obtained by fitting the data for selected protons into the single-site specific binding model:

|                         |       |        |        |        |
|-------------------------|-------|--------|--------|--------|
| <b><math>K_d</math></b> | 3.37  | 2.59   | 4.06   | 5.65   |
| <b>R squared</b>        | 0.888 | 0.8916 | 0.9622 | 0.9546 |

$$K_d = 3.92 \pm 1.13 \text{ mM} \rightarrow K_a = 255 \pm 74 \text{ M}^{-1}$$

**H-D-Pro-OMe x HCl to receptor 1:**

$^1\text{H}$  NMR spectra (top – full, bottom – enhanced view of the receptor signals in the spectra):

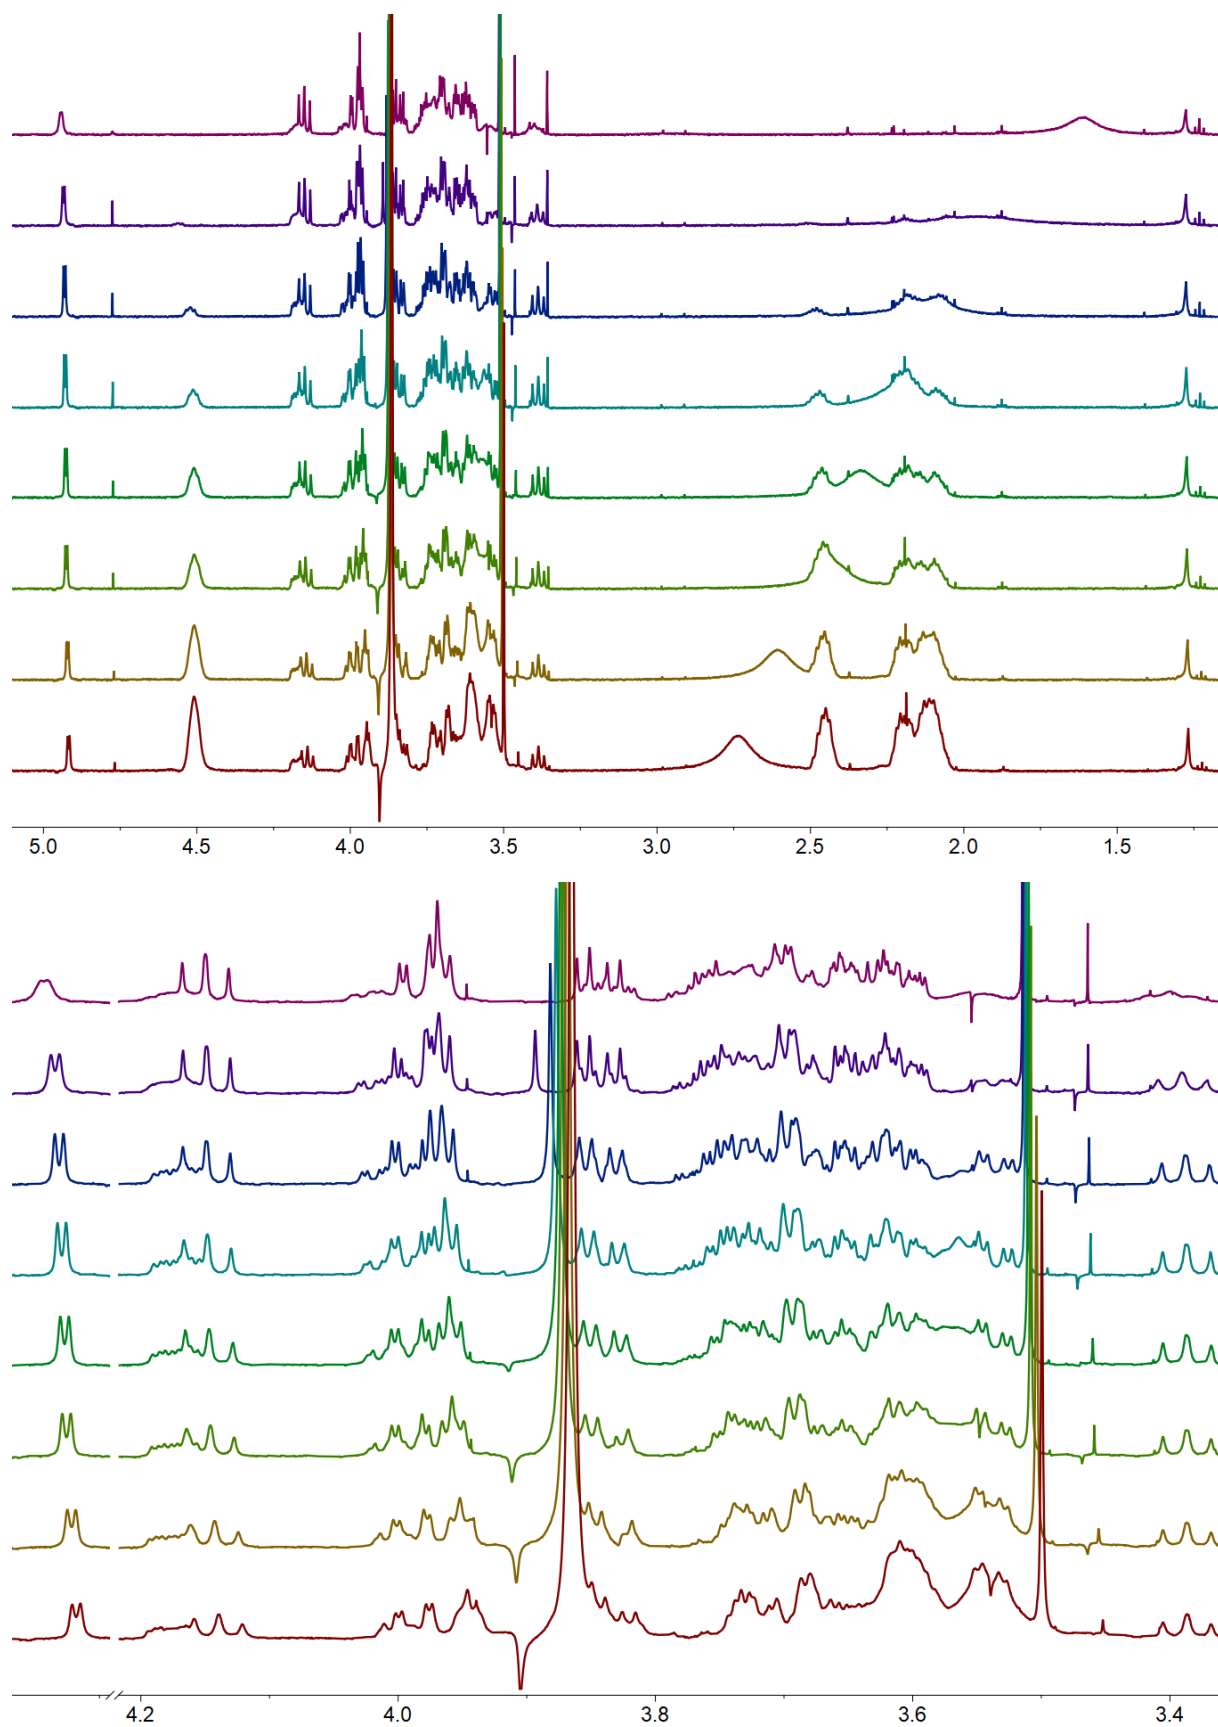

Summary of chemical shift changes:

| Titration | 4.94   | $\Delta$ ppm | 4.02   | $\Delta$ ppm | 3.84   | $\Delta$ ppm | 3.39   | $\Delta$ ppm |
|-----------|--------|--------------|--------|--------------|--------|--------------|--------|--------------|
| 0         | 4.9436 | 0.0000       | 4.0276 | 0.0000       | 3.8448 | 0.0000       | 3.3957 | 0.0000       |
| 1         | 4.9346 | 0.0090       | 4.0215 | 0.0061       | 3.8424 | 0.0024       | 3.3856 | 0.0101       |
| 2         | 4.9314 | 0.0122       | 4.0191 | 0.0085       | 3.8414 | 0.0034       | 3.3849 | 0.0108       |
| 3         | 4.9291 | 0.0145       | 4.0169 | 0.0107       | 3.84   | 0.0048       | 3.3845 | 0.0112       |
| 4         | 4.9271 | 0.0165       | 4.0153 | 0.0123       | 3.8392 | 0.0056       | 3.3844 | 0.0113       |
| 5         | 4.9256 | 0.0180       | 4.0135 | 0.0141       | 3.8369 | 0.0079       | 3.3842 | 0.0115       |
| 6         | 4.9219 | 0.0217       | 4.0106 | 0.0170       | 3.8339 | 0.0109       | 3.3841 | 0.0116       |
| 7         | 4.9177 | 0.0259       | 4.0075 | 0.0201       | 3.8323 | 0.0125       | 3.3840 | 0.0117       |

Plot of chemical shift change vs guest concentration:

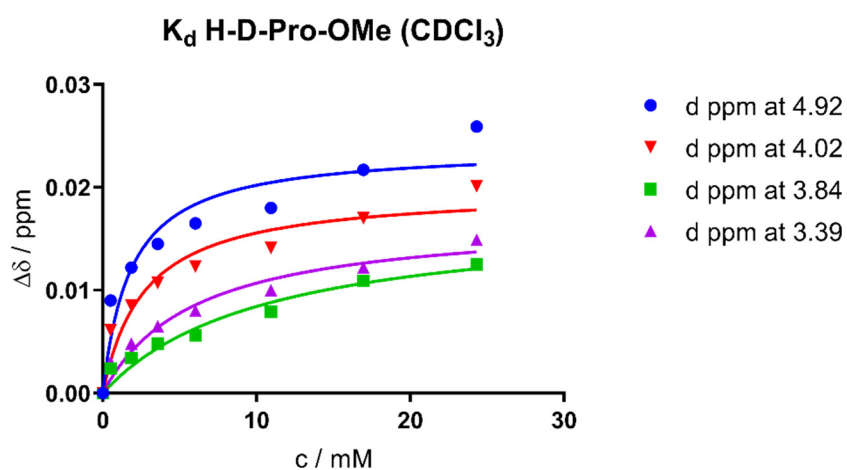

$K_d$  values obtained by fitting the data for selected protons into the single-site specific binding model:

|                         |       |        |        |        |
|-------------------------|-------|--------|--------|--------|
| <b><math>K_d</math></b> | 3.41  | 5.8    | 8.69   | 6.82   |
| <b>R squared</b>        | 0.929 | 0.9592 | 0.9612 | 0.9984 |

$$K_d = 6.18 \pm 1.91 \text{ mM} \rightarrow K_a = 162 \pm 50 \text{ M}^{-1}$$

**H-L-Thr-OMe x HCl to receptor 1:**

$^1\text{H}$  NMR spectra (top – full, bottom – enhanced view of the receptor signals in the spectra):

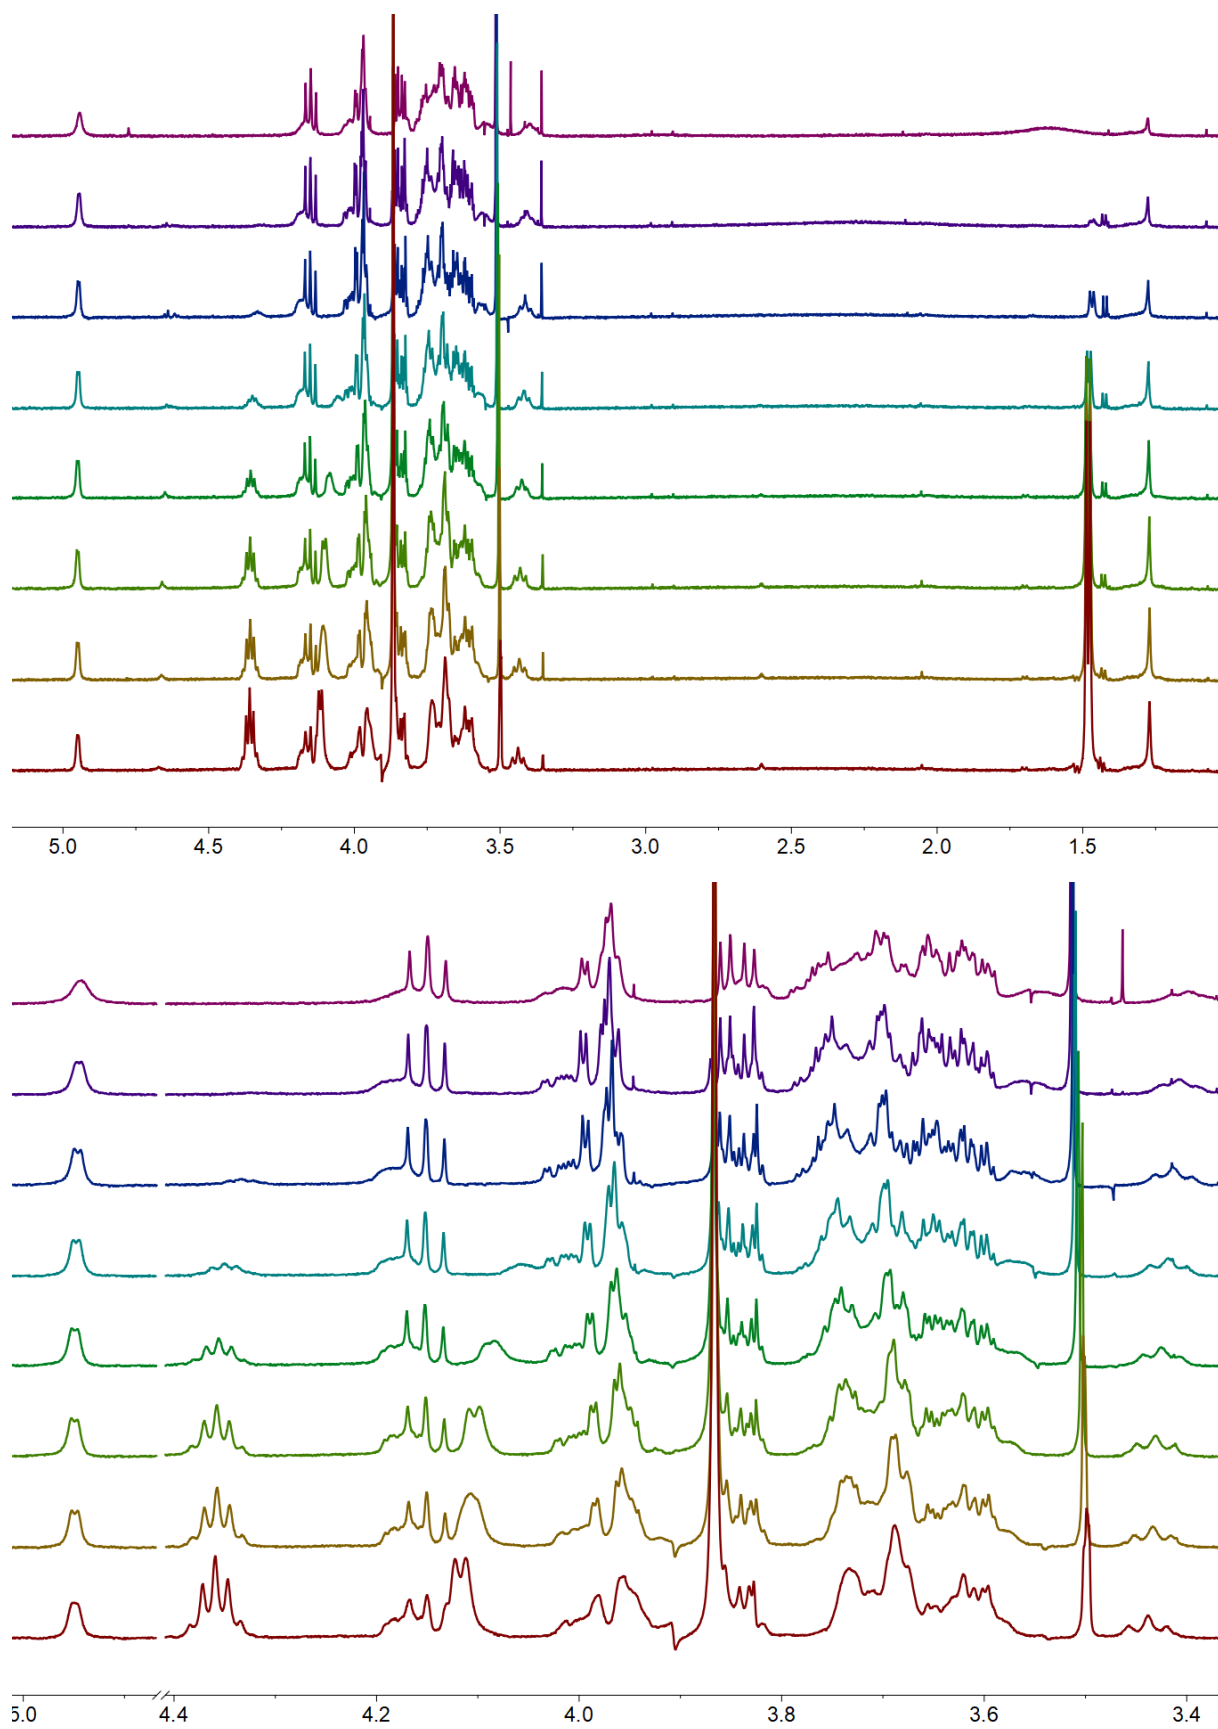



Summary of chemical shift changes:

| Titration | 4.94   | $\Delta$ ppm | 4.13   | $\Delta$ ppm | 3.82   | $\Delta$ ppm | 3.76   | $\Delta$ ppm |
|-----------|--------|--------------|--------|--------------|--------|--------------|--------|--------------|
| 0         | 4.9424 | 0.0000       | 4.1393 | 0.0000       | 3.8266 | 0.0000       | 3.7609 | 0.0000       |
| 1         | 4.9453 | 0.0029       | 4.1411 | 0.0018       | 3.8303 | 0.0037       | 3.7559 | 0.0050       |
| 2         | 4.9466 | 0.0042       | 4.1418 | 0.0025       | 3.8331 | 0.0065       | 3.7516 | 0.0093       |
| 3         | 4.948  | 0.0056       | 4.1423 | 0.0030       | 3.8351 | 0.0085       | 3.7485 | 0.0124       |
| 4         | 4.9488 | 0.0064       | 4.1426 | 0.0033       | 3.8362 | 0.0096       | 3.7447 | 0.0162       |
| 5         | 4.9492 | 0.0068       | 4.1428 | 0.0035       | 3.8369 | 0.0103       | 3.7404 | 0.0205       |
| 6         | 4.9495 | 0.0071       | 4.1429 | 0.0036       | 3.837  | 0.0104       | 3.7392 | 0.0217       |
| 7         | 4.9496 | 0.0072       | 4.1429 | 0.0036       | 3.8371 | 0.0105       | 3.7388 | 0.0221       |

Plot of chemical shift change vs guest concentration:

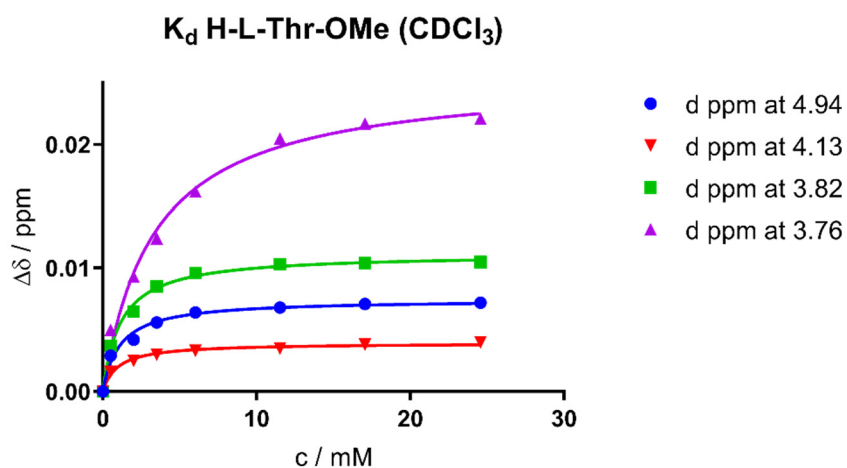

$K_d$  values obtained by fitting the data for selected protons into the single-site specific binding model:

|                         |        |       |        |       |
|-------------------------|--------|-------|--------|-------|
| <b><math>K_d</math></b> | 1.21   | 1.06  | 1.36   | 2.24  |
| <b>R squared</b>        | 0.9836 | 0.986 | 0.9944 | 0.983 |

$$K_d = 1.47 \pm 0.46 \text{ mM} \rightarrow K_a = 680 \pm 213 \text{ M}^{-1}$$

**H-D-Thr-OMe x HCl to receptor 1:**

$^1\text{H}$  NMR spectra (top – full, bottom – enhanced view of the receptor signals in the spectra):

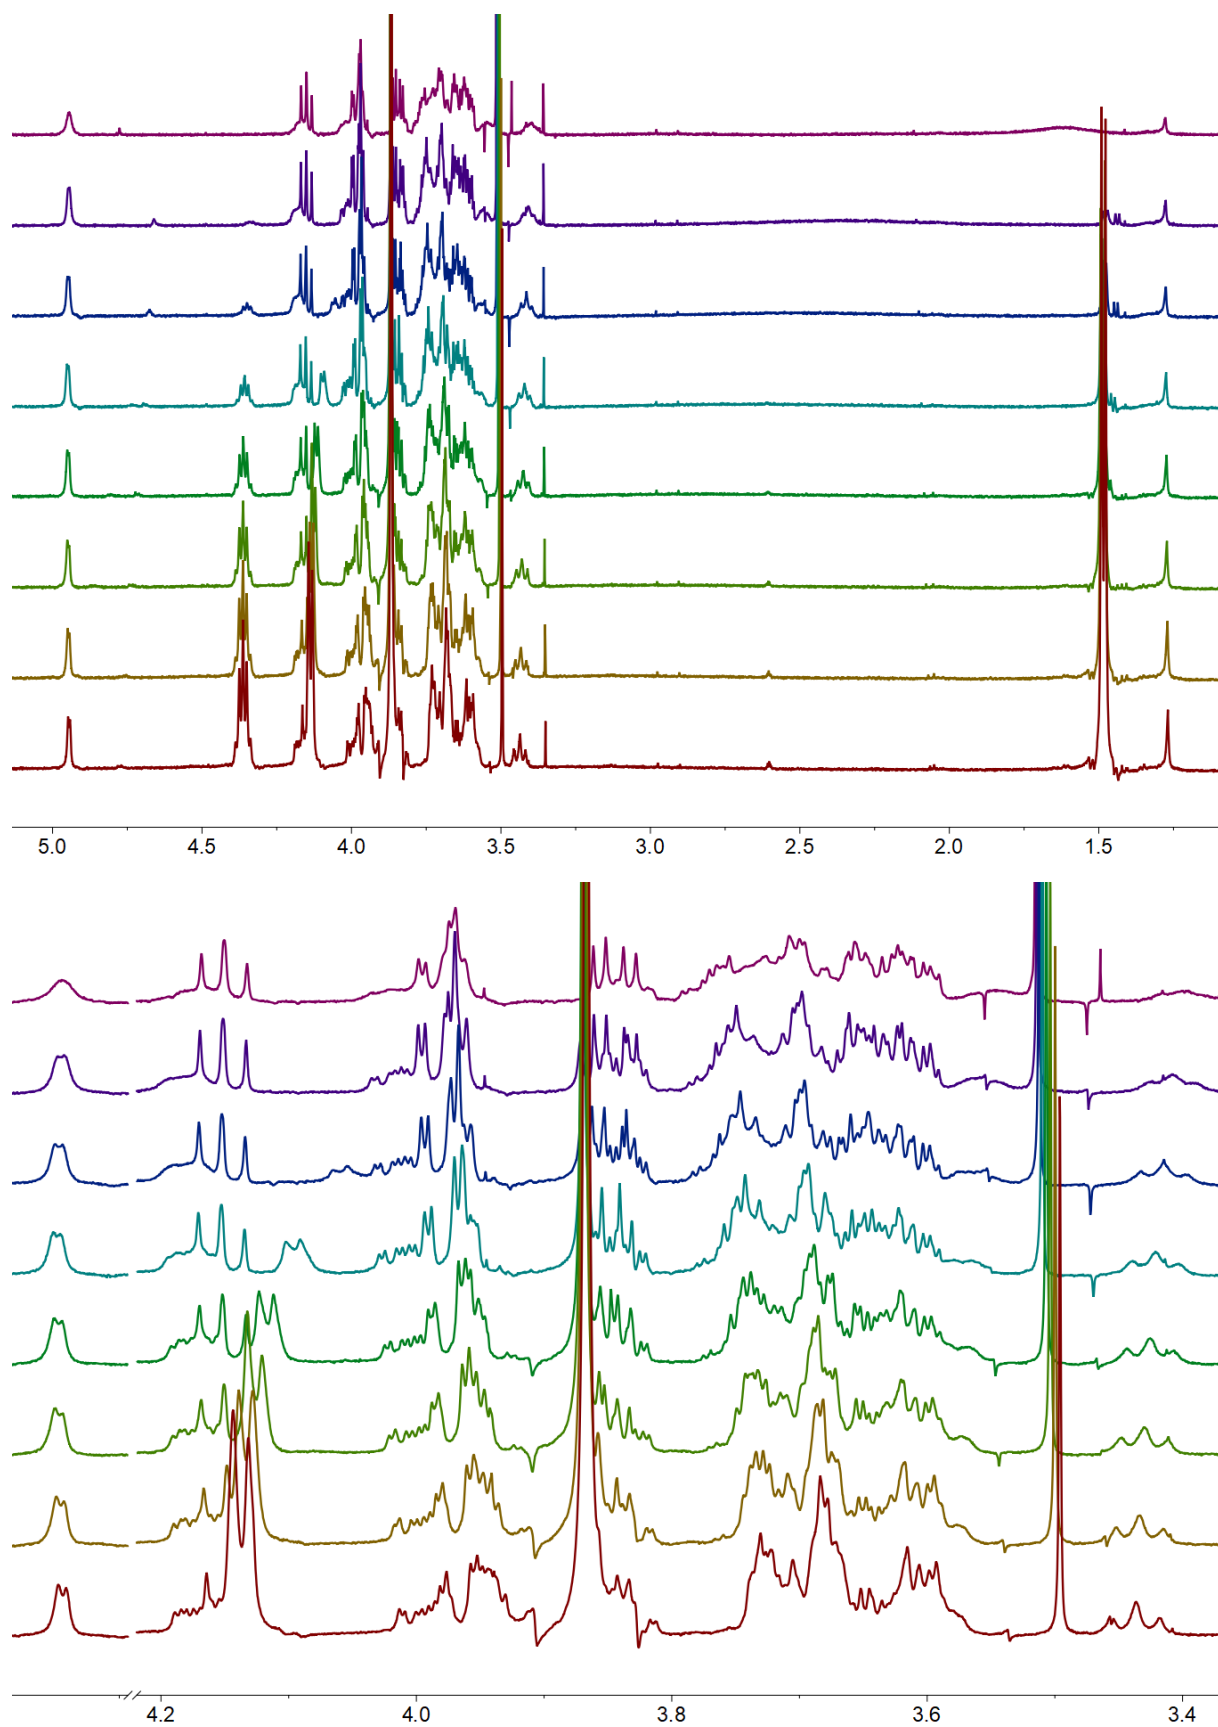

Summary of chemical shift changes:

| Titration | 4.19   | $\Delta$ ppm | 3.83   | $\Delta$ ppm | 3.7    | $\Delta$ ppm | 3.39   | $\Delta$ ppm |
|-----------|--------|--------------|--------|--------------|--------|--------------|--------|--------------|
| 0         | 4.1923 | 0.0000       | 3.8367 | 0.0000       | 3.7074 | 0.0000       | 3.3979 | 0.0000       |
| 1         | 4.1899 | 0.0024       | 3.8373 | 0.0006       | 3.7016 | 0.0058       | 3.4081 | 0.0102       |
| 2         | 4.1863 | 0.0060       | 3.8389 | 0.0022       | 3.6994 | 0.0080       | 3.4149 | 0.0170       |
| 3         | 4.1857 | 0.0066       | 3.8407 | 0.0040       | 3.6968 | 0.0106       | 3.4208 | 0.0229       |
| 4         | 4.1842 | 0.0081       | 3.8418 | 0.0051       | 3.6928 | 0.0146       | 3.4254 | 0.0275       |
| 5         | 4.1837 | 0.0086       | 3.8424 | 0.0057       | 3.6895 | 0.0179       | 3.4302 | 0.0323       |
| 6         | 4.1826 | 0.0097       | 3.8427 | 0.0060       | 3.6864 | 0.0210       | 3.4337 | 0.0358       |
| 7         | 4.182  | 0.0103       | 3.8428 | 0.0061       | 3.6843 | 0.0231       | 3.4358 | 0.0379       |

Plot of chemical shift change vs guest concentration:

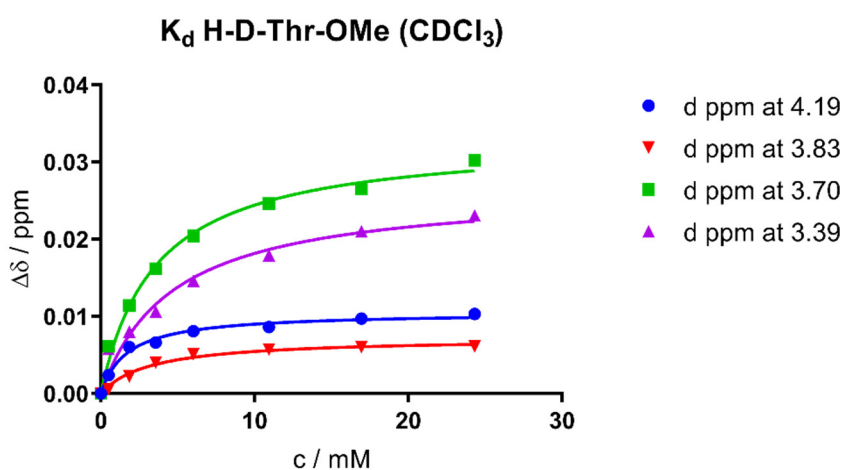

$K_d$  values obtained by fitting the data for selected protons into the single-site specific binding model:

|                         |        |        |        |        |
|-------------------------|--------|--------|--------|--------|
| <b><math>K_d</math></b> | 2      | 3.35   | 3.66   | 4.57   |
| <b>R squared</b>        | 0.9906 | 0.9823 | 0.9904 | 0.9711 |

$$K_d = 3.40 \pm 0.92 \text{ mM} \rightarrow K_a = 295 \pm 80 \text{ M}^{-1}$$

**H-L-Val-OMe x HCl to receptor 1:**

$^1\text{H}$  NMR spectra (top – full, bottom – enhanced view of the receptor signals in the spectra):

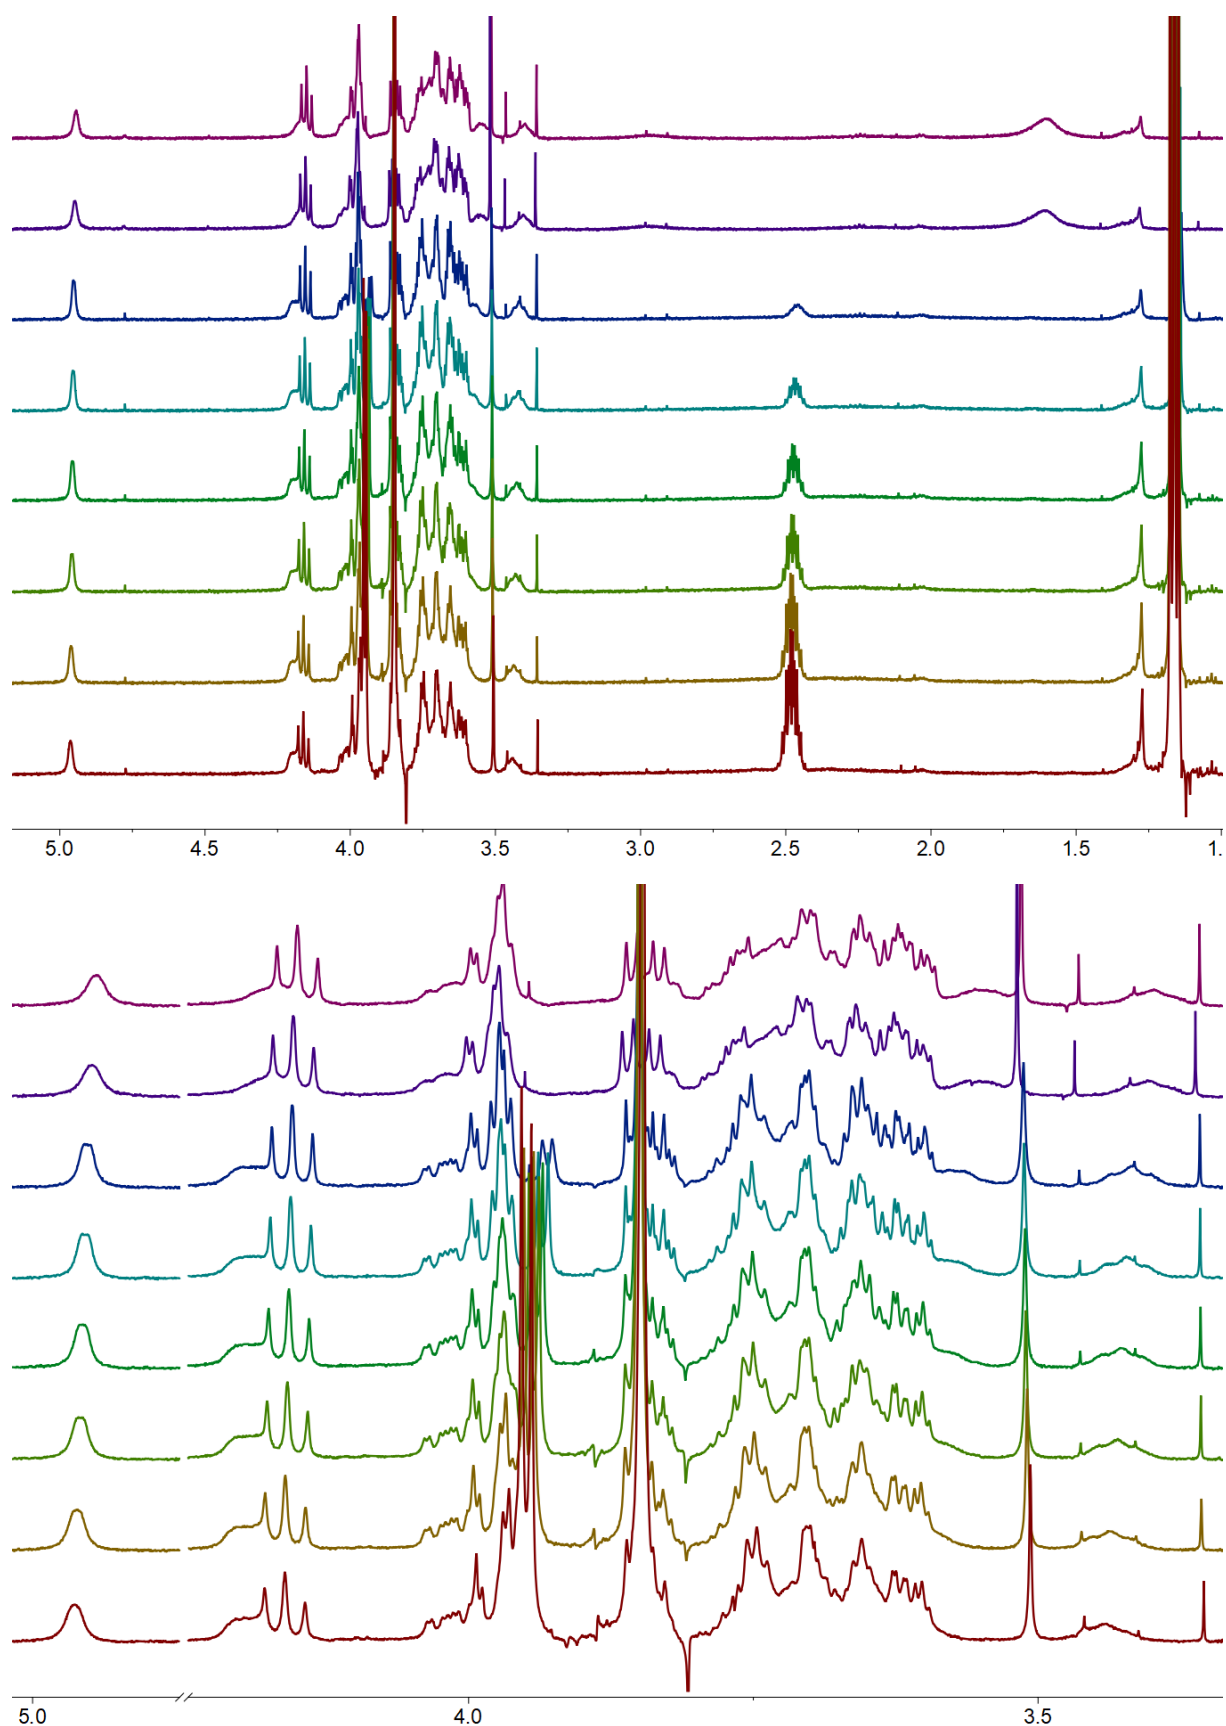

Summary of chemical shift changes:

| Titration | 4.15   | $\Delta$ ppm | 4.01   | $\Delta$ ppm | 3.86   | $\Delta$ ppm | 3.59   | $\Delta$ ppm |
|-----------|--------|--------------|--------|--------------|--------|--------------|--------|--------------|
| 0         | 4.1502 | 0.0000       | 4.0064 | 0.0000       | 3.8695 | 0.0000       | 3.59   | 0.0000       |
| 1         | 4.154  | 0.0038       | 4.0022 | 0.0042       | 3.8652 | 0.0043       | 3.5927 | 0.0027       |
| 2         | 4.1552 | 0.0050       | 3.998  | 0.0084       | 3.862  | 0.0075       | 3.5933 | 0.0033       |
| 3         | 4.1563 | 0.0061       | 3.9975 | 0.0089       | 3.8617 | 0.0078       | 3.5938 | 0.0038       |
| 4         | 4.1575 | 0.0073       | 3.9969 | 0.0095       | 3.8615 | 0.0080       | 3.5943 | 0.0043       |
| 5         | 4.1584 | 0.0082       | 3.9963 | 0.0101       | 3.8613 | 0.0082       | 3.5951 | 0.0051       |
| 6         | 4.1594 | 0.0092       | 3.9957 | 0.0107       | 3.8612 | 0.0083       | 3.5955 | 0.0055       |
| 7         | 4.1601 | 0.0099       | 3.9937 | 0.0127       | 3.8609 | 0.0086       | 3.5959 | 0.0059       |

Plot of chemical shift change vs guest concentration:

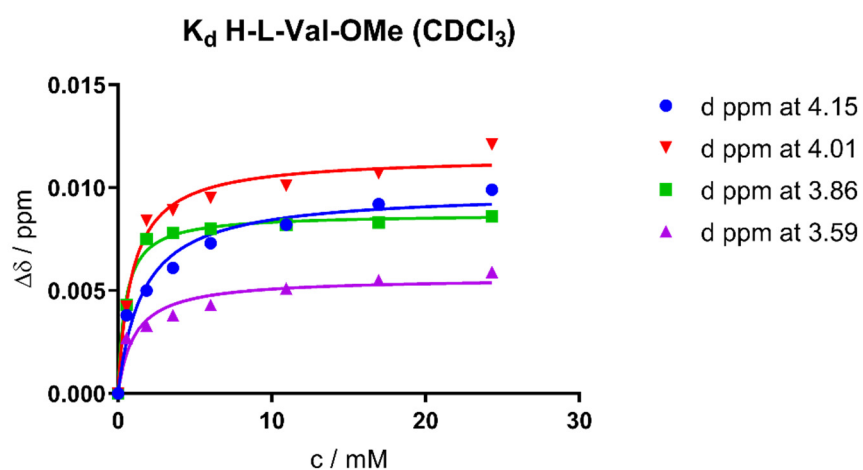

$K_d$  values obtained by fitting the data for selected protons into the single-site specific binding model:

|                         |        |        |        |        |
|-------------------------|--------|--------|--------|--------|
| <b><math>K_d</math></b> | 1.44   | 0.95   | 0.66   | 1.05   |
| <b>R squared</b>        | 0.9503 | 0.9705 | 0.9951 | 0.9303 |

$$K_d = 1.03 \pm 0.28 \text{ mM} \rightarrow K_a = 977 \pm 266 \text{ M}^{-1}$$

**H-D-Val-OMe x HCl to receptor 1:**

$^1\text{H}$  NMR spectra (top – full, bottom – enhanced view of the receptor signals in the spectra):

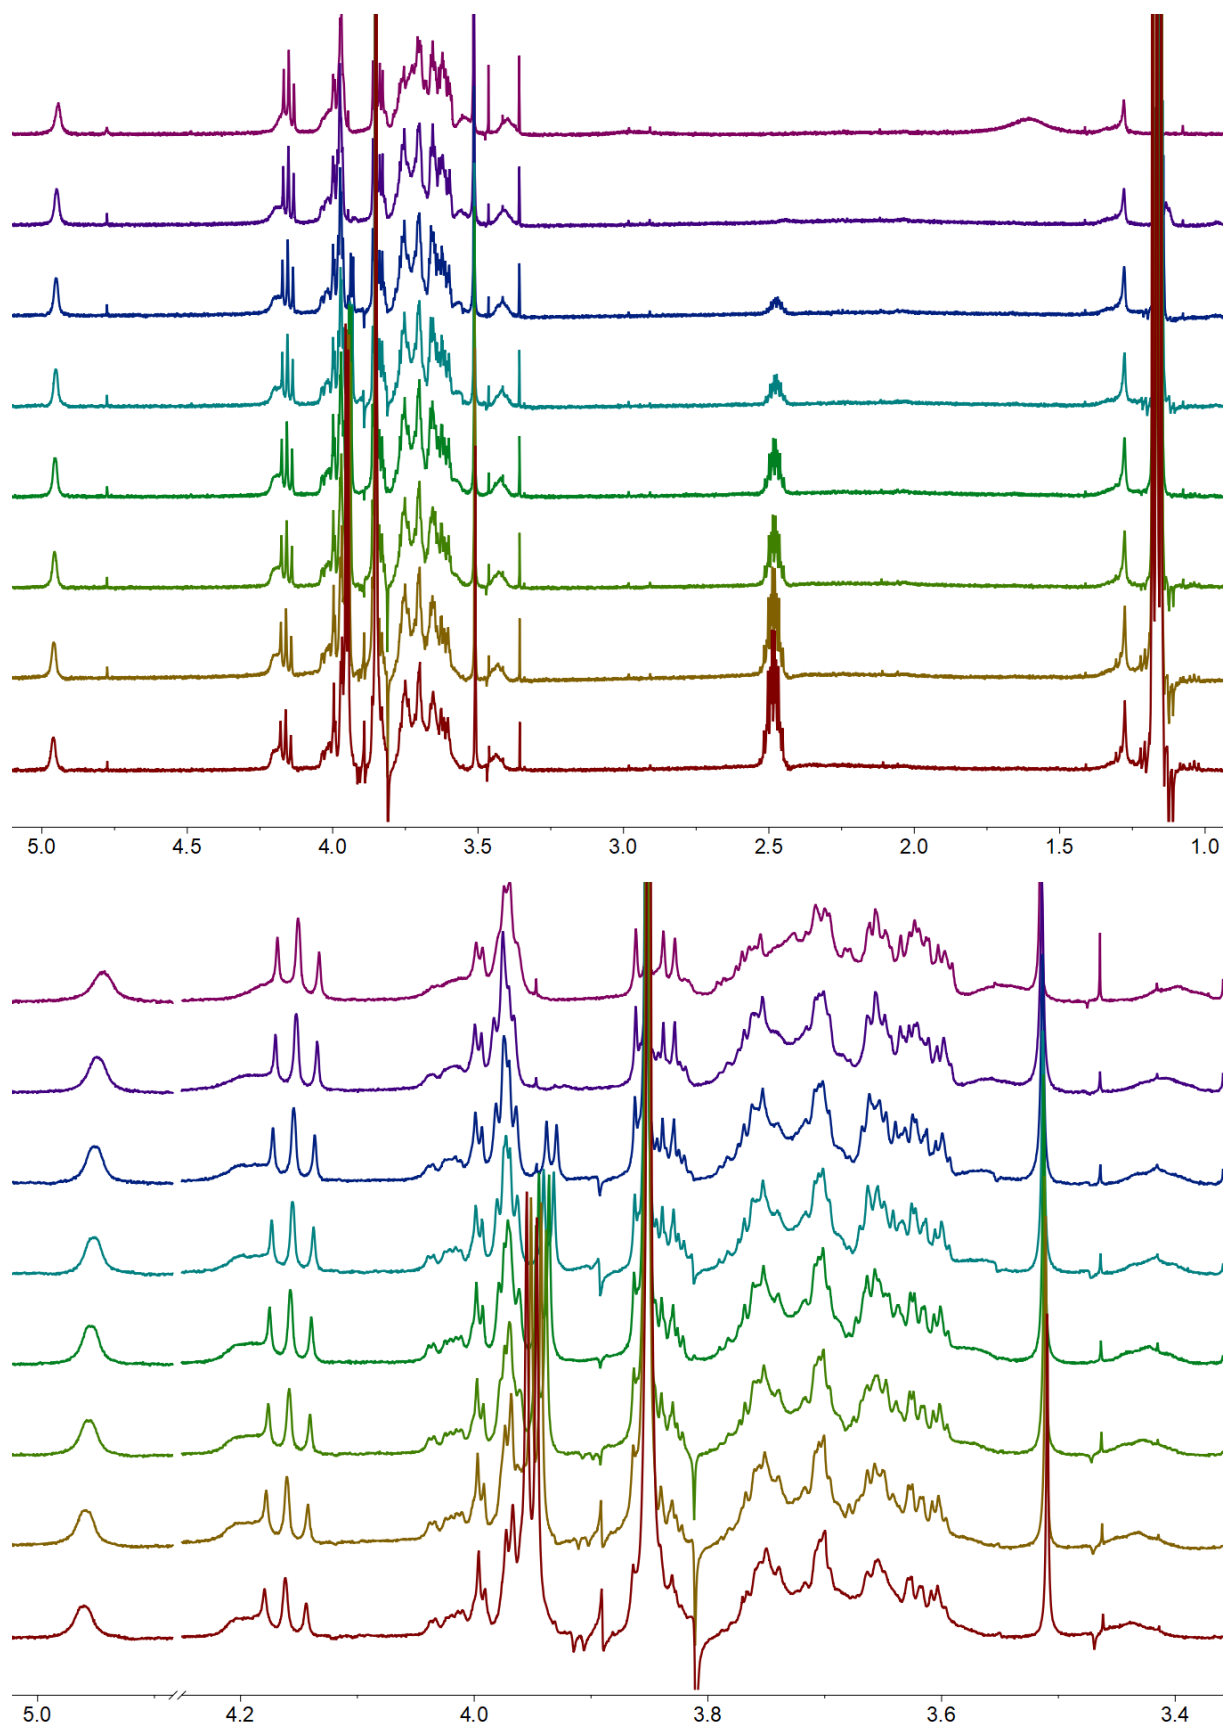

Summary of chemical shift changes:

| Titration | 4.15   | $\Delta$ ppm | 4      | $\Delta$ ppm | 3.86   | $\Delta$ ppm | 3.59   | $\Delta$ ppm |
|-----------|--------|--------------|--------|--------------|--------|--------------|--------|--------------|
| 0         | 4.1508 | 0.0000       | 4.0006 | 0.0000       | 3.8616 | 0.0000       | 3.5973 | 0.0000       |
| 1         | 4.1522 | 0.0014       | 3.9994 | 0.0012       | 3.8619 | 0.0003       | 3.5983 | 0.0010       |
| 2         | 4.154  | 0.0032       | 3.9988 | 0.0018       | 3.8624 | 0.0008       | 3.5992 | 0.0019       |
| 3         | 4.155  | 0.0042       | 3.9985 | 0.0021       | 3.8627 | 0.0011       | 3.5999 | 0.0026       |
| 4         | 4.1564 | 0.0056       | 3.9978 | 0.0028       | 3.8631 | 0.0015       | 3.6009 | 0.0036       |
| 5         | 4.1573 | 0.0065       | 3.9973 | 0.0033       | 3.8624 | 0.0008       | 3.6016 | 0.0043       |
| 6         | 4.1588 | 0.0080       | 3.9968 | 0.0038       | 3.8637 | 0.0021       | 3.6025 | 0.0052       |
| 7         | 4.1598 | 0.0090       | 3.9962 | 0.0044       | 3.8639 | 0.0023       | 3.6032 | 0.0059       |

Plot of chemical shift change vs guest concentration:

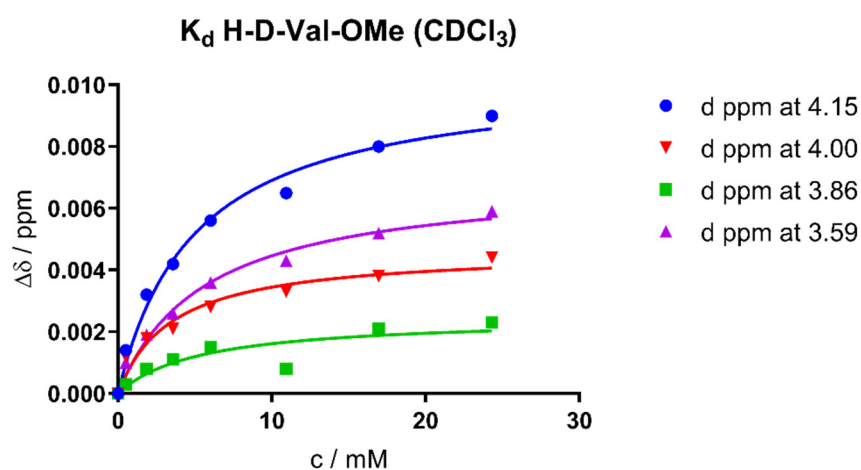

K<sub>d</sub> values obtained by fitting the data for selected protons into the single-site specific binding model:

|                      |        |        |        |        |
|----------------------|--------|--------|--------|--------|
| <b>K<sub>d</sub></b> | 5.68   | 3.57   | 5.11   | 5.54   |
| <b>R squared</b>     | 0.9756 | 0.9374 | 0.9867 | 0.9699 |

$$K_d = 4.98 \pm 0.84 \text{ mM} \rightarrow K_a = 201 \pm 34 \text{ M}^{-1}$$

**H-L-Asn-OMe x HCl to receptor 1:**

$^1\text{H}$  NMR spectra (top – full, bottom – enhanced view of the receptor signals in the spectra):

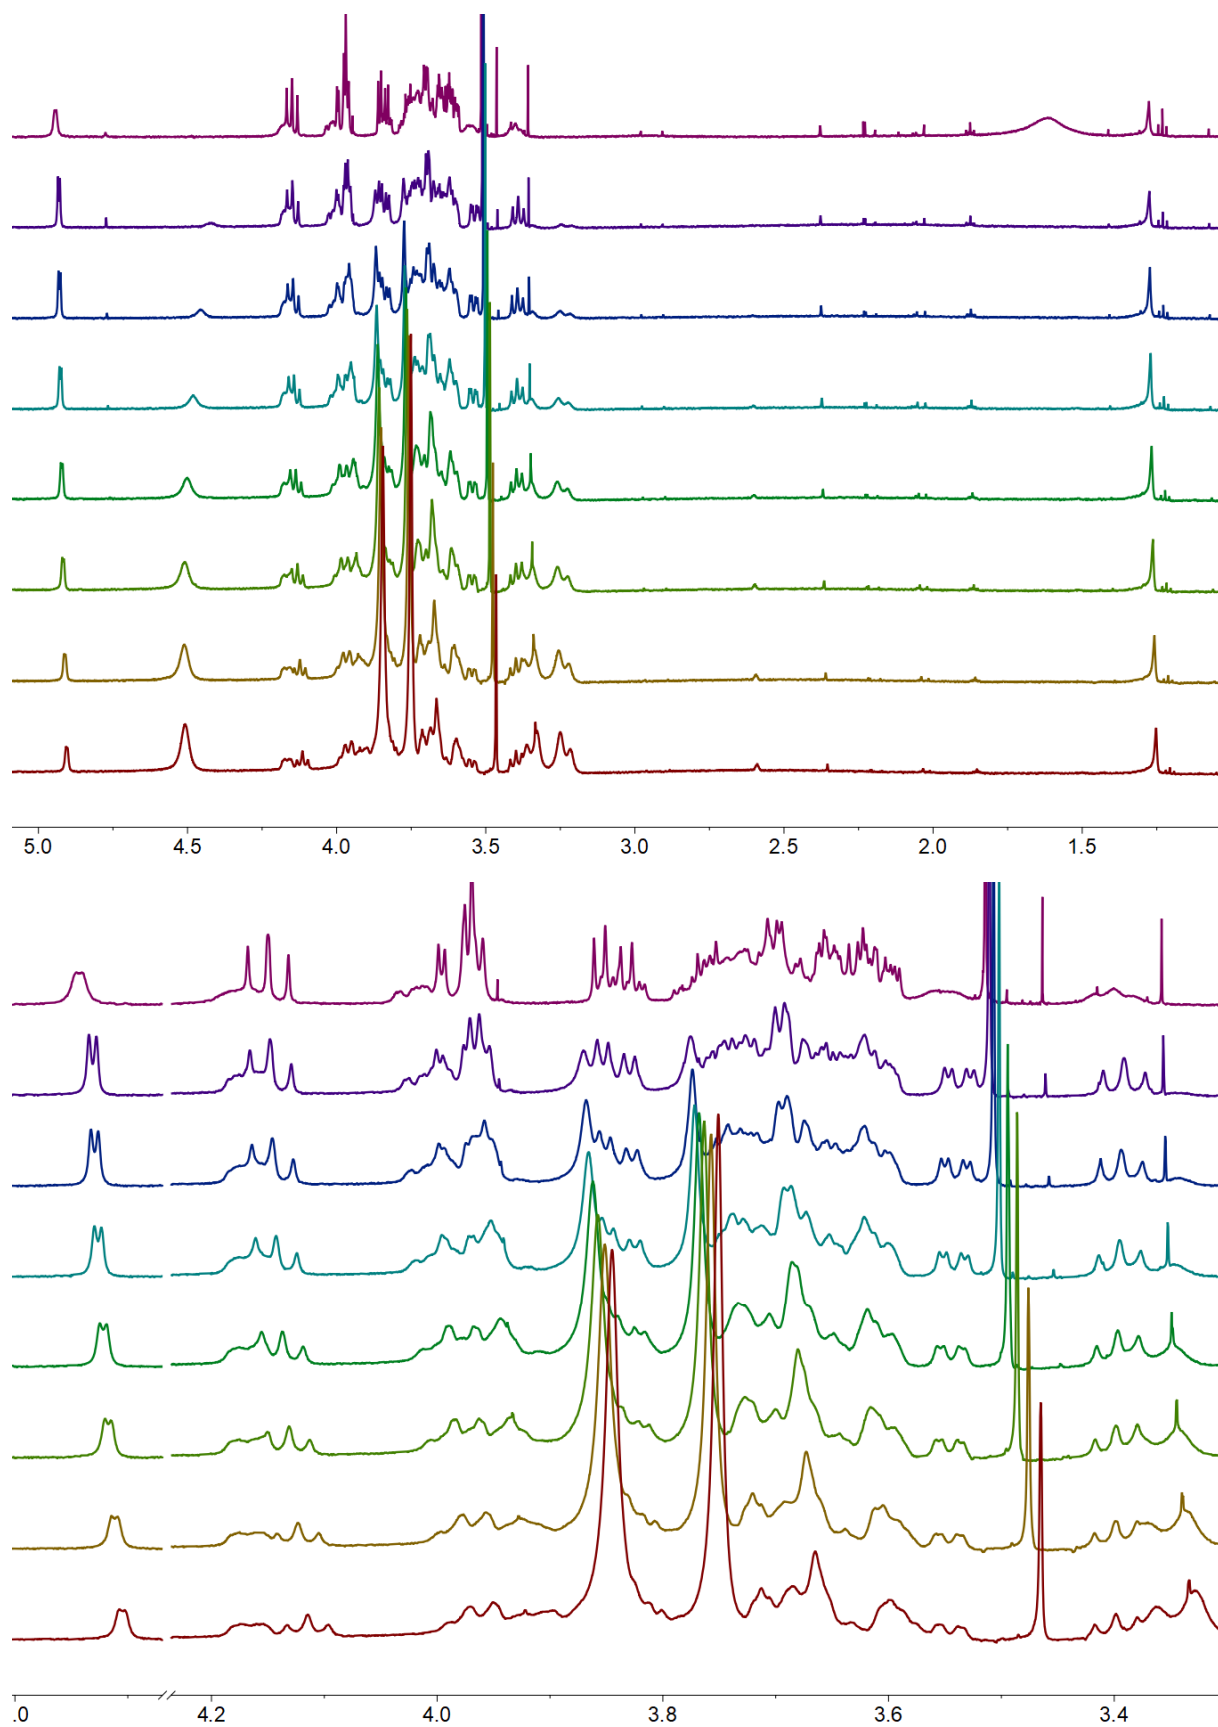



Summary of chemical shift changes:

| Titration | 4.94   | $\Delta$ ppm | 4.02   | $\Delta$ ppm | 3.53   | $\Delta$ ppm | 3.38   | $\Delta$ ppm |
|-----------|--------|--------------|--------|--------------|--------|--------------|--------|--------------|
| 0         | 4.9425 | 0.0000       | 4.0277 | 0.0000       | 3.5323 | 0.0000       | 3.3854 | 0.0000       |
| 1         | 4.9309 | 0.0116       | 4.0207 | 0.0070       | 3.5377 | 0.0054       | 3.3913 | 0.0059       |
| 2         | 4.9292 | 0.0133       | 4.0185 | 0.0092       | 3.5406 | 0.0083       | 3.3936 | 0.0082       |
| 3         | 4.9262 | 0.0163       | 4.0151 | 0.0126       | 3.5425 | 0.0102       | 3.3951 | 0.0097       |
| 4         | 4.9216 | 0.0209       | 4.0114 | 0.0163       | 3.545  | 0.0127       | 3.3970 | 0.0116       |
| 5         | 4.9161 | 0.0264       | 4.0075 | 0.0202       | 3.5458 | 0.0135       | 3.3977 | 0.0123       |
| 6         | 4.9123 | 0.0302       | 4.0029 | 0.0248       | 3.5461 | 0.0138       | 3.3982 | 0.0128       |
| 7         | 4.9079 | 0.0346       | 3.9975 | 0.0302       | 3.5468 | 0.0145       | 3.3987 | 0.0133       |

Plot of chemical shift change vs guest concentration:

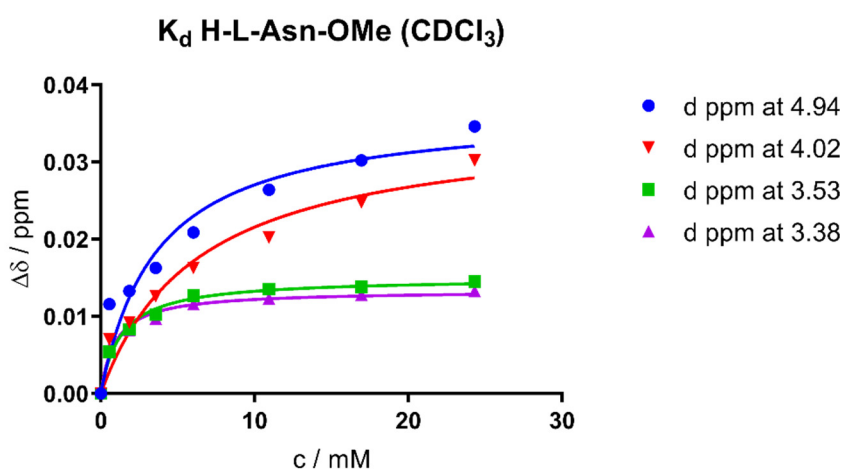

$K_d$  values obtained by fitting the data for selected protons into the single-site specific binding model:

|                         |        |        |        |        |
|-------------------------|--------|--------|--------|--------|
| <b><math>K_d</math></b> | 3.77   | 4.45   | 2.29   | 1.92   |
| <b>R squared</b>        | 0.9237 | 0.9522 | 0.9835 | 0.9768 |

$$K_d = 3.11 \pm 1.04 \text{ mM} \rightarrow K_a = 322 \pm 108 \text{ M}^{-1}$$

**H-D-Asn-OMe x HCl to receptor 1:**

$^1\text{H}$  NMR spectra (top – full, bottom – enhanced view of the receptor signals in the spectra):

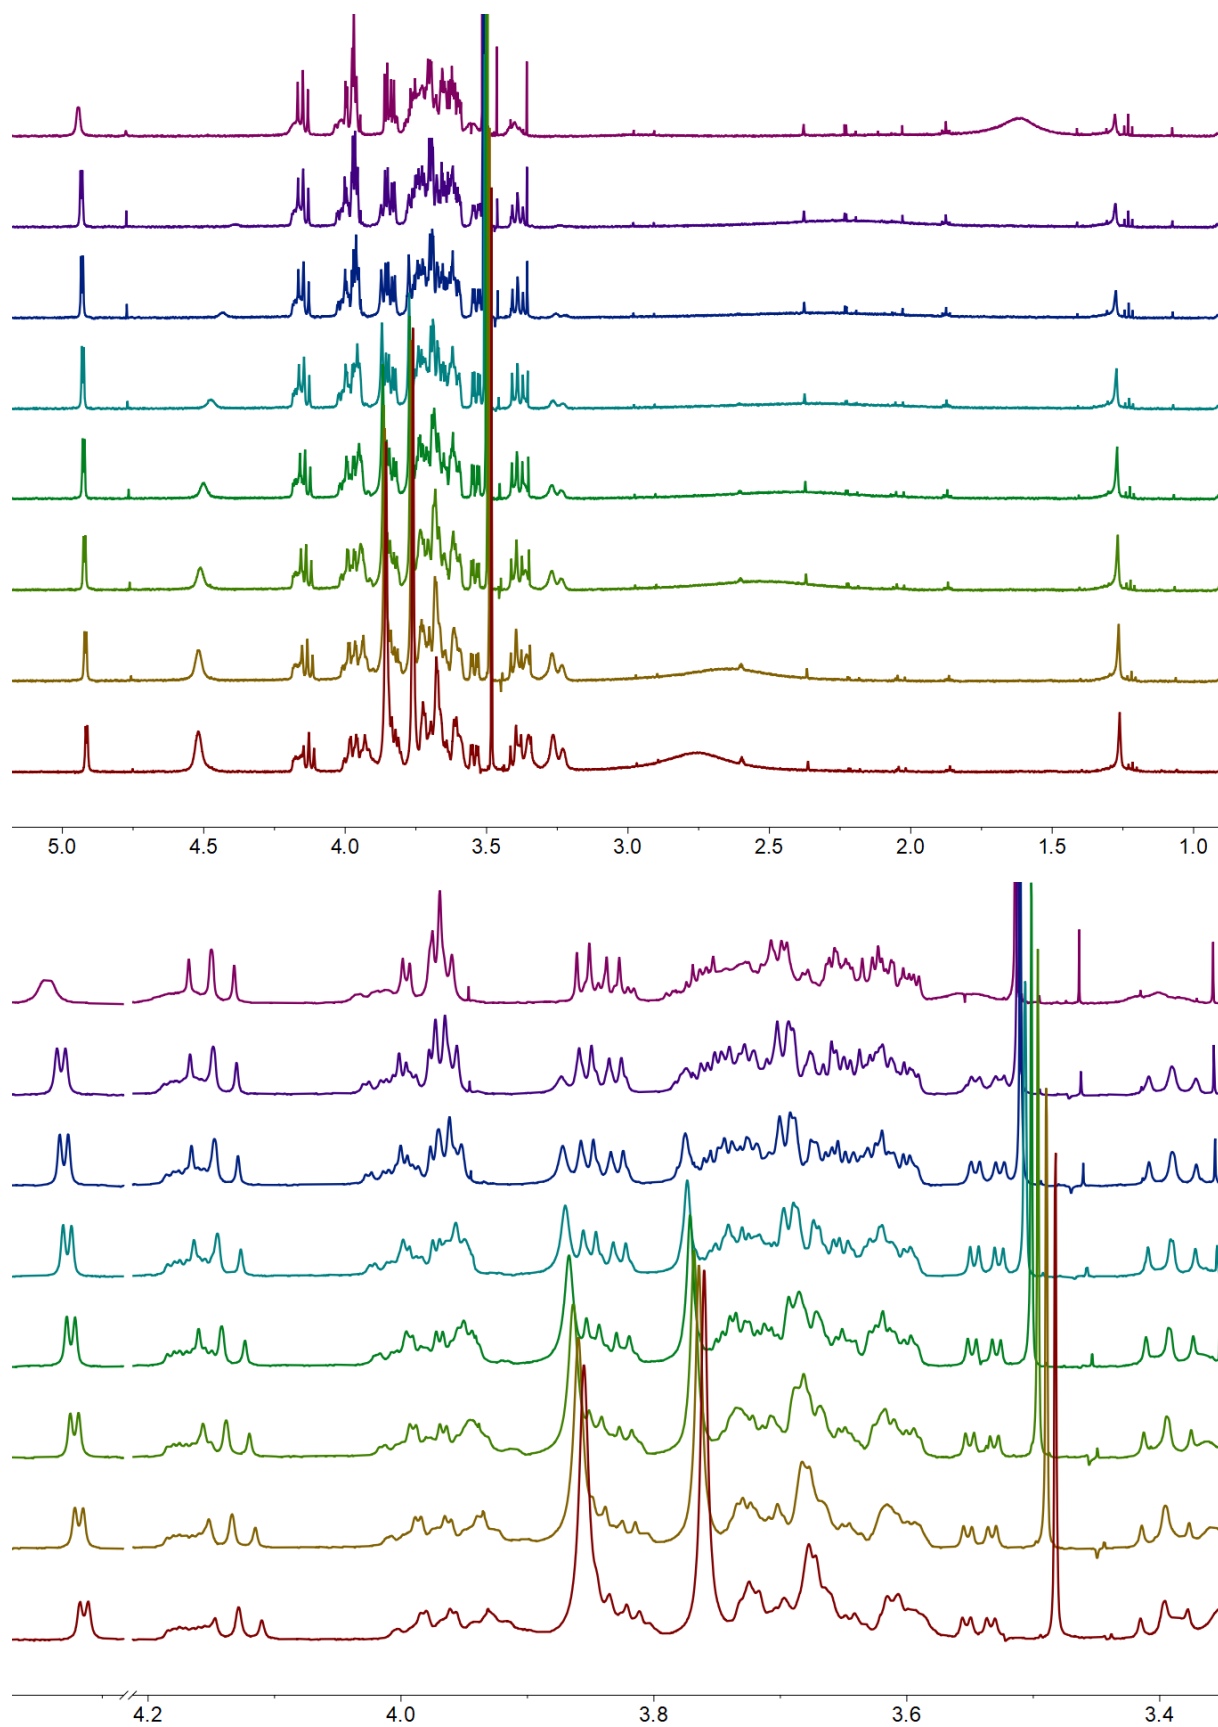

Summary of chemical shift changes:

| Titration | 4.94   | $\Delta$ ppm | 4.02   | $\Delta$ ppm | 3.53   | $\Delta$ ppm | 3.38   | $\Delta$ ppm |
|-----------|--------|--------------|--------|--------------|--------|--------------|--------|--------------|
| 0         | 4.944  | 0.0000       | 4.0277 | 0.0000       | 3.5312 | 0.0000       | 3.3826 | 0.0000       |
| 1         | 4.9324 | 0.0116       | 4.0207 | 0.0070       | 3.5354 | 0.0042       | 3.3881 | 0.0055       |
| 2         | 4.9303 | 0.0137       | 4.0185 | 0.0092       | 3.5363 | 0.0051       | 3.3897 | 0.0071       |
| 3         | 4.9273 | 0.0167       | 4.0151 | 0.0126       | 3.5374 | 0.0062       | 3.3905 | 0.0079       |
| 4         | 4.9245 | 0.0195       | 4.0114 | 0.0163       | 3.5396 | 0.0084       | 3.3922 | 0.0096       |
| 5         | 4.9222 | 0.0218       | 4.0075 | 0.0202       | 3.5409 | 0.0097       | 3.3941 | 0.0115       |
| 6         | 4.9183 | 0.0257       | 4.0029 | 0.0248       | 3.5423 | 0.0111       | 3.3954 | 0.0128       |
| 7         | 4.914  | 0.0300       | 3.9975 | 0.0302       | 3.5431 | 0.0119       | 3.3960 | 0.0134       |

Plot of chemical shift change vs guest concentration:

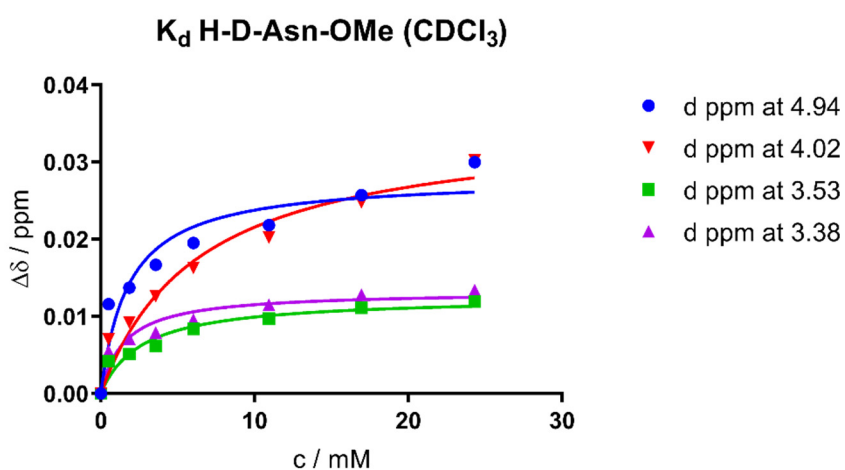

$K_d$  values obtained by fitting the data for selected protons into the single-site specific binding model:

|                         |        |        |        |        |
|-------------------------|--------|--------|--------|--------|
| <b><math>K_d</math></b> | 3.18   | 4.66   | 2.97   | 2.81   |
| <b>R squared</b>        | 0.8999 | 0.9522 | 0.9408 | 0.9328 |

$$K_d = 3.41 \pm 0.74 \text{ mM} \rightarrow K_a = 293 \pm 64 \text{ M}^{-1}$$

**H-L-Leu-OMe x HCl to receptor 1:**

$^1\text{H}$  NMR spectra (top – full, bottom – enhanced view of the receptor signals in the spectra):

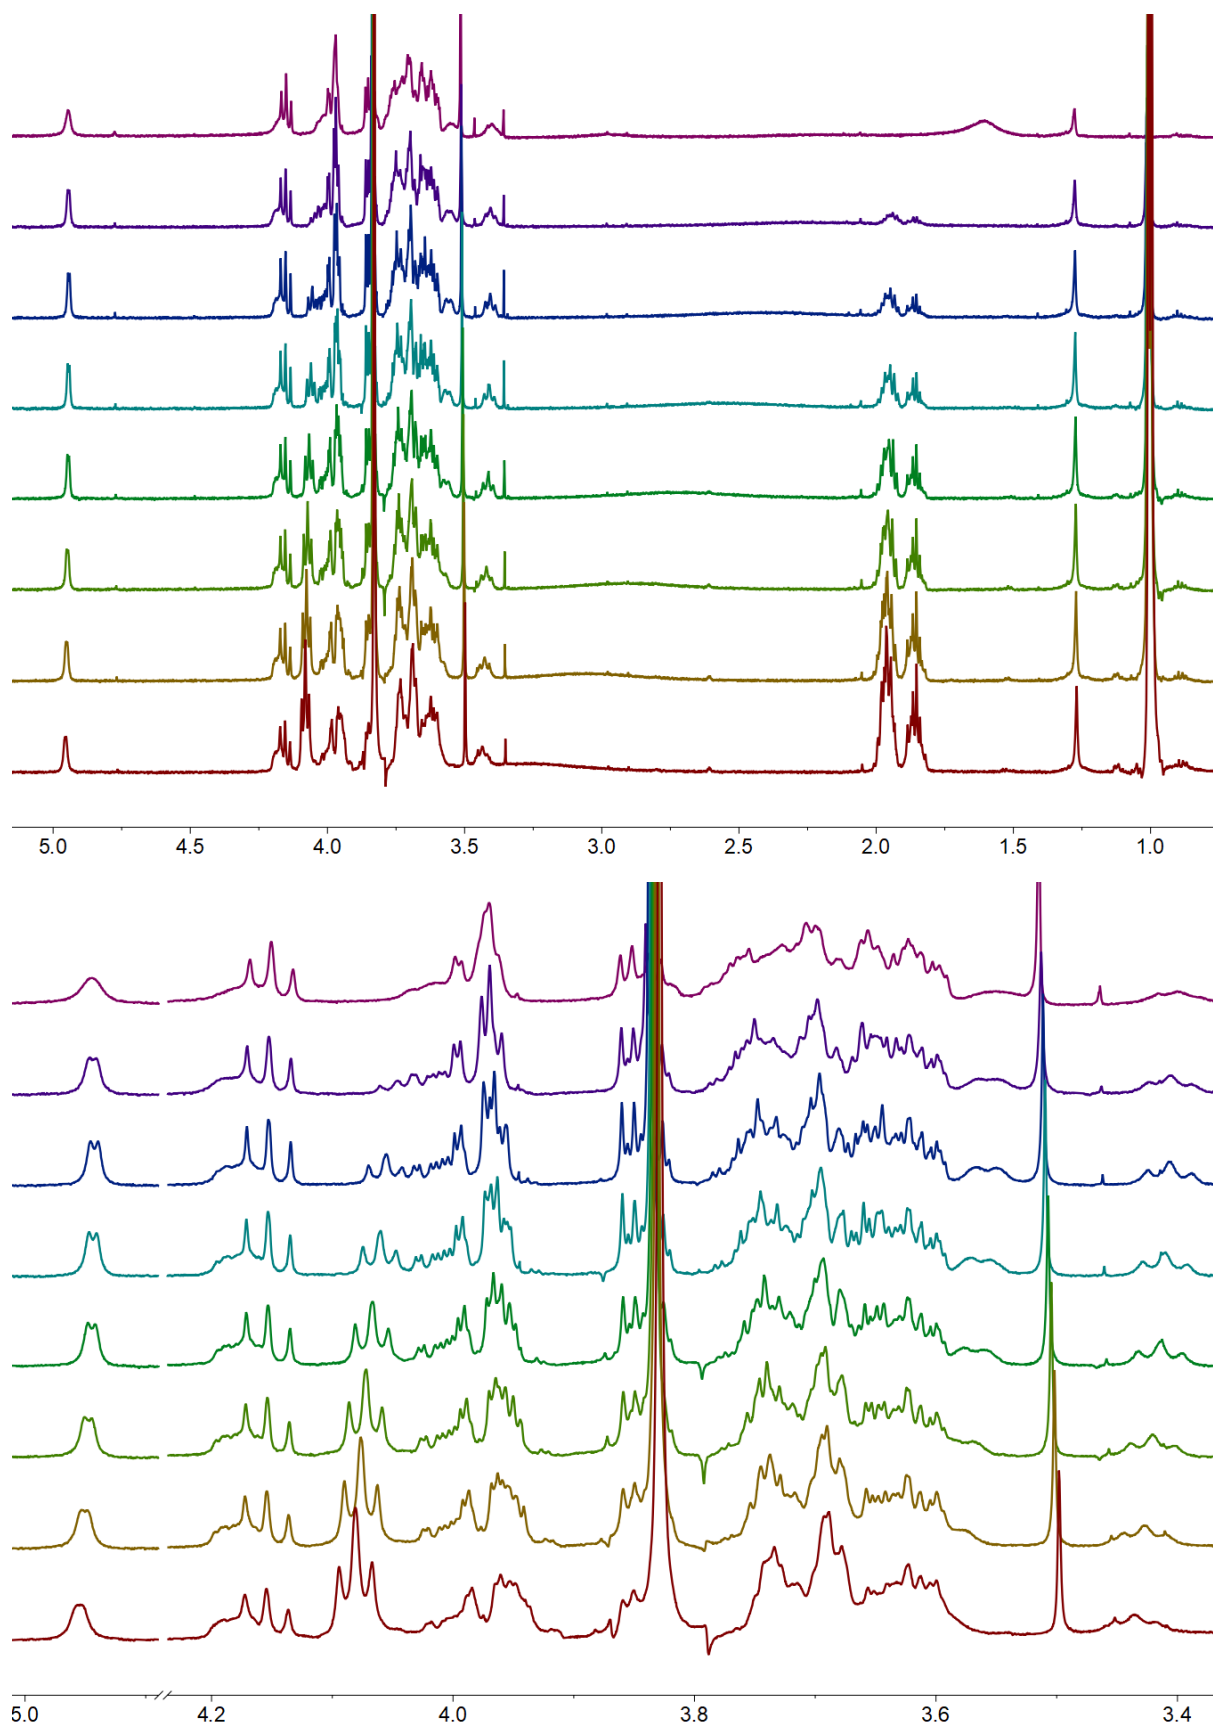

Summary of chemical shift changes:

| Titration | 4.15   | $\Delta$ ppm | 3.97   | $\Delta$ ppm | 3.77   | $\Delta$ ppm | 3.63   | $\Delta$ ppm |
|-----------|--------|--------------|--------|--------------|--------|--------------|--------|--------------|
| 0         | 4.1504 | 0.0000       | 3.9773 | 0.0000       | 3.771  | 0.0000       | 3.6256 | 0.0000       |
| 1         | 4.1524 | 0.0020       | 3.9724 | 0.0049       | 3.7661 | 0.0049       | 3.6300 | 0.0044       |
| 2         | 4.1528 | 0.0024       | 3.9706 | 0.0067       | 3.7633 | 0.0077       | 3.6311 | 0.0055       |
| 3         | 4.1532 | 0.0028       | 3.97   | 0.0073       | 3.7615 | 0.0095       | 3.6315 | 0.0059       |
| 4         | 4.1533 | 0.0029       | 3.9694 | 0.0079       | 3.7588 | 0.0122       | 3.6320 | 0.0064       |
| 5         | 4.1538 | 0.0034       | 3.9679 | 0.0094       | 3.7567 | 0.0143       | 3.6327 | 0.0071       |
| 6         | 4.1542 | 0.0038       | 3.9663 | 0.0110       | 3.7545 | 0.0165       | 3.6329 | 0.0073       |
| 7         | 4.1546 | 0.0042       | 3.964  | 0.0133       | 3.7522 | 0.0188       | 3.6330 | 0.0074       |

Plot of chemical shift change vs guest concentration:

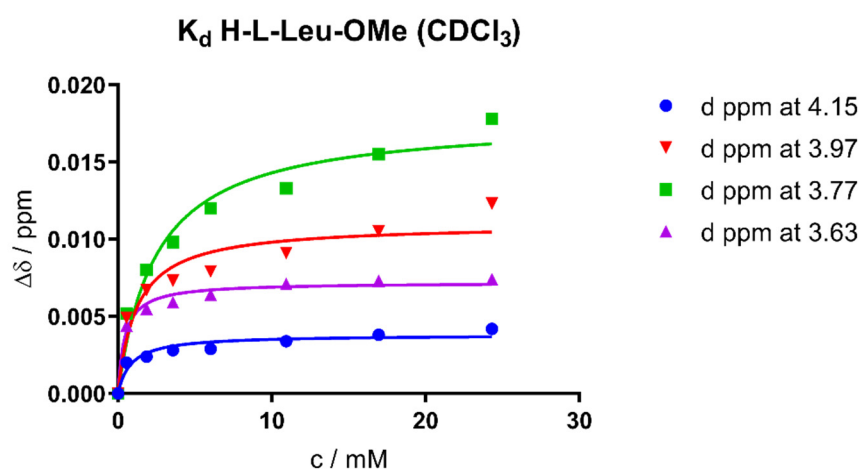

K<sub>d</sub> values obtained by fitting the data for selected protons into the single-site specific binding model:

|                      |        |        |        |        |
|----------------------|--------|--------|--------|--------|
| <b>K<sub>d</sub></b> | 0.94   | 1.4    | 1.91   | 0.53   |
| <b>R squared</b>     | 0.9155 | 0.8859 | 0.9665 | 0.9755 |

$$K_d = 1.20 \pm 0.51 \text{ mM} \rightarrow K_a = 833 \pm 354 \text{ M}^{-1}$$

**H-D-Leu-OMe x HCl to receptor 1:**

$^1\text{H}$  NMR spectra (top – full, bottom – enhanced view of the receptor signals in the spectra):

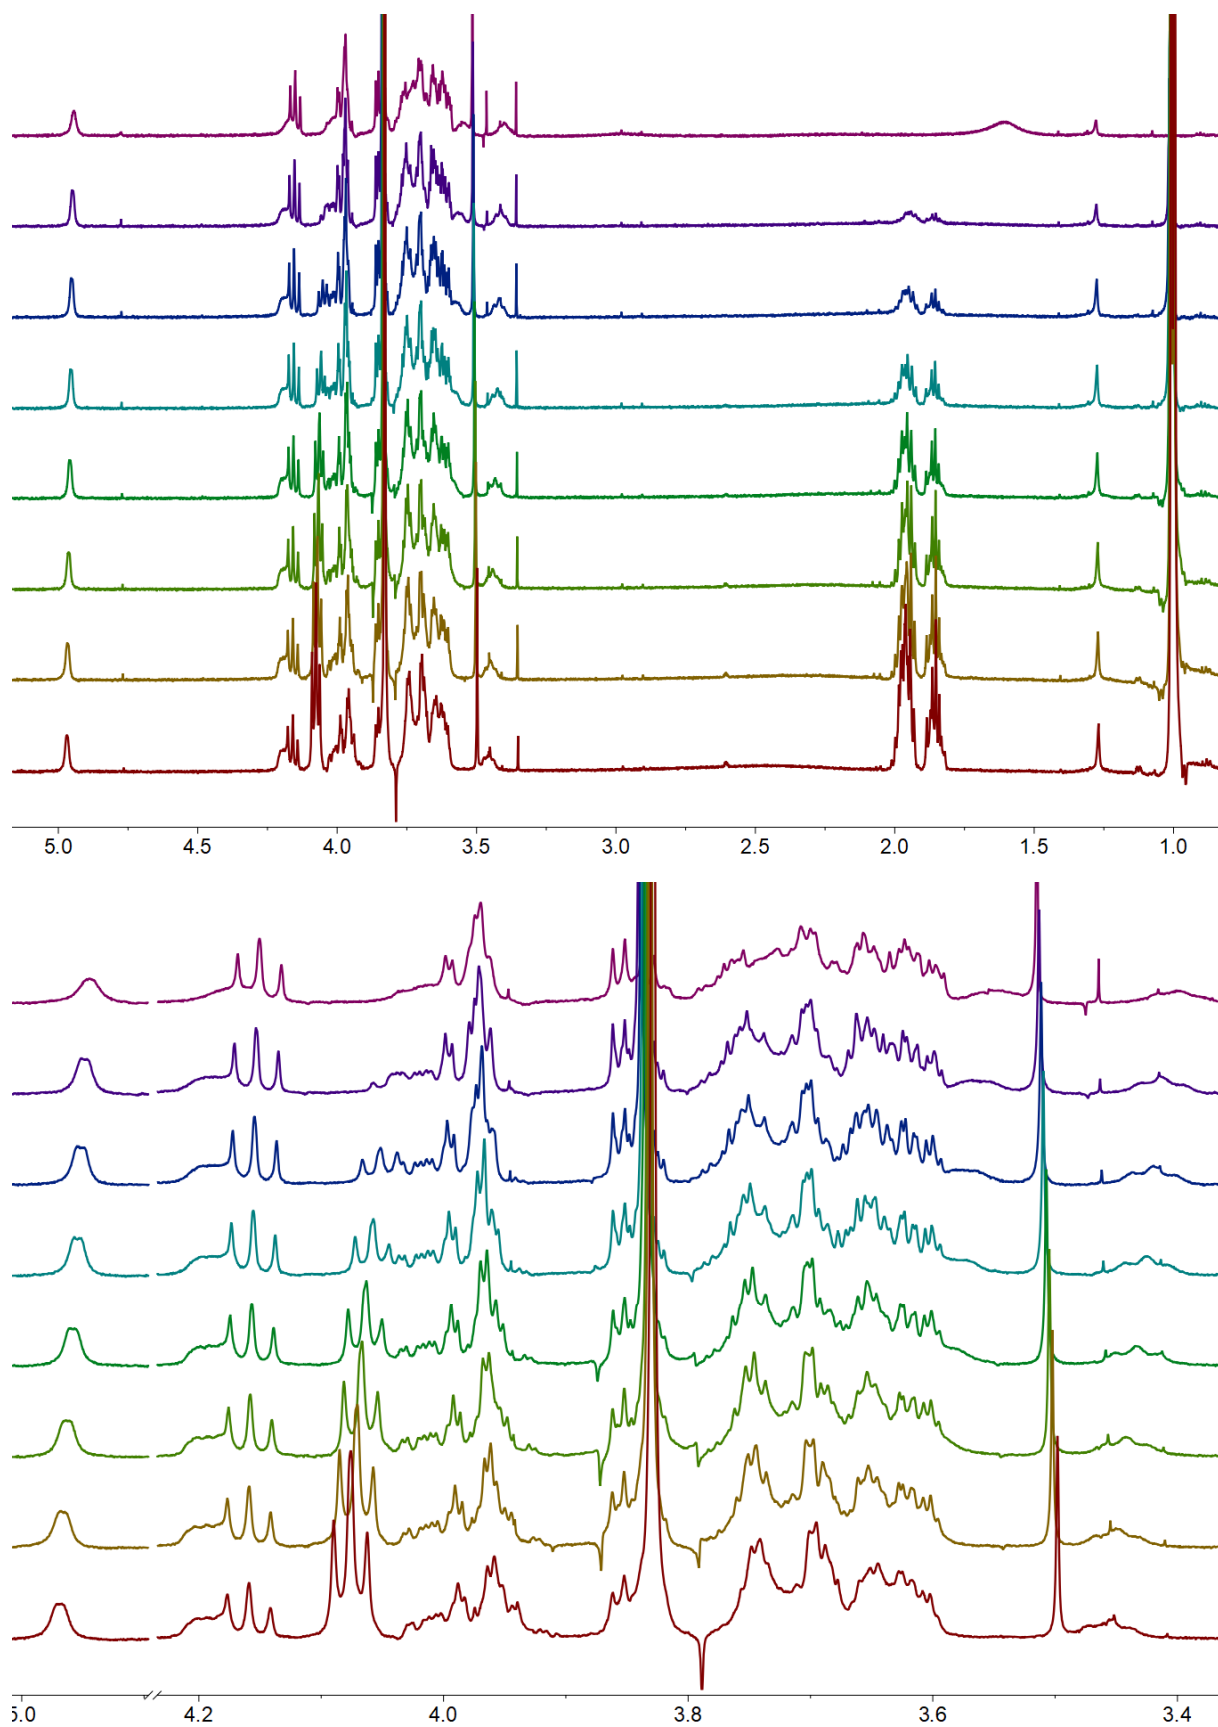

Summary of chemical shift changes:

| Titration | 4.94   | $\Delta$ ppm | 4.15   | $\Delta$ ppm | 3.97   | $\Delta$ ppm | 3.77   | $\Delta$ ppm |
|-----------|--------|--------------|--------|--------------|--------|--------------|--------|--------------|
| 0         | 4.9445 | 0.0000       | 4.1502 | 0.0000       | 3.9736 | 0.0000       | 3.7708 | 0.0000       |
| 1         | 4.949  | 0.0045       | 4.153  | 0.0028       | 3.9705 | 0.0031       | 3.7678 | 0.0030       |
| 2         | 4.9521 | 0.0076       | 4.1547 | 0.0045       | 3.9682 | 0.0054       | 3.7661 | 0.0047       |
| 3         | 4.955  | 0.0105       | 4.1556 | 0.0054       | 3.9666 | 0.0070       | 3.7649 | 0.0059       |
| 4         | 4.9582 | 0.0137       | 4.1566 | 0.0064       | 3.9644 | 0.0092       | 3.7632 | 0.0076       |
| 5         | 4.9631 | 0.0186       | 4.1578 | 0.0076       | 3.9625 | 0.0111       | 3.7614 | 0.0094       |
| 6         | 4.9661 | 0.0216       | 4.1588 | 0.0086       | 3.9617 | 0.0119       | 3.7599 | 0.0109       |
| 7         | 4.9677 | 0.0232       | 4.159  | 0.0088       | 3.9607 | 0.0129       | 3.7582 | 0.0126       |

Plot of chemical shift change vs guest concentration:

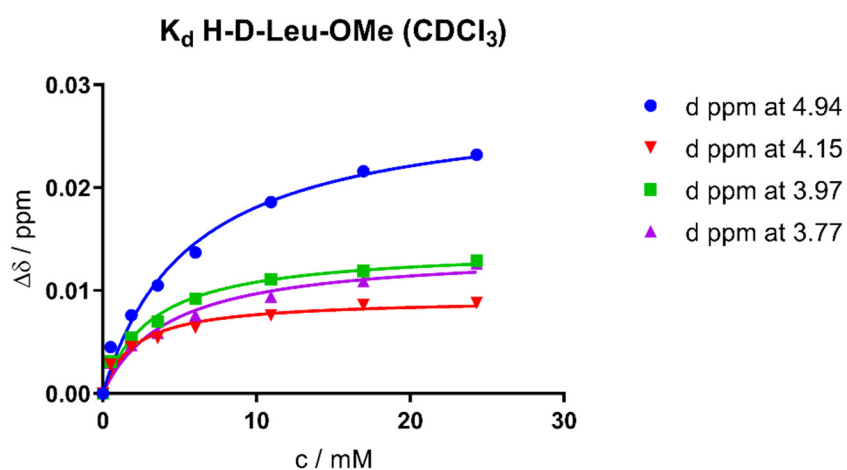

K<sub>d</sub> values obtained by fitting the data for selected protons into the single-site specific binding model:

|                      |        |        |        |        |
|----------------------|--------|--------|--------|--------|
| <b>K<sub>d</sub></b> | 5.79   | 2.09   | 3.21   | 4.42   |
| <b>R squared</b>     | 0.9875 | 0.9741 | 0.9882 | 0.9677 |

$$K_d = 3.88 \pm 1.37 \text{ mM} \rightarrow K_a = 258 \pm 91 \text{ M}^{-1}$$

**H-L-tLeu-OMe x HCl to receptor 1:**

$^1\text{H}$  NMR spectra (top – full, bottom – enhanced view of the receptor signals in the spectra):

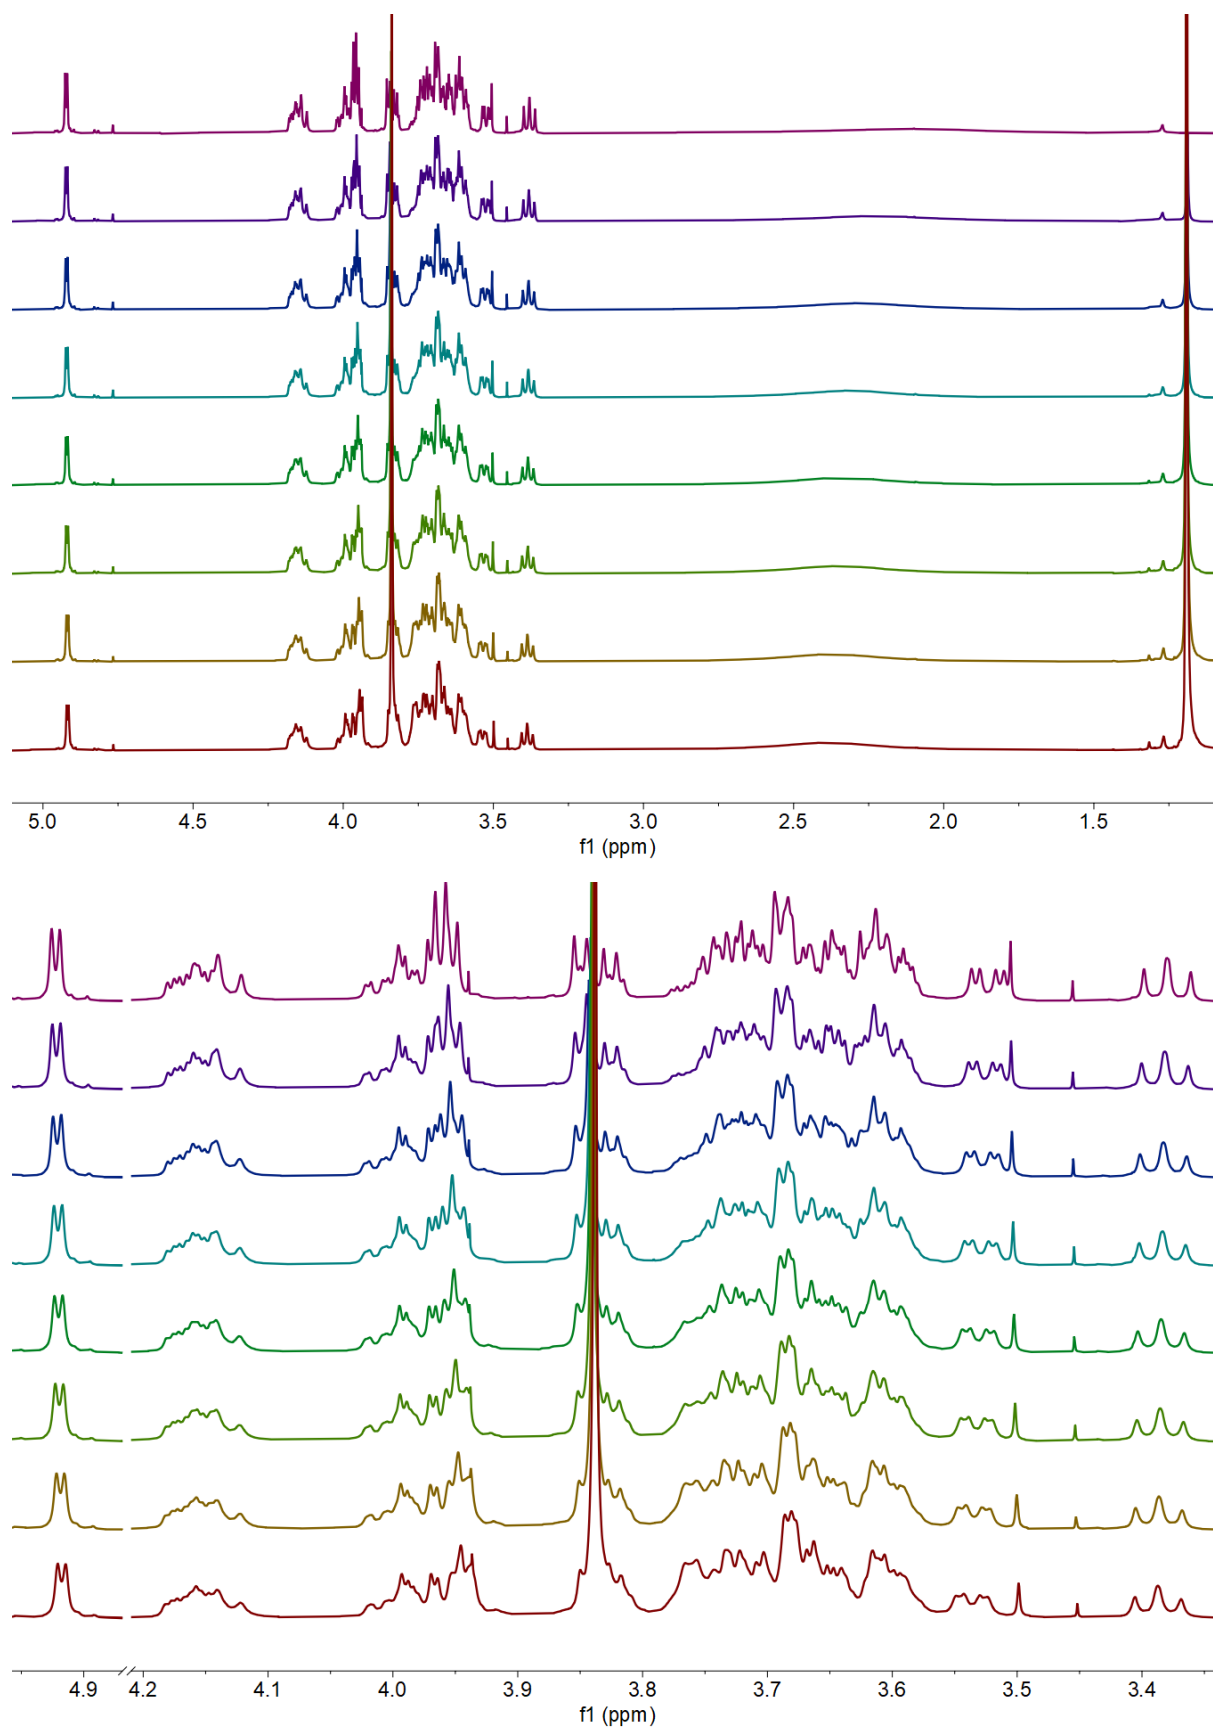



Summary of chemical shift changes:

| Titration | 4.11   | $\Delta$ ppm | 3.96   | $\Delta$ ppm | 3.74   | $\Delta$ ppm | 3.69   | $\Delta$ ppm |
|-----------|--------|--------------|--------|--------------|--------|--------------|--------|--------------|
| 0         | 4.1406 | 0.0000       | 3.9621 | 0.0000       | 3.7435 | 0.0000       | 3.6902 | 0.0000       |
| 1         | 4.1428 | 0.0022       | 3.9593 | 0.0028       | 3.7411 | 0.0024       | 3.6884 | 0.0018       |
| 2         | 4.1433 | 0.0027       | 3.9572 | 0.0049       | 3.7385 | 0.0050       | 3.6873 | 0.0029       |
| 3         | 4.1437 | 0.0031       | 3.9563 | 0.0058       | 3.7372 | 0.0063       | 3.6868 | 0.0034       |
| 4         | 4.1441 | 0.0035       | 3.9553 | 0.0068       | 3.7366 | 0.0069       | 3.6856 | 0.0046       |
| 5         | 4.1444 | 0.0038       | 3.9544 | 0.0077       | 3.7357 | 0.0078       | 3.6857 | 0.0045       |
| 6         | 4.1447 | 0.0041       | 3.9537 | 0.0084       | 3.735  | 0.0085       | 3.6851 | 0.0051       |
| 7         | 4.145  | 0.0044       | 3.953  | 0.0091       | 3.7342 | 0.0093       | 3.6846 | 0.0056       |

Plot of chemical shift change vs guest concentration:

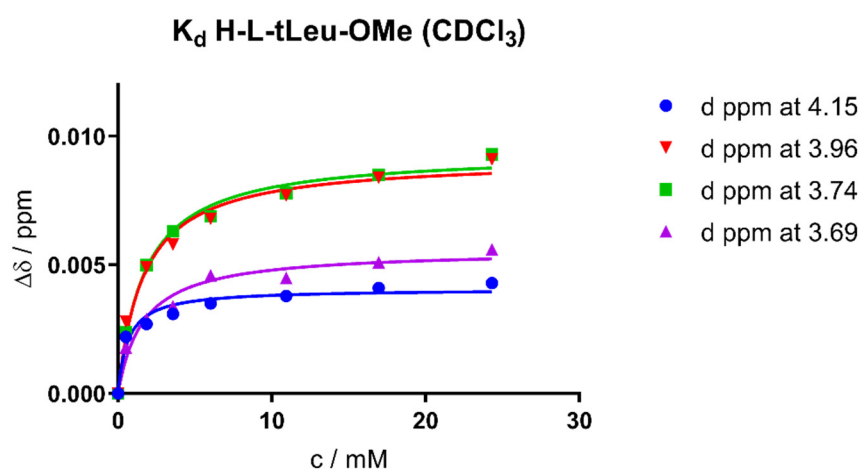

$K_d$  values obtained by fitting the data for selected protons into the single-site specific binding model:

|                         |        |        |        |        |
|-------------------------|--------|--------|--------|--------|
| <b><math>K_d</math></b> | 0.66   | 1.86   | 1.92   | 1.25   |
| <b>R squared</b>        | 0.9546 | 0.9904 | 0.9908 | 0.9495 |

$$K_d = 1.43 \pm 0.51 \text{ mM} \rightarrow K_a = 699 \pm 249 \text{ M}^{-1}$$

**H-D-tLeu-OMe x HCl to receptor 1:**

$^1\text{H}$  NMR spectra (top – full, bottom – enhanced view of the receptor signals in the spectra):

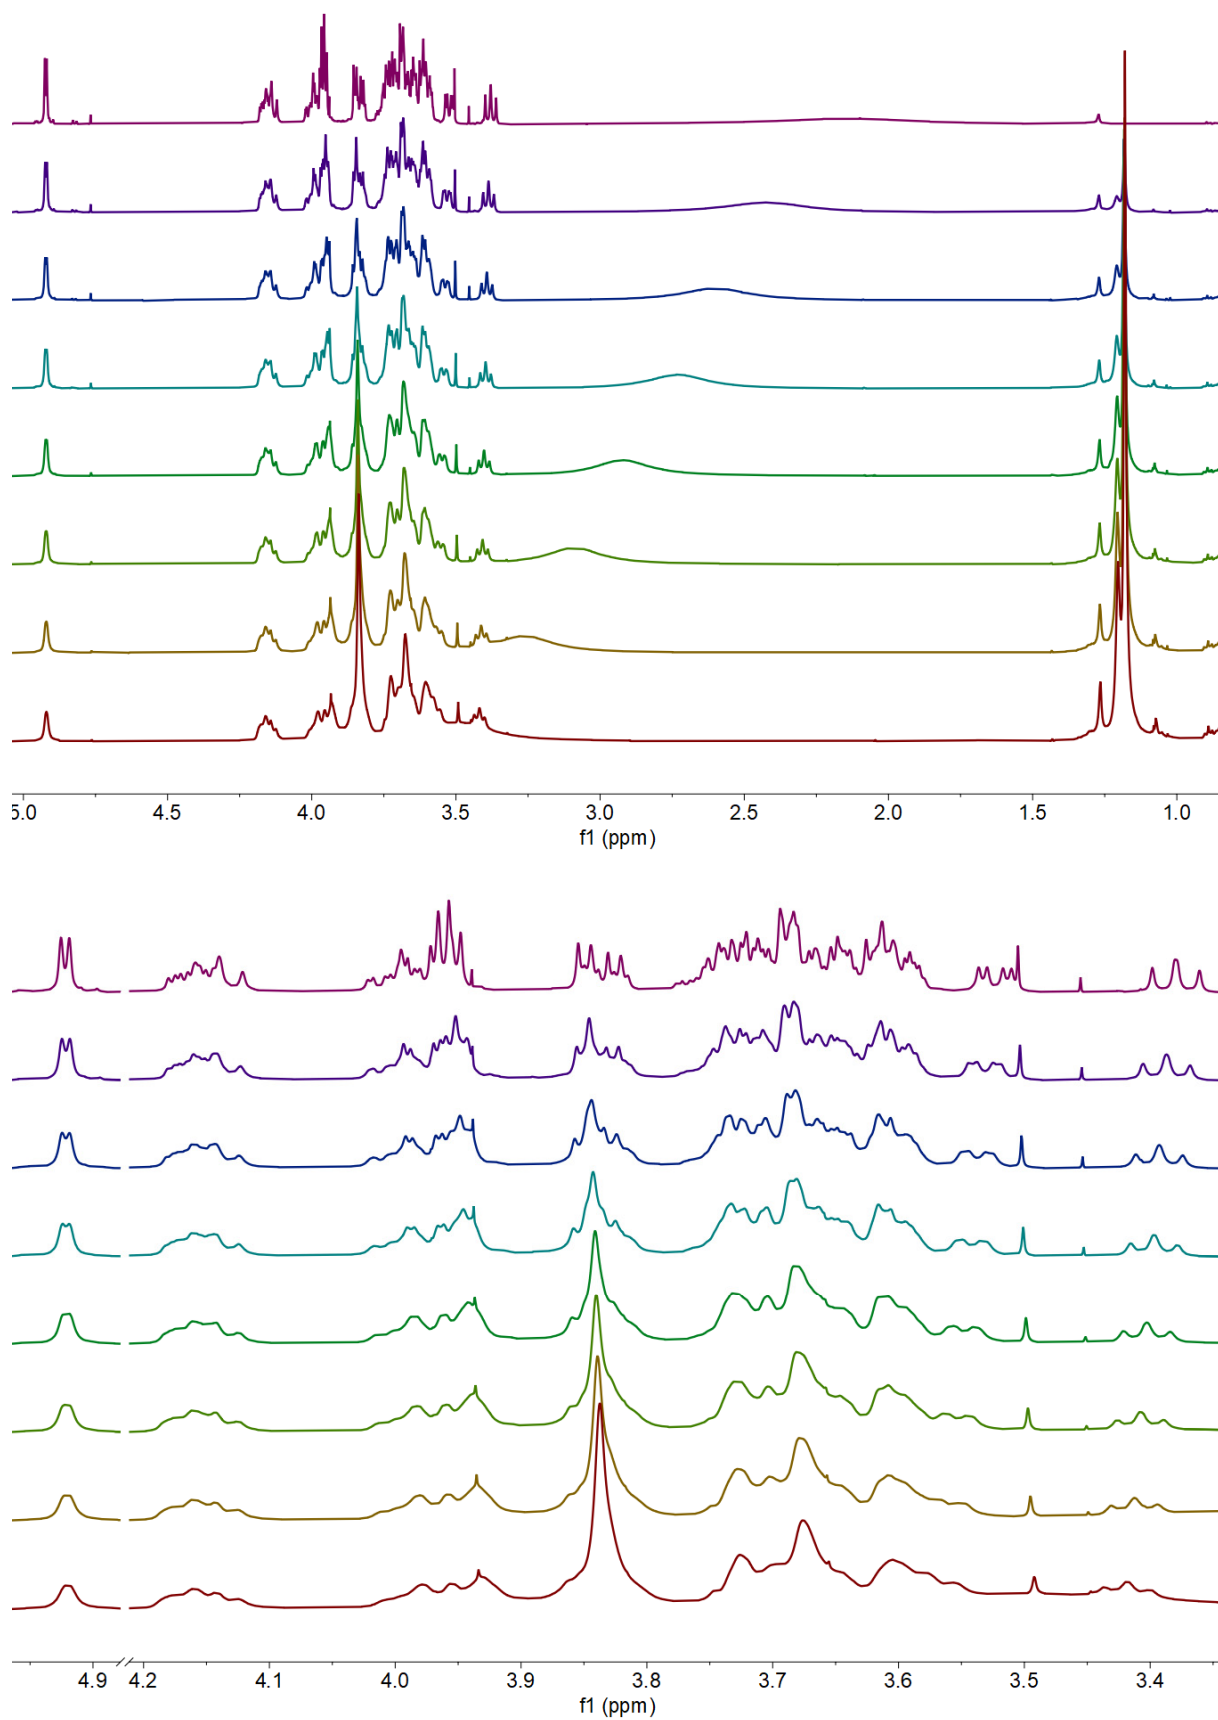

Summary of chemical shift changes:

| Titration | 4.14   | $\Delta$ ppm | 3.96   | $\Delta$ ppm | 3.74   | $\Delta$ ppm | 3.69   | $\Delta$ ppm |
|-----------|--------|--------------|--------|--------------|--------|--------------|--------|--------------|
| 0         | 4.1428 | 0.0000       | 3.9766 | 0.0000       | 3.7401 | 0.0000       | 3.6893 | 0.0000       |
| 1         | 4.1436 | 0.0008       | 3.9747 | 0.0019       | 3.7376 | 0.0025       | 3.6873 | 0.0020       |
| 2         | 4.1445 | 0.0017       | 3.974  | 0.0026       | 3.7355 | 0.0046       | 3.6852 | 0.0041       |
| 3         | 4.1456 | 0.0028       | 3.9729 | 0.0037       | 3.7332 | 0.0069       | 3.6834 | 0.0059       |
| 4         | 4.1466 | 0.0038       | 3.971  | 0.0056       | 3.7318 | 0.0083       | 3.6815 | 0.0078       |
| 5         | 4.1475 | 0.0047       | 3.9695 | 0.0071       | 3.7299 | 0.0102       | 3.6795 | 0.0098       |
| 6         | 4.1483 | 0.0055       | 3.9678 | 0.0088       | 3.7277 | 0.0124       | 3.6775 | 0.0118       |
| 7         | 4.1495 | 0.0067       | 3.9651 | 0.0115       | 3.7257 | 0.0144       | 3.6754 | 0.0139       |

Plot of chemical shift change vs guest concentration:

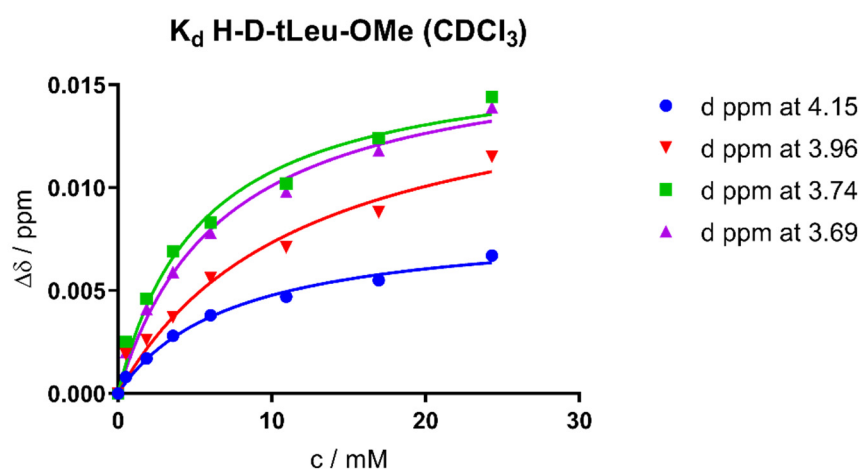

$K_d$  values obtained by fitting the data for selected protons into the single-site specific binding model:

|                         |        |        |        |        |
|-------------------------|--------|--------|--------|--------|
| <b><math>K_d</math></b> | 5.77   | 11.11  | 7.79   | 7.71   |
| <b>R squared</b>        | 0.9799 | 0.9689 | 0.9893 | 0.9876 |

$$K_d = 8.10 \pm 1.92 \text{ mM} \rightarrow K_a = 123 \pm 29 \text{ M}^{-1}$$

## 4.2 Titrations in CD<sub>3</sub>CN.

### H-L-Ala-OMe x HCl to receptor 1:

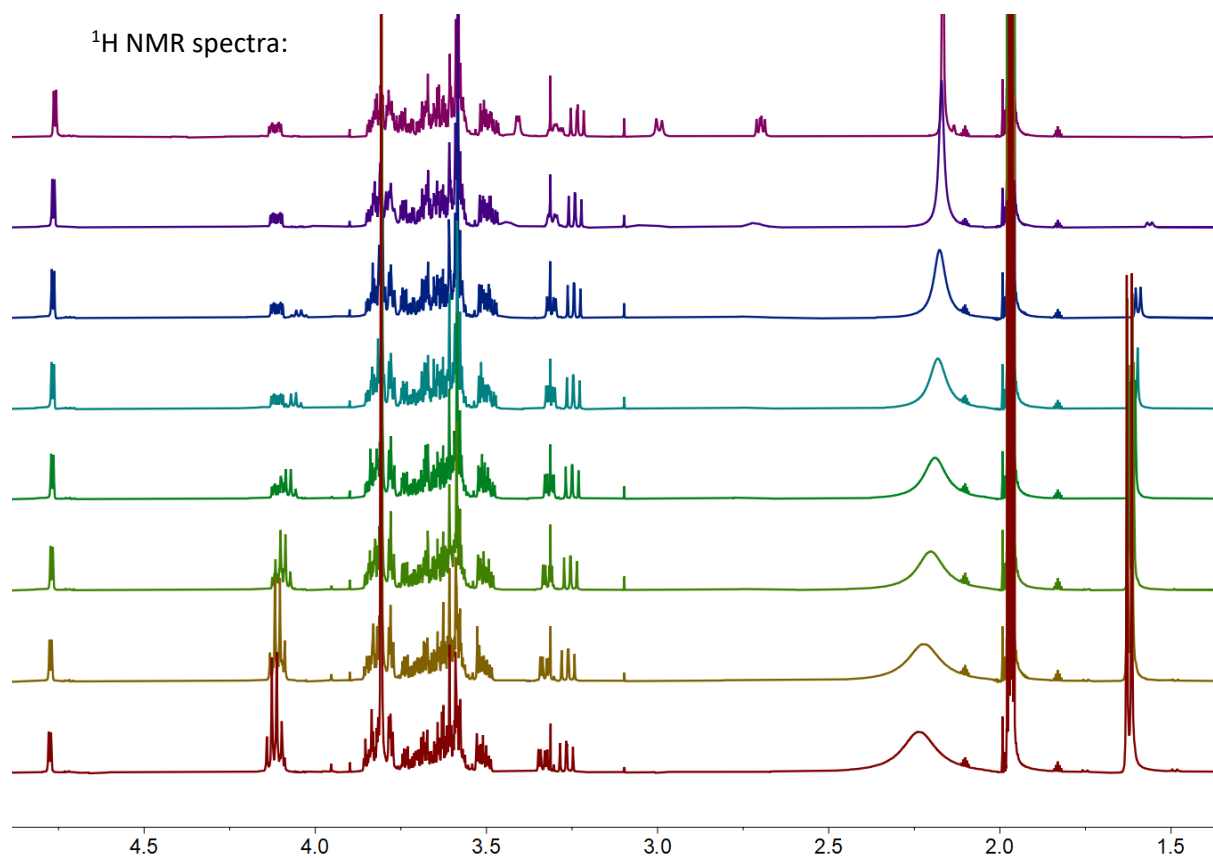

Summary of chemical shift changes:

| Titration | 4.76   | Δppm   | 4.12   | Δppm   | 3.74   | Δppm   | 3.72   | Δppm   |
|-----------|--------|--------|--------|--------|--------|--------|--------|--------|
| 0         | 4.7606 | 0.0000 | 4.1003 | 0.0000 | 3.7449 | 0.0000 | 3.7221 | 0.0000 |
| 1         | 4.7651 | 0.0045 | 4.0968 | 0.0035 | 3.7423 | 0.0026 | 3.72   | 0.0021 |
| 2         | 4.7661 | 0.0055 | 4.095  | 0.0053 | 3.741  | 0.0039 | 3.7185 | 0.0036 |
| 3         | 4.7671 | 0.0065 | 4.0937 | 0.0066 | 3.7405 | 0.0044 | 3.7173 | 0.0048 |
| 4         | 4.7682 | 0.0076 | 4.0923 | 0.0080 | 3.7395 | 0.0054 | 3.7166 | 0.0055 |
| 5         | 4.7704 | 0.0098 | 4.0912 | 0.0091 | 3.7388 | 0.0061 | 3.7157 | 0.0064 |
| 6         | 4.7732 | 0.0126 | 4.0898 | 0.0105 | 3.7381 | 0.0068 | 3.7152 | 0.0069 |
| 7         | 4.7749 | 0.0143 | 4.089  | 0.0113 | 3.7377 | 0.0072 | 3.7149 | 0.0072 |

Plot of chemical shift change vs guest concentration:

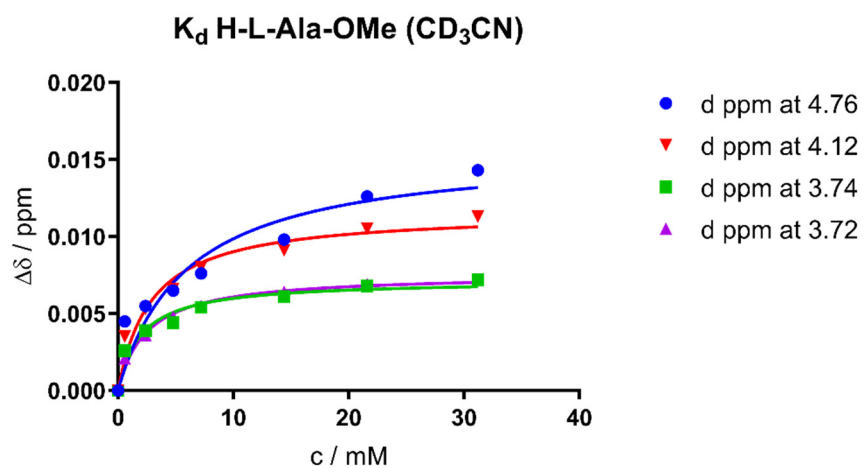

K<sub>d</sub> values obtained by fitting the data for selected protons into the single-site specific binding model:

|                      |        |        |        |        |
|----------------------|--------|--------|--------|--------|
| <b>K<sub>d</sub></b> | 5.05   | 3.24   | 2.24   | 2.81   |
| <b>R squared</b>     | 0.9038 | 0.9679 | 0.9639 | 0.9897 |

$$K_d = 3.34 \pm 1.05 \text{ mM} \rightarrow K_a = 299 \pm 94 \text{ M}^{-1}$$

# H-D-Ala-OMe x HCl to receptor 1:

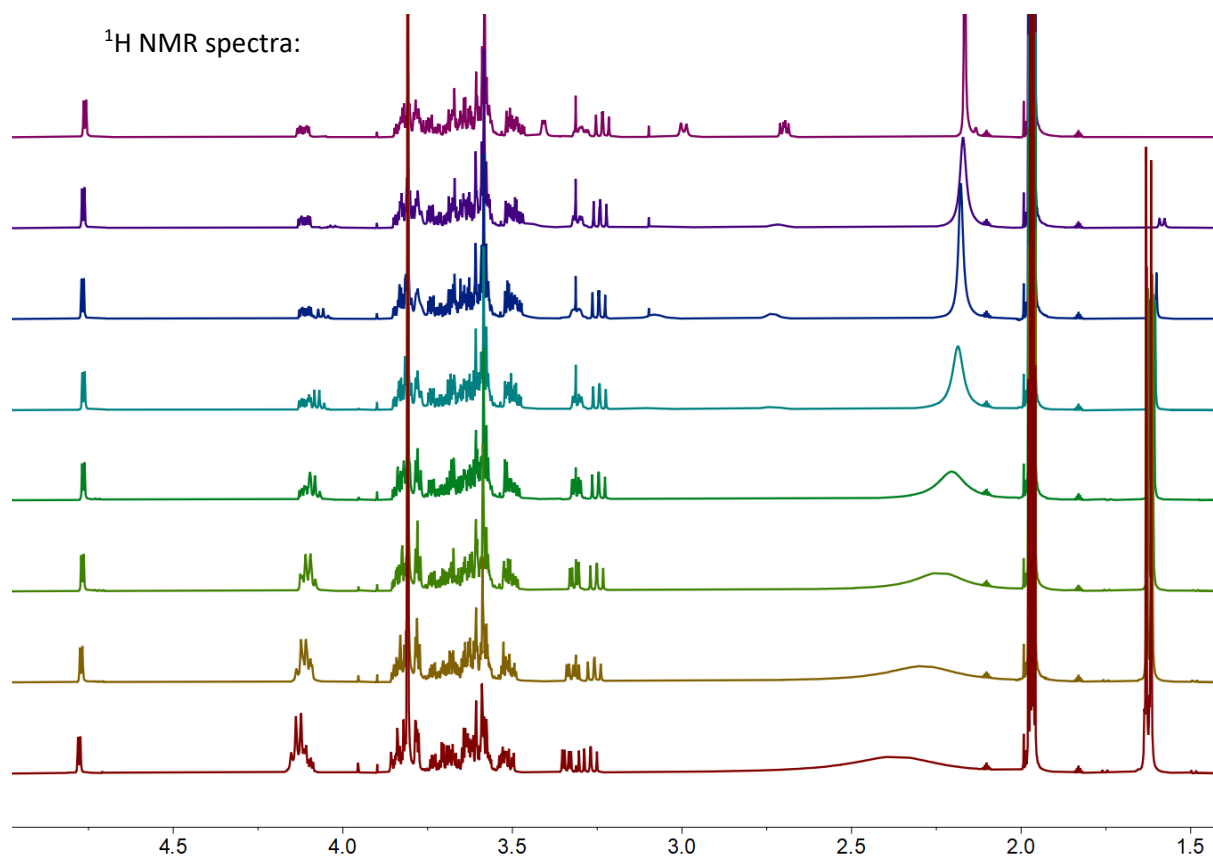

Summary of chemical shift changes:

| Titration | 4.76   | $\Delta$ ppm | 4.12   | $\Delta$ ppm | 3.74   | $\Delta$ ppm | 3.72   | $\Delta$ ppm |
|-----------|--------|--------------|--------|--------------|--------|--------------|--------|--------------|
| 0         | 4.7607 | 0.0000       | 4.1004 | 0.0000       | 3.7448 | 0.0000       | 3.7224 | 0.0000       |
| 1         | 4.7654 | 0.0047       | 4.0961 | 0.0043       | 3.7418 | 0.0030       | 3.7194 | 0.0030       |
| 2         | 4.7668 | 0.0061       | 4.0938 | 0.0066       | 3.7403 | 0.0045       | 3.7171 | 0.0053       |
| 3         | 4.7645 | 0.0038       | 4.0941 | 0.0063       | 3.74   | 0.0048       | 3.7168 | 0.0056       |
| 4         | 4.7653 | 0.0046       | 4.0934 | 0.0070       | 3.7389 | 0.0059       | 3.7157 | 0.0067       |
| 5         | 4.7681 | 0.0074       | 4.0921 | 0.0083       | 3.7369 | 0.0079       | 3.7143 | 0.0081       |
| 6         | 4.7714 | 0.0107       | 4.09   | 0.0104       | 3.7359 | 0.0089       | 3.7128 | 0.0096       |
| 7         | 4.777  | 0.0163       | 4.0877 | 0.0127       | 3.7343 | 0.0105       | 3.7115 | 0.0109       |

Plot of chemical shift change vs guest concentration:

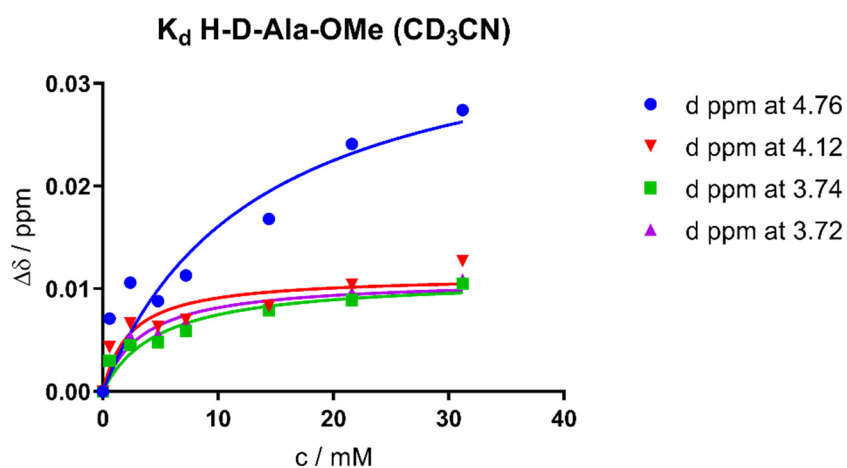

$K_d$  values obtained by fitting the data for selected protons into the single-site specific binding model:

|                  |        |        |        |       |
|------------------|--------|--------|--------|-------|
| <b>Kd</b>        | 11.65  | 4.09   | 7.52   | 5.6   |
| <b>R squared</b> | 0.8853 | 0.8553 | 0.9321 | 0.945 |

$$K_d = 7.20 \pm 2.83 \text{ mM} \rightarrow K_a = 139 \pm 55 \text{ M}^{-1}$$

### H-L-Phe-OMe x HCl to receptor 1:

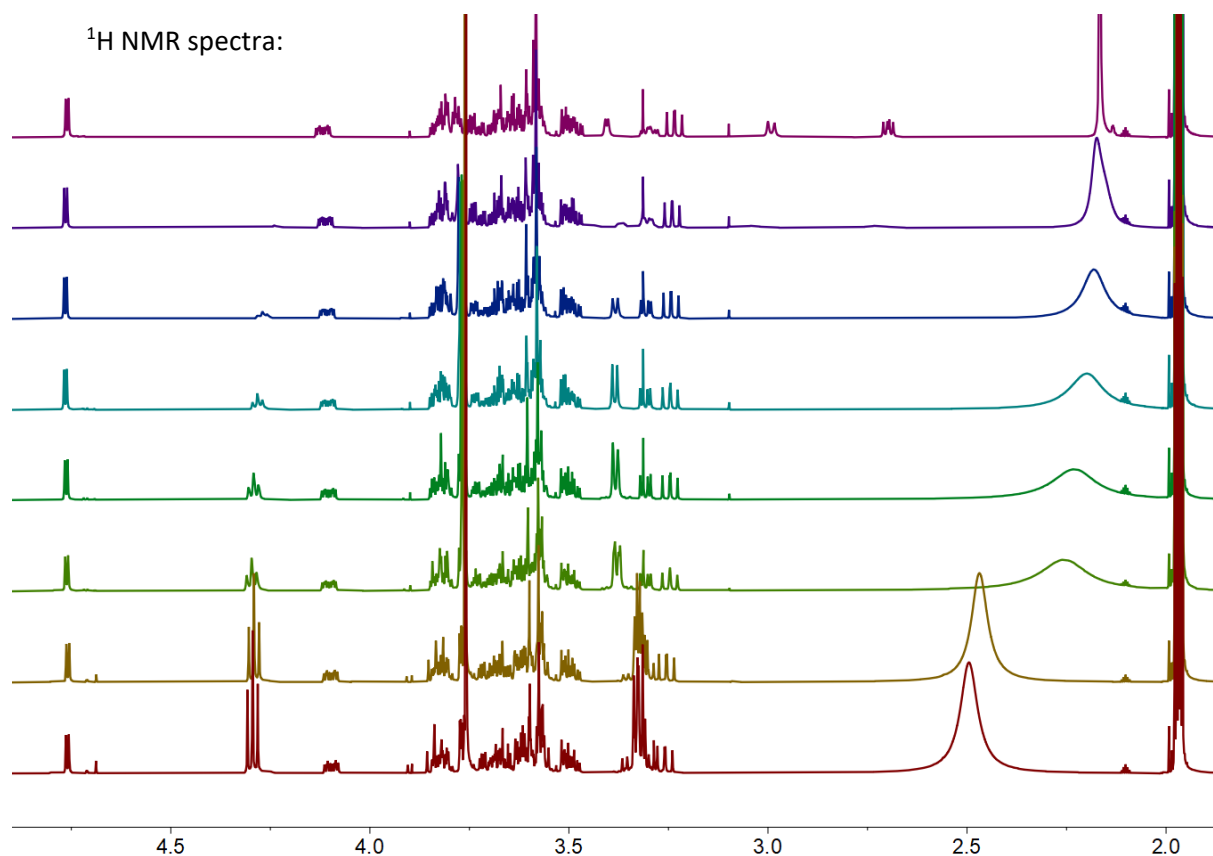

Summary of chemical shift changes:

| Titration | 4.12   | $\Delta\text{ppm}$ | 3.72   | $\Delta\text{ppm}$ | 3.47   | $\Delta\text{ppm}$ | 3.29   | $\Delta\text{ppm}$ |
|-----------|--------|--------------------|--------|--------------------|--------|--------------------|--------|--------------------|
| 0         | 4.118  | 0.0000             | 3.7217 | 0.0000             | 3.4924 | 0.0000             | 3.2983 | 0.0000             |
| 1         | 4.1117 | 0.0063             | 3.7183 | 0.0034             | 3.4951 | 0.0027             | 3.3038 | 0.0055             |
| 2         | 4.1074 | 0.0106             | 3.7156 | 0.0061             | 3.497  | 0.0046             | 3.3072 | 0.0089             |
| 3         | 4.1055 | 0.0125             | 3.713  | 0.0087             | 3.4977 | 0.0053             | 3.3077 | 0.0094             |
| 4         | 4.1037 | 0.0143             | 3.7105 | 0.0112             | 3.4985 | 0.0061             | 3.3081 | 0.0098             |
| 5         | 4.1023 | 0.0157             | 3.7083 | 0.0134             | 3.4986 | 0.0062             | 3.3079 | 0.0096             |
| 6         | 4.1001 | 0.0179             | 3.7072 | 0.0145             | 3.499  | 0.0066             | 3.3087 | 0.0104             |
| 7         | 4.0983 | 0.0197             | 3.7065 | 0.0152             | 3.4994 | 0.0070             | 3.3089 | 0.0106             |

Plot of chemical shift change vs guest concentration:

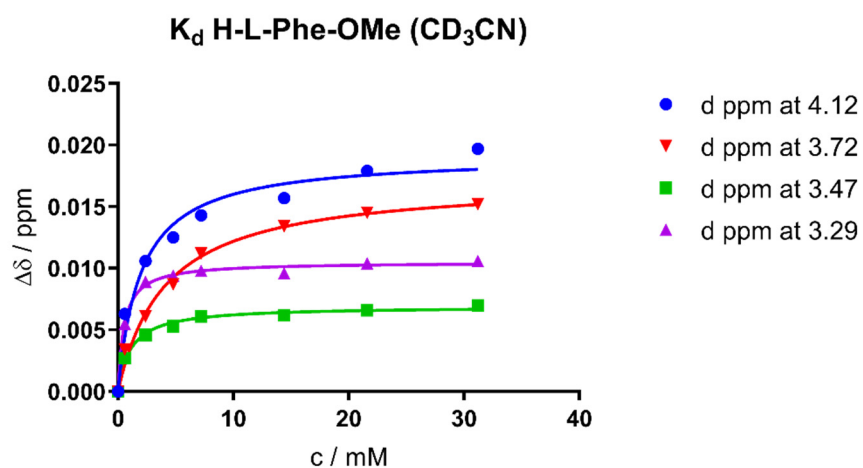



$K_d$  values obtained by fitting the data for selected protons into the single-site specific binding model:

|                  |        |        |        |        |
|------------------|--------|--------|--------|--------|
| <b>Kd</b>        | 2.32   | 3.78   | 1.31   | 2.01   |
| <b>R squared</b> | 0.9712 | 0.9931 | 0.9929 | 0.9949 |

$$K_d = 2.36 \pm 0.90 \text{ mM} \rightarrow K_a = 424 \pm 161 \text{ M}^{-1}$$

# H-D-Phe-OMe x HCl to receptor 1:

<sup>1</sup>H NMR spectra:

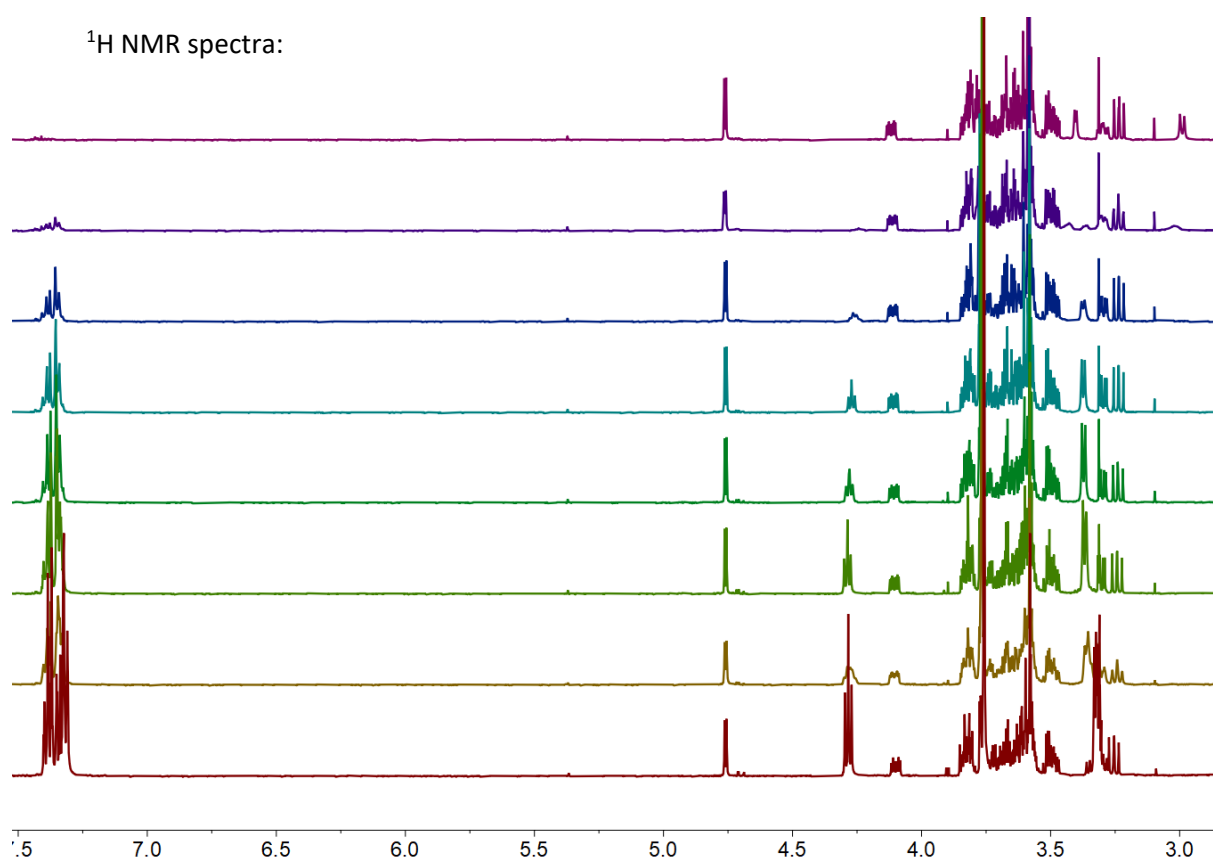

Summary of chemical shift changes:

| Titration | 4.12   | $\Delta$ ppm | 3.72   | $\Delta$ ppm | 3.47   | $\Delta$ ppm | 3.29   | $\Delta$ ppm |
|-----------|--------|--------------|--------|--------------|--------|--------------|--------|--------------|
| 0         | 4.1181 | 0.0000       | 3.7222 | 0.0000       | 3.4756 | 0.0000       | 3.2924 | 0.0000       |
| 1         | 4.1137 | 0.0044       | 3.7203 | 0.0019       | 3.4762 | 0.0006       | 3.2950 | 0.0026       |
| 2         | 4.1116 | 0.0065       | 3.7186 | 0.0036       | 3.4769 | 0.0013       | 3.2953 | 0.0029       |
| 3         | 4.1095 | 0.0086       | 3.7159 | 0.0063       | 3.4771 | 0.0015       | 3.2966 | 0.0042       |
| 4         | 4.1076 | 0.0105       | 3.7136 | 0.0086       | 3.4772 | 0.0016       | 3.2989 | 0.0065       |
| 5         | 4.1056 | 0.0125       | 3.7107 | 0.0115       | 3.4776 | 0.0020       | 3.2992 | 0.0068       |
| 6         | 4.105  | 0.0131       | 3.7101 | 0.0121       | 3.4778 | 0.0022       | 3.3015 | 0.0091       |
| 7         | 4.1004 | 0.0177       | 3.7093 | 0.0129       | 3.478  | 0.0024       | 3.3028 | 0.0104       |

Plot of chemical shift change vs guest concentration:

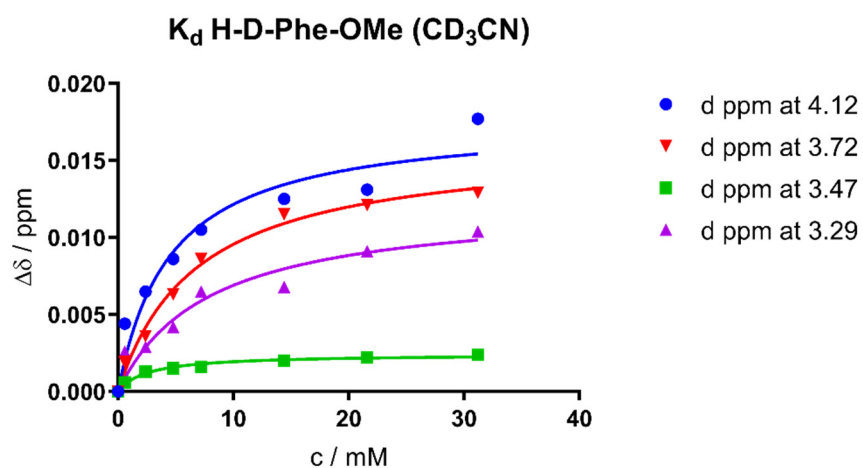

$K_d$  values obtained by fitting the data for selected protons into the single-site specific binding model:

|                  |        |        |        |        |
|------------------|--------|--------|--------|--------|
| <b>Kd</b>        | 5.24   | 7.18   | 7.7    | 8.18   |
| <b>R squared</b> | 0.9363 | 0.9926 | 0.9785 | 0.9439 |

$$K_d = 7.08 \pm 1.1 \text{ mM} \rightarrow K_a = 141 \pm 22 \text{ M}^{-1}$$

# H-L-Pro-OMe x HCl to receptor 1:

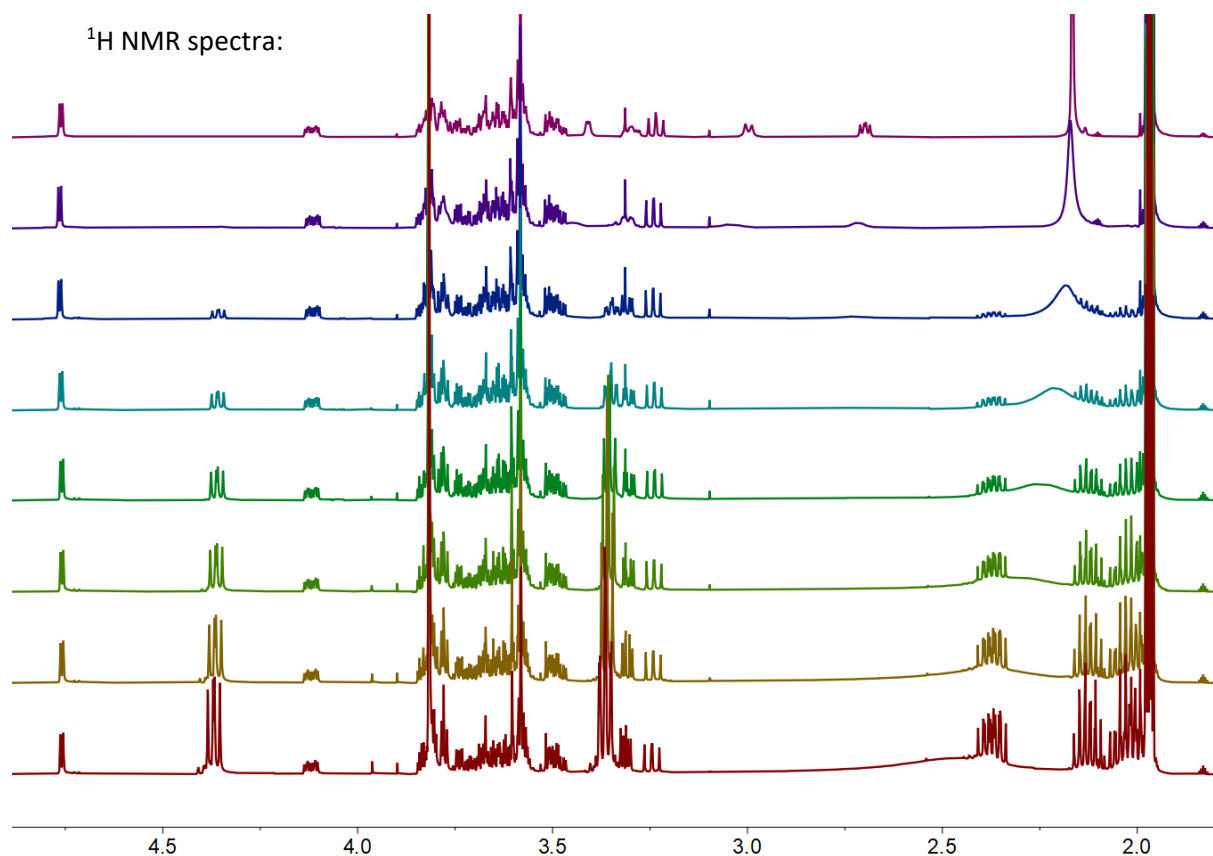

Summary of chemical shift changes:

| Titration | 4.76   | $\Delta$ ppm | 4.12   | $\Delta$ ppm | 3.74   | $\Delta$ ppm | 3.72   | $\Delta$ ppm |
|-----------|--------|--------------|--------|--------------|--------|--------------|--------|--------------|
| 0         | 4.7647 | 0.0000       | 4.1137 | 0.0000       | 3.7453 | 0.0000       | 3.7223 | 0.0000       |
| 1         | 4.764  | 0.0007       | 4.1147 | 0.0010       | 3.7429 | 0.0024       | 3.7195 | 0.0028       |
| 2         | 4.761  | 0.0037       | 4.1148 | 0.0011       | 3.7414 | 0.0039       | 3.7191 | 0.0032       |
| 3         | 4.7594 | 0.0053       | 4.1172 | 0.0035       | 3.7417 | 0.0036       | 3.7194 | 0.0029       |
| 4         | 4.7589 | 0.0058       | 4.1185 | 0.0048       | 3.7412 | 0.0041       | 3.7188 | 0.0035       |
| 5         | 4.7585 | 0.0062       | 4.1192 | 0.0055       | 3.7408 | 0.0045       | 3.7183 | 0.0040       |
| 6         | 4.7582 | 0.0065       | 4.1195 | 0.0058       | 3.74   | 0.0053       | 3.7174 | 0.0049       |
| 7         | 4.7575 | 0.0072       | 4.1203 | 0.0066       | 3.737  | 0.0083       | 3.7158 | 0.0065       |

Plot of chemical shift change vs guest concentration:

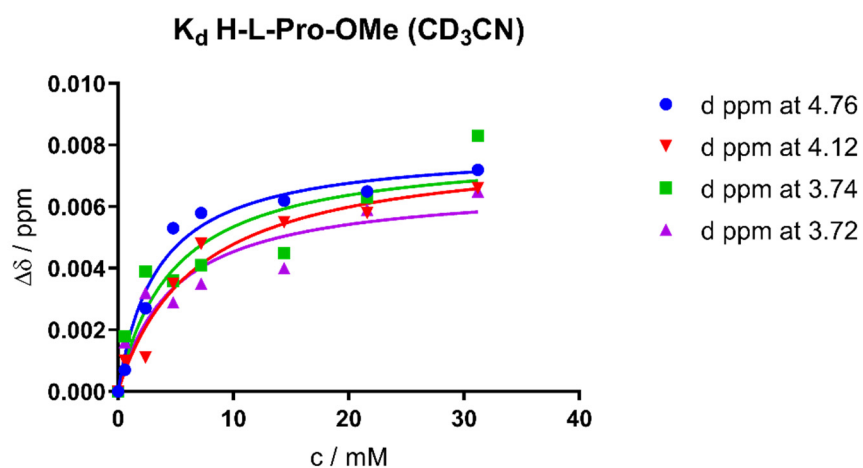

$K_d$  values obtained by fitting the data for selected protons into the single-site specific binding model:

|                  |        |        |        |        |
|------------------|--------|--------|--------|--------|
| <b>Kd</b>        | 7.21   | 7.13   | 9.67   | 4.99   |
| <b>R squared</b> | 0.9685 | 0.9602 | 0.8456 | 0.8831 |

$$K_d = 7.25 \pm 1.7 \text{ mM} \rightarrow K_a = 138 \pm 32 \text{ M}^{-1}$$

# H-D-Pro-OMe x HCl to receptor 1:

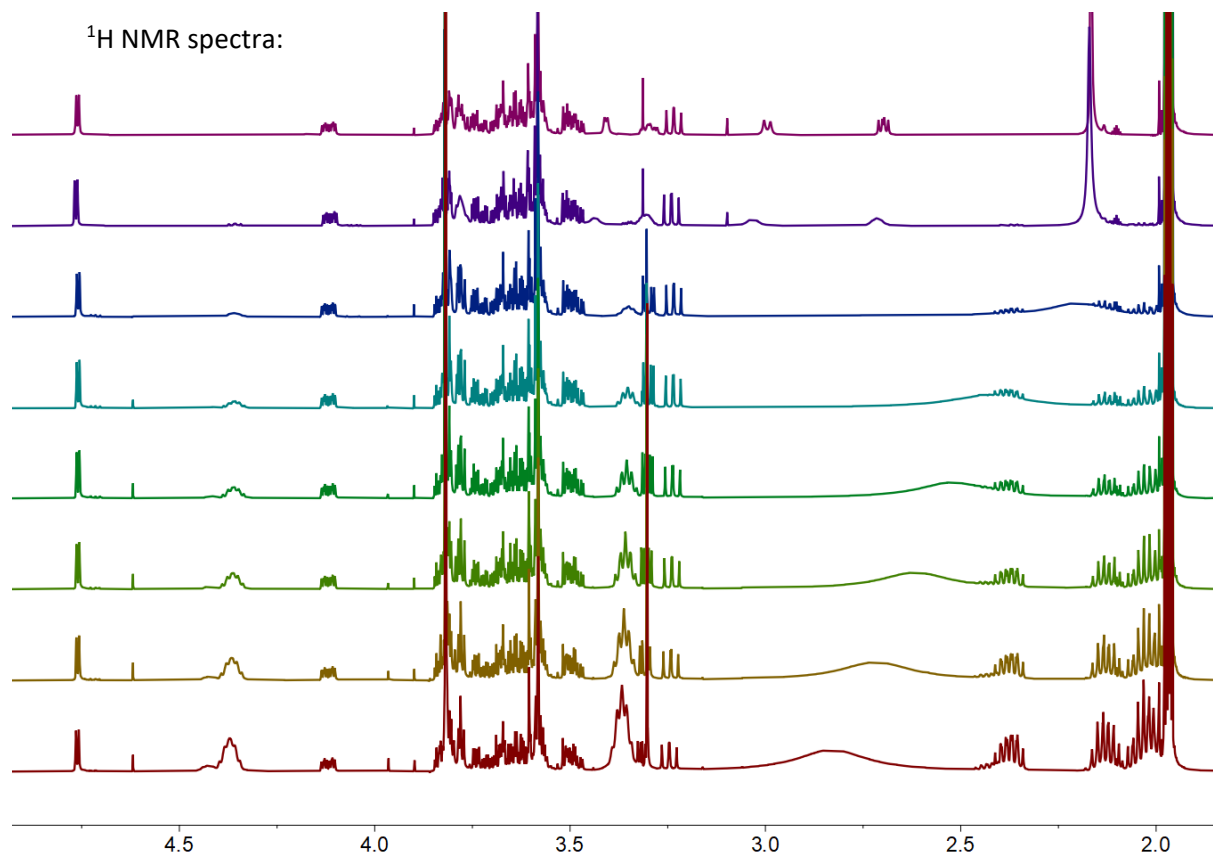

Summary of chemical shift changes:

| Titration | 4.76   | $\Delta$ ppm | 4.12   | $\Delta$ ppm | 3.74   | $\Delta$ ppm | 3.72   | $\Delta$ ppm |
|-----------|--------|--------------|--------|--------------|--------|--------------|--------|--------------|
| 0         | 4.758  | 0.0000       | 4.1174 | 0.0000       | 3.7452 | 0.0000       | 3.7223 | 0.0000       |
| 1         | 4.7584 | 0.0004       | 4.1176 | 0.0002       | 3.7434 | 0.0018       | 3.721  | 0.0013       |
| 2         | 4.7589 | 0.0009       | 4.1182 | 0.0008       | 3.7439 | 0.0013       | 3.7212 | 0.0011       |
| 3         | 4.7592 | 0.0012       | 4.1186 | 0.0012       | 3.7433 | 0.0019       | 3.7207 | 0.0016       |
| 4         | 4.7594 | 0.0014       | 4.1188 | 0.0014       | 3.7429 | 0.0023       | 3.7203 | 0.0020       |
| 5         | 4.7599 | 0.0019       | 4.1189 | 0.0015       | 3.742  | 0.0032       | 3.7193 | 0.0030       |
| 6         | 4.7604 | 0.0024       | 4.1191 | 0.0017       | 3.7411 | 0.0041       | 3.7185 | 0.0038       |
| 7         | 4.7613 | 0.0033       | 4.1195 | 0.0021       | 3.74   | 0.0052       | 3.7172 | 0.0051       |

Plot of chemical shift change vs guest concentration:

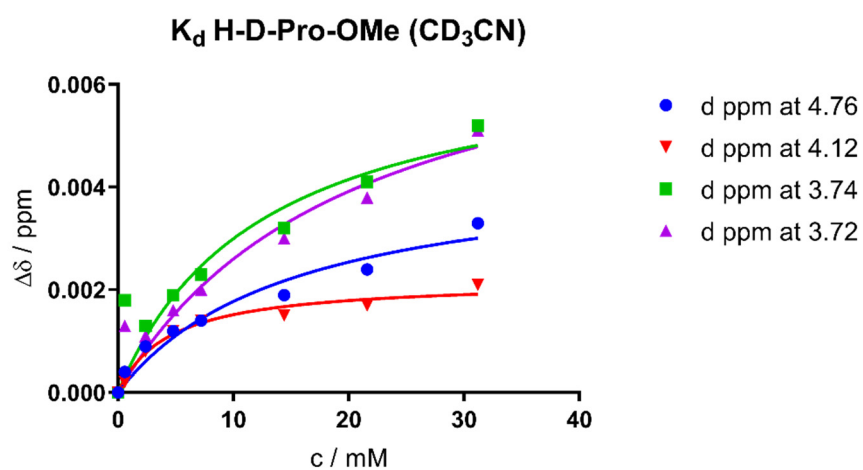

$K_d$  values obtained by fitting the data for selected protons into the single-site specific binding model:

|                  |        |        |        |        |
|------------------|--------|--------|--------|--------|
| <b>Kd</b>        | 15.01  | 6.67   | 12.98  | 20.75  |
| <b>R squared</b> | 0.9529 | 0.9743 | 0.8603 | 0.9208 |

$$K_d = 13.85 \pm 5.0 \text{ mM} \rightarrow K_a = 72 \pm 26 \text{ M}^{-1}$$

# H-L-Thr-OMe x HCl to receptor 1:

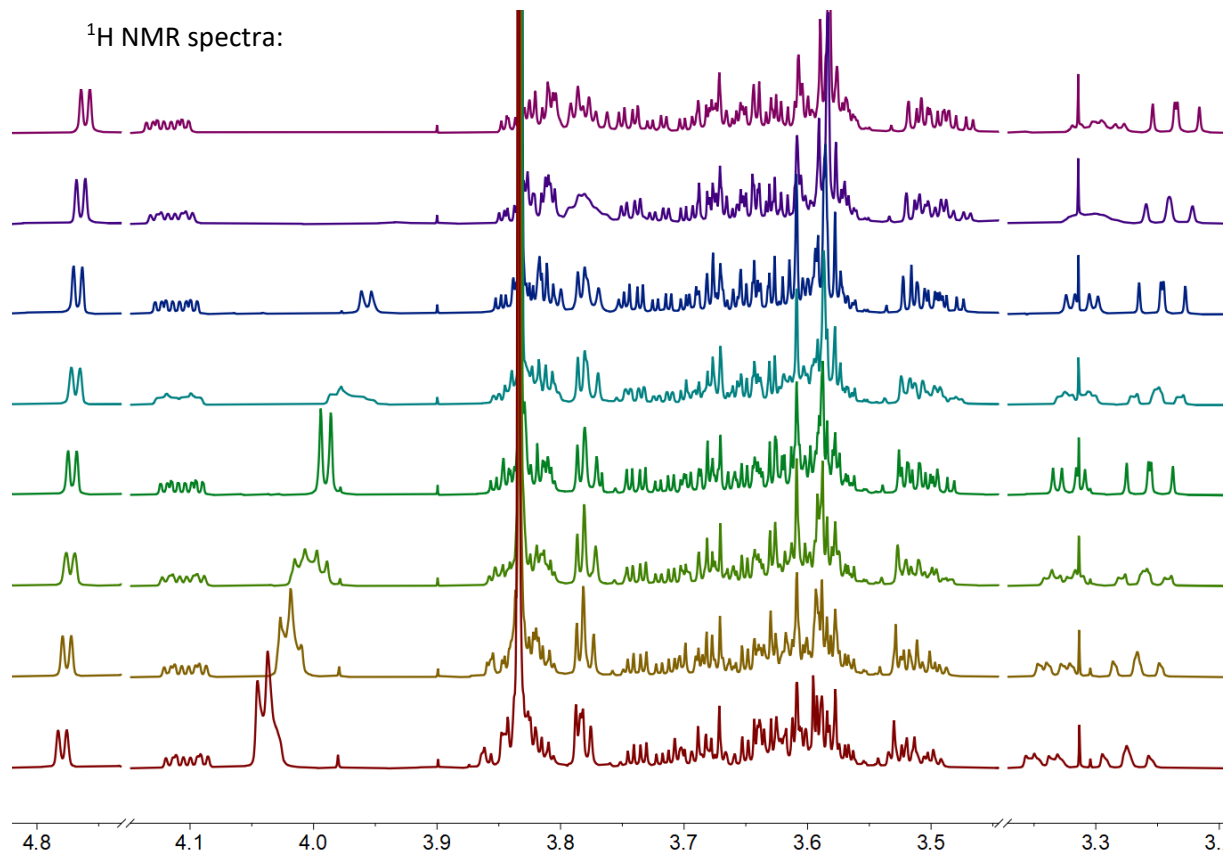

Summary of chemical shift changes:

| Titration | 4.76   | $\Delta$ ppm | 4.12   | $\Delta$ ppm | 3.74   | $\Delta$ ppm | 3.72   | $\Delta$ ppm |
|-----------|--------|--------------|--------|--------------|--------|--------------|--------|--------------|
| 0         | 4.7609 | 0.0000       | 4.1181 | 0.0000       | 3.7447 | 0.0000       | 3.7219 | 0.0000       |
| 1         | 4.7646 | 0.0037       | 4.115  | 0.0031       | 3.7425 | 0.0022       | 3.72   | 0.0019       |
| 2         | 4.7671 | 0.0062       | 4.1111 | 0.0070       | 3.7408 | 0.0039       | 3.7177 | 0.0042       |
| 3         | 4.769  | 0.0081       | 4.1091 | 0.0090       | 3.7398 | 0.0049       | 3.7168 | 0.0051       |
| 4         | 4.7711 | 0.0102       | 4.1065 | 0.0116       | 3.7391 | 0.0056       | 3.7162 | 0.0057       |
| 5         | 4.7732 | 0.0123       | 4.1055 | 0.0126       | 3.7384 | 0.0063       | 3.7155 | 0.0064       |
| 6         | 4.7751 | 0.0142       | 4.1037 | 0.0144       | 3.738  | 0.0067       | 3.715  | 0.0069       |
| 7         | 4.7759 | 0.0150       | 4.103  | 0.0151       | 3.7378 | 0.0069       | 3.7148 | 0.0071       |

Plot of chemical shift change vs guest concentration:

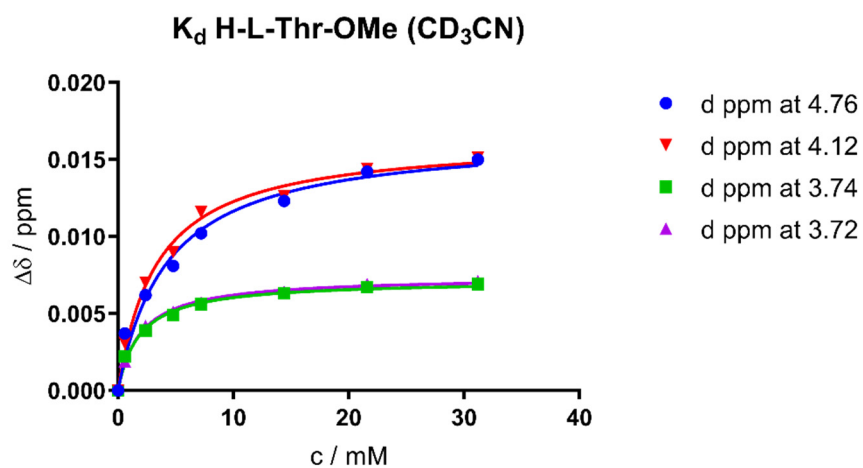



$K_d$  values obtained by fitting the data for selected protons into the single-site specific binding model:

|                  |       |        |        |       |
|------------------|-------|--------|--------|-------|
| <b>Kd</b>        | 4.47  | 3.54   | 3      | 2.07  |
| <b>R squared</b> | 0.983 | 0.9949 | 0.9935 | 0.998 |

$$K_d = 3.27 \pm 0.87 \text{ mM} \rightarrow K_a = 306 \pm 81 \text{ M}^{-1}$$

# H-D-Thr-OMe x HCl to receptor 1:

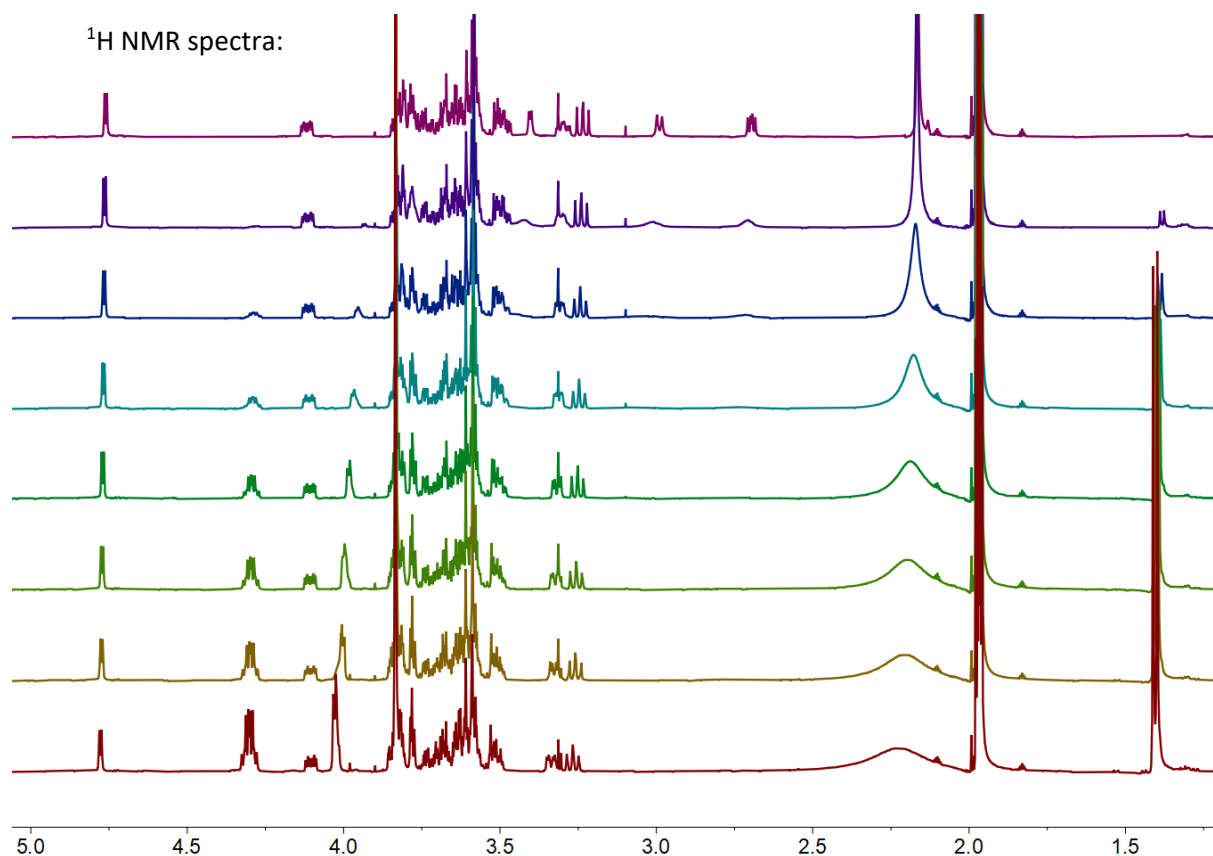

Summary of chemical shift changes:

| Titration | 4.76   | $\Delta$ ppm | 4.12   | $\Delta$ ppm | 3.74   | $\Delta$ ppm | 3.72   | $\Delta$ ppm |
|-----------|--------|--------------|--------|--------------|--------|--------------|--------|--------------|
| 0         | 4.7608 | 0.0000       | 4.118  | 0.0000       | 3.7448 | 0.0000       | 3.7222 | 0.0000       |
| 1         | 4.7646 | 0.0038       | 4.1148 | 0.0032       | 3.7427 | 0.0021       | 3.72   | 0.0022       |
| 2         | 4.7661 | 0.0053       | 4.1127 | 0.0053       | 3.7412 | 0.0036       | 3.7183 | 0.0039       |
| 3         | 4.768  | 0.0072       | 4.1102 | 0.0078       | 3.7399 | 0.0049       | 3.7169 | 0.0053       |
| 4         | 4.7701 | 0.0093       | 4.1083 | 0.0097       | 3.7387 | 0.0061       | 3.7158 | 0.0064       |
| 5         | 4.7723 | 0.0115       | 4.1069 | 0.0111       | 3.7381 | 0.0067       | 3.715  | 0.0072       |
| 6         | 4.774  | 0.0132       | 4.106  | 0.0120       | 3.7374 | 0.0074       | 3.7147 | 0.0075       |
| 7         | 4.7769 | 0.0161       | 4.1043 | 0.0137       | 3.737  | 0.0078       | 3.714  | 0.0082       |

Plot of chemical shift change vs guest concentration:

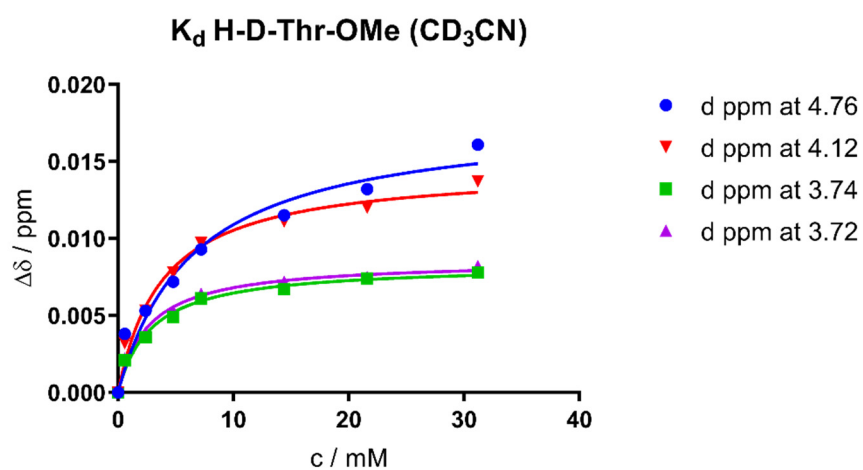

$K_d$  values obtained by fitting the data for selected protons into the single-site specific binding model:

|                  |      |        |        |        |
|------------------|------|--------|--------|--------|
| <b>Kd</b>        | 6.72 | 4.07   | 4.04   | 5.1    |
| <b>R squared</b> | 0.96 | 0.9847 | 0.9893 | 0.9914 |

$$K_d = 4.98 \pm 1.09 \text{ mM} \rightarrow K_a = 201 \pm 44 \text{ M}^{-1}$$

# H-L-Val-OMe x HCl to receptor 1:

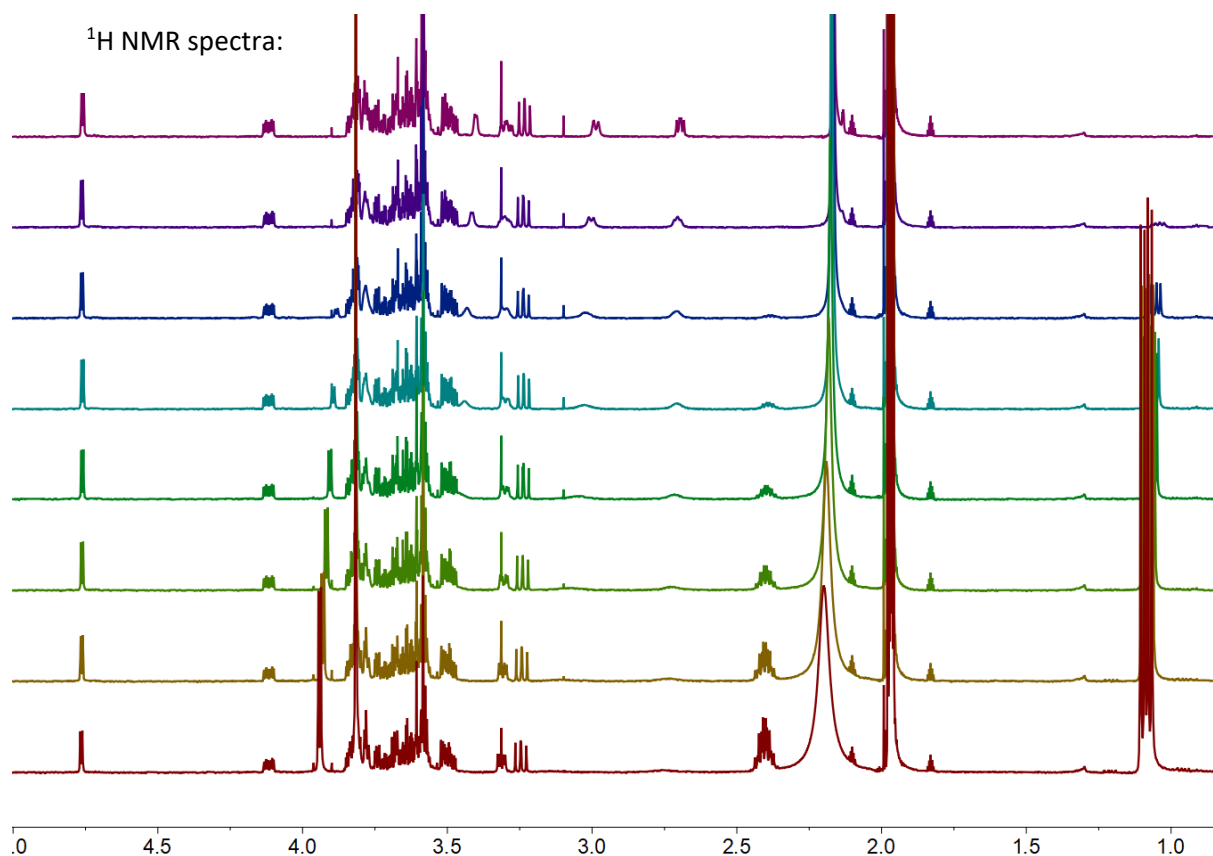

Summary of chemical shift changes:

| Titration | 4.12   | $\Delta$ ppm | 3.74   | $\Delta$ ppm | 3.72   | $\Delta$ ppm | 3.48   | $\Delta$ ppm |
|-----------|--------|--------------|--------|--------------|--------|--------------|--------|--------------|
| 0         | 4.1181 | 0.0000       | 3.7455 | 0.0000       | 3.7222 | 0.0000       | 3.4867 | 0.0000       |
| 1         | 4.116  | 0.0021       | 3.7441 | 0.0014       | 3.7211 | 0.0011       | 3.4882 | 0.0015       |
| 2         | 4.1159 | 0.0022       | 3.7438 | 0.0017       | 3.721  | 0.0012       | 3.4888 | 0.0021       |
| 3         | 4.1143 | 0.0038       | 3.7437 | 0.0018       | 3.7208 | 0.0014       | 3.4892 | 0.0025       |
| 4         | 4.1141 | 0.0040       | 3.7432 | 0.0023       | 3.7205 | 0.0017       | 3.4898 | 0.0031       |
| 5         | 4.1136 | 0.0045       | 3.7428 | 0.0027       | 3.72   | 0.0022       | 3.4904 | 0.0037       |
| 6         | 4.1134 | 0.0047       | 3.7424 | 0.0031       | 3.7197 | 0.0025       | 3.4907 | 0.0040       |
| 7         | 4.1132 | 0.0049       | 3.7423 | 0.0032       | 3.7195 | 0.0027       | 3.4909 | 0.0042       |

Plot of chemical shift change vs guest concentration:

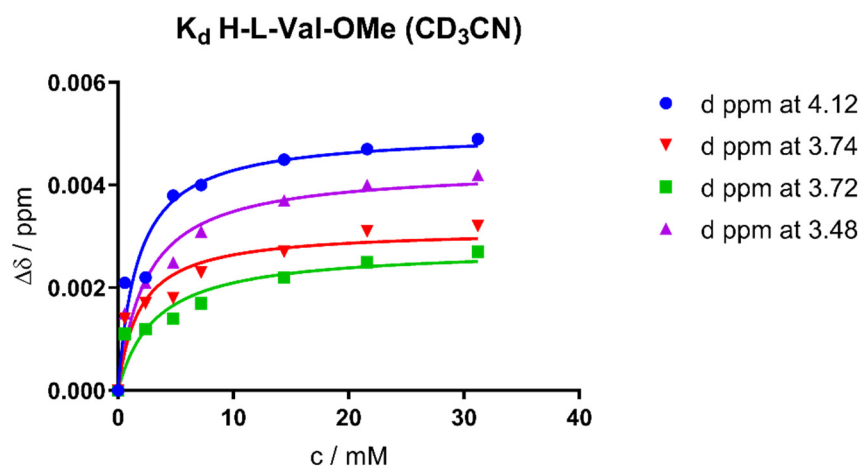

$K_d$  values obtained by fitting the data for selected protons into the single-site specific binding model:

|                  |        |        |        |       |
|------------------|--------|--------|--------|-------|
| <b>Kd</b>        | 1.82   | 2.06   | 3.38   | 2.61  |
| <b>R squared</b> | 0.9385 | 0.9097 | 0.8954 | 0.962 |

$$K_d = 2.47 \pm 0.60 \text{ mM} \rightarrow K_a = 405 \pm 98 \text{ M}^{-1}$$

# H-D-Val-OMe x HCl to receptor 1:

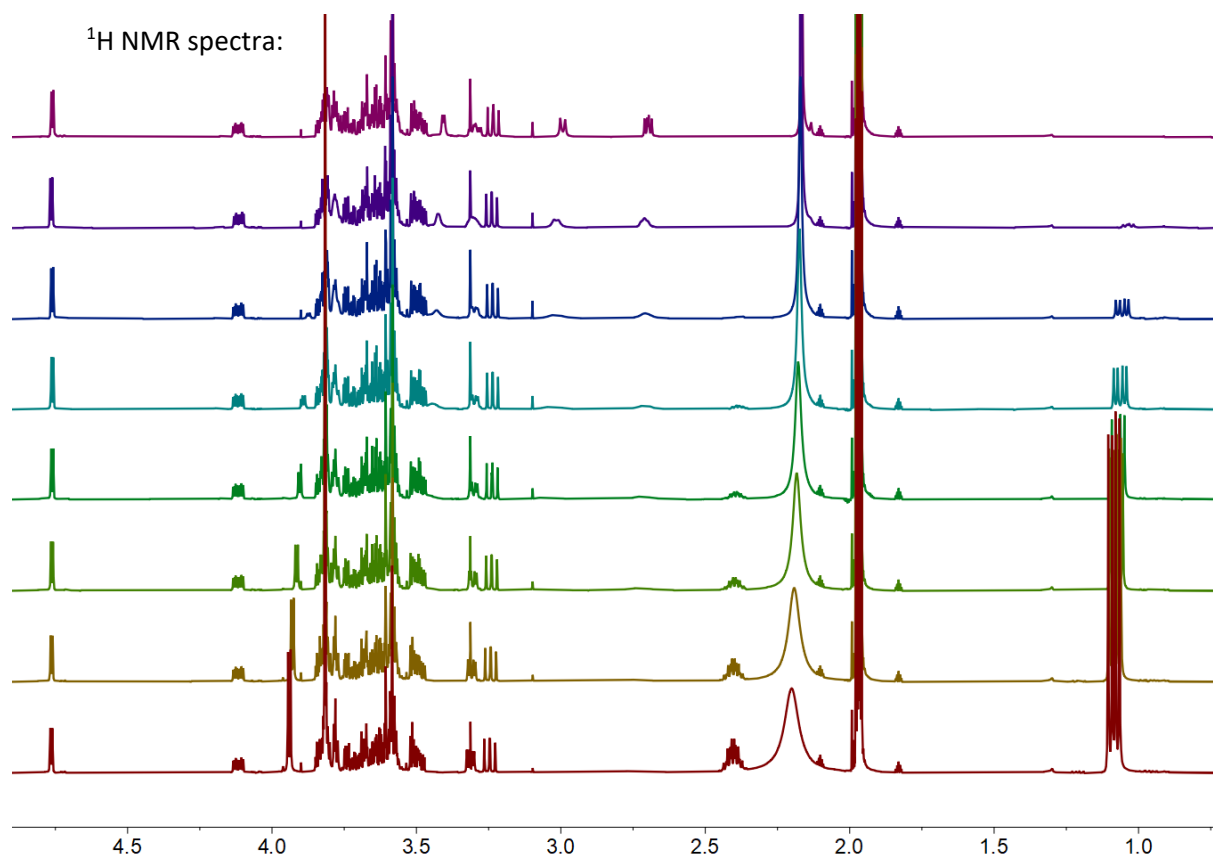

Summary of chemical shift changes:

| Titration | 4.12   | $\Delta$ ppm | 3.74   | $\Delta$ ppm | 3.72   | $\Delta$ ppm | 3.48   | $\Delta$ ppm |
|-----------|--------|--------------|--------|--------------|--------|--------------|--------|--------------|
| 0         | 4.1176 | 0.0000       | 3.7449 | 0.0000       | 3.7224 | 0.0000       | 3.4849 | 0.0000       |
| 1         | 4.1169 | 0.0007       | 3.7442 | 0.0007       | 3.7215 | 0.0009       | 3.4861 | 0.0012       |
| 2         | 4.1171 | 0.0005       | 3.744  | 0.0009       | 3.7212 | 0.0012       | 3.4863 | 0.0014       |
| 3         | 4.117  | 0.0006       | 3.7441 | 0.0008       | 3.7209 | 0.0015       | 3.4867 | 0.0018       |
| 4         | 4.1168 | 0.0008       | 3.7435 | 0.0014       | 3.7203 | 0.0021       | 3.4876 | 0.0027       |
| 5         | 4.1166 | 0.0010       | 3.743  | 0.0019       | 3.7198 | 0.0026       | 3.4882 | 0.0033       |
| 6         | 4.1165 | 0.0011       | 3.7423 | 0.0026       | 3.7195 | 0.0029       | 3.4888 | 0.0039       |
| 7         | 4.1163 | 0.0013       | 3.742  | 0.0029       | 3.7193 | 0.0031       | 3.4892 | 0.0043       |

Plot of chemical shift change vs guest concentration:

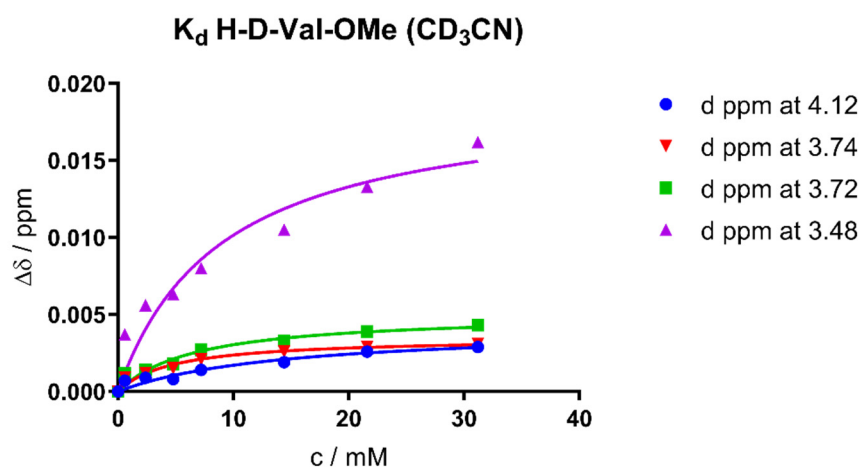

$K_d$  values obtained by fitting the data for selected protons into the single-site specific binding model:

|                  |        |        |        |        |
|------------------|--------|--------|--------|--------|
| <b>Kd</b>        | 6.02   | 7.97   | 9.03   | 11.25  |
| <b>R squared</b> | 0.9377 | 0.9653 | 0.9559 | 0.9372 |

$$K_d = 8.57 \pm 1.89 \text{ mM} \rightarrow K_a = 117 \pm 26 \text{ M}^{-1}$$

### 4.3 Titrations in DMSO-d<sub>6</sub>.

H-L-Ala-OMe x HCl to receptor 1:

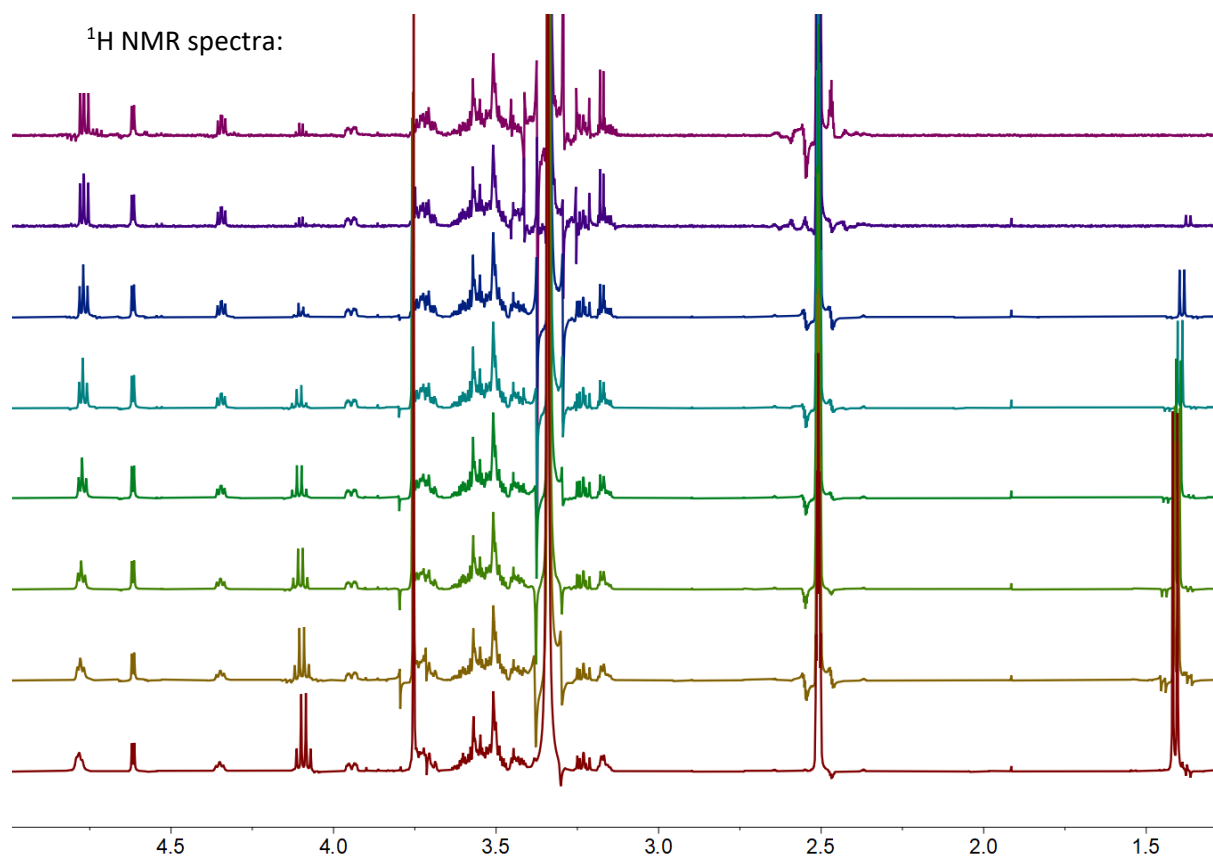

Summary of chemical shift changes:

| Titration | 4.76   | $\Delta$ ppm | 4.34   | $\Delta$ ppm | 3.94   | $\Delta$ ppm | 3.71   | $\Delta$ ppm |
|-----------|--------|--------------|--------|--------------|--------|--------------|--------|--------------|
| 0         | 4.7676 | 0.0000       | 4.3444 | 0.0000       | 3.9467 | 0.0000       | 3.7076 | 0.0000       |
| 1         | 4.7684 | 0.0008       | 4.345  | 0.0006       | 3.9463 | 0.0004       | 3.7071 | 0.0005       |
| 2         | 4.7698 | 0.0022       | 4.3456 | 0.0012       | 3.9457 | 0.0010       | 3.7069 | 0.0007       |
| 3         | 4.7715 | 0.0039       | 4.346  | 0.0016       | 3.9456 | 0.0011       | 3.7066 | 0.0010       |
| 4         | 4.7732 | 0.0056       | 4.3465 | 0.0021       | 3.9454 | 0.0013       | 3.7063 | 0.0013       |
| 5         | 4.7757 | 0.0081       | 4.3475 | 0.0031       | 3.945  | 0.0017       | 3.7061 | 0.0015       |
| 6         | 4.7771 | 0.0095       | 4.3485 | 0.0041       | 3.9445 | 0.0022       | 3.7058 | 0.0018       |
| 7         | 4.7779 | 0.0103       | 4.3493 | 0.0049       | 3.9442 | 0.0025       | 3.7053 | 0.0023       |



Plot of chemical shift change vs guest concentration:

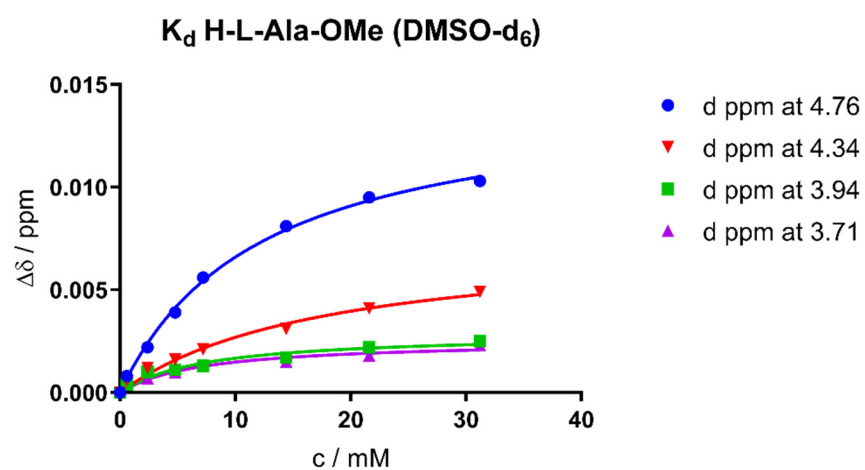

$K_d$  values obtained by fitting the data for selected protons into the single-site specific binding model:

|                  |        |        |      |        |
|------------------|--------|--------|------|--------|
| <b>Kd</b>        | 12.8   | 13.21  | 7.53 | 7.45   |
| <b>R squared</b> | 0.9983 | 0.9848 | 0.96 | 0.9493 |

$$K_d = 10.25 \pm 2.76 \text{ mM} \rightarrow K_a = 98 \pm 26 \text{ M}^{-1}$$

# H-D-Ala-OMe x HCl to receptor 1:

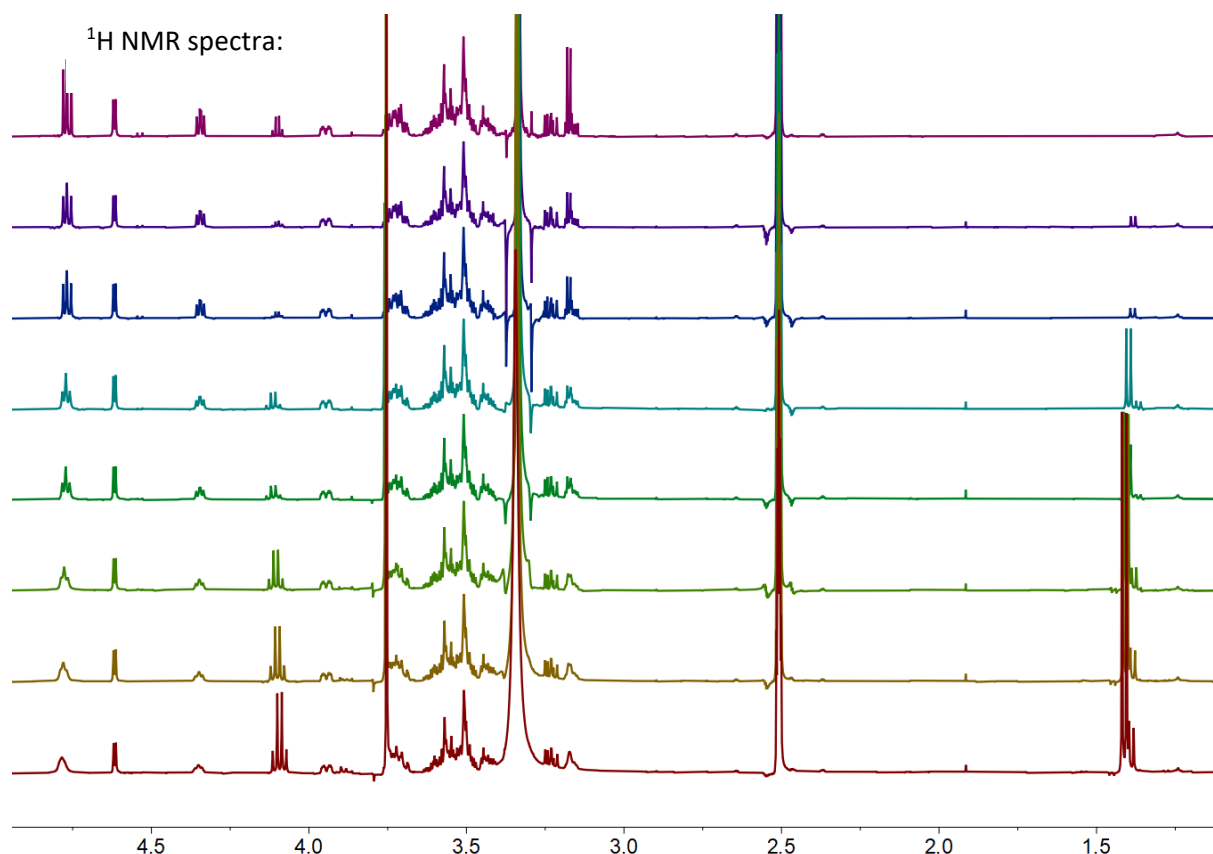

Summary of chemical shift changes:

| Titration | 4.76   | $\Delta$ ppm | 4.34   | $\Delta$ ppm | 3.94   | $\Delta$ ppm | 3.57   | $\Delta$ ppm |
|-----------|--------|--------------|--------|--------------|--------|--------------|--------|--------------|
| 0         | 4.7678 | 0.0000       | 4.3444 | 0.0000       | 3.9467 | 0.0000       | 3.5712 | 0.0000       |
| 1         | 4.7685 | 0.0007       | 4.3448 | 0.0004       | 3.9464 | 0.0003       | 3.5710 | 0.0002       |
| 2         | 4.7702 | 0.0024       | 4.3453 | 0.0009       | 3.946  | 0.0007       | 3.5707 | 0.0005       |
| 3         | 4.7725 | 0.0047       | 4.3458 | 0.0014       | 3.9458 | 0.0009       | 3.5705 | 0.0007       |
| 4         | 4.7733 | 0.0055       | 4.347  | 0.0026       | 3.9455 | 0.0012       | 3.5703 | 0.0009       |
| 5         | 4.7763 | 0.0085       | 4.3478 | 0.0034       | 3.945  | 0.0017       | 3.5701 | 0.0011       |
| 6         | 4.7792 | 0.0114       | 4.3486 | 0.0042       | 3.9446 | 0.0021       | 3.5697 | 0.0015       |
| 7         | 4.7805 | 0.0127       | 4.3501 | 0.0057       | 3.9442 | 0.0025       | 3.5692 | 0.0020       |

Plot of chemical shift change vs guest concentration:

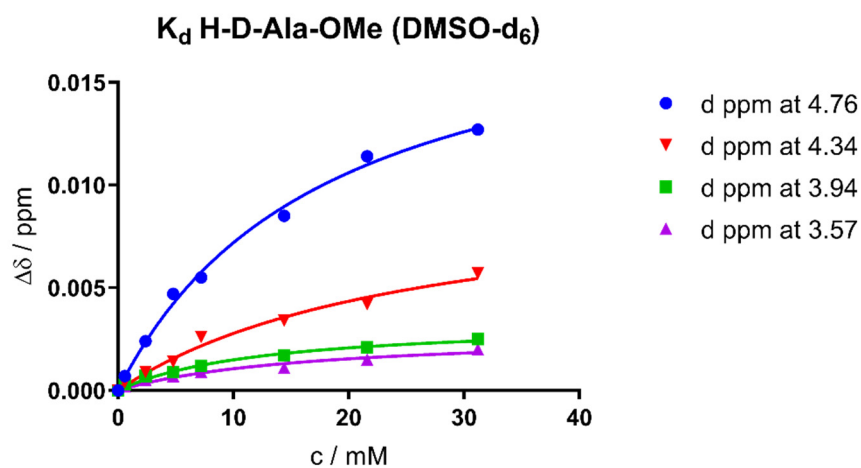

$K_d$  values obtained by fitting the data for selected protons into the single-site specific binding model:

|                  |        |        |        |        |
|------------------|--------|--------|--------|--------|
| <b>Kd</b>        | 19.17  | 27.76  | 13.33  | 17.64  |
| <b>R squared</b> | 0.9925 | 0.9874 | 0.9878 | 0.9617 |

$$K_d = 19.48 \pm 5.24 \text{ mM} \rightarrow K_a = 51 \pm 14 \text{ M}^{-1}$$

# H-L-Phe-OMe x HCl to receptor 1:

<sup>1</sup>H NMR spectra:

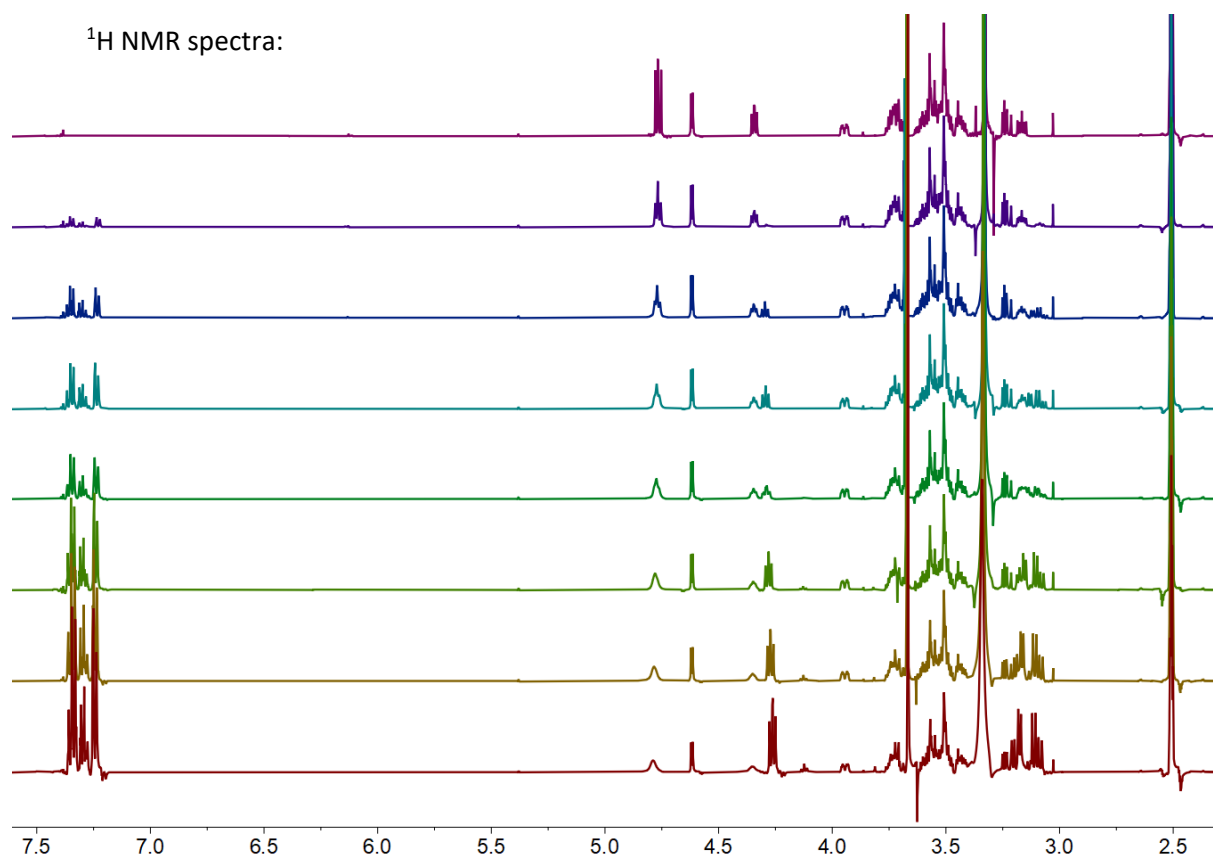

Summary of chemical shift changes:

| Titration | 4.34   | $\Delta$ ppm | 3.94   | $\Delta$ ppm | 3.71   | $\Delta$ ppm | 3.57   | $\Delta$ ppm |
|-----------|--------|--------------|--------|--------------|--------|--------------|--------|--------------|
| 0         | 4.3428 | 0.0000       | 3.9467 | 0.0000       | 3.7076 | 0.0000       | 3.5714 | 0.0000       |
| 1         | 4.3438 | 0.0010       | 3.9461 | 0.0006       | 3.707  | 0.0006       | 3.5710 | 0.0004       |
| 2         | 4.3453 | 0.0025       | 3.9455 | 0.0012       | 3.7066 | 0.0010       | 3.5707 | 0.0007       |
| 3         | 4.3457 | 0.0029       | 3.9454 | 0.0013       | 3.7065 | 0.0011       | 3.5706 | 0.0008       |
| 4         | 4.3462 | 0.0034       | 3.9452 | 0.0015       | 3.7063 | 0.0013       | 3.5705 | 0.0009       |
| 5         | 4.3471 | 0.0043       | 3.9449 | 0.0018       | 3.7059 | 0.0017       | 3.5700 | 0.0014       |
| 6         | 4.3485 | 0.0057       | 3.9446 | 0.0021       | 3.7055 | 0.0021       | 3.5699 | 0.0015       |
| 7         | 4.3489 | 0.0061       | 3.9442 | 0.0025       | 3.7052 | 0.0024       | 3.5695 | 0.0019       |

Plot of chemical shift change vs guest concentration:

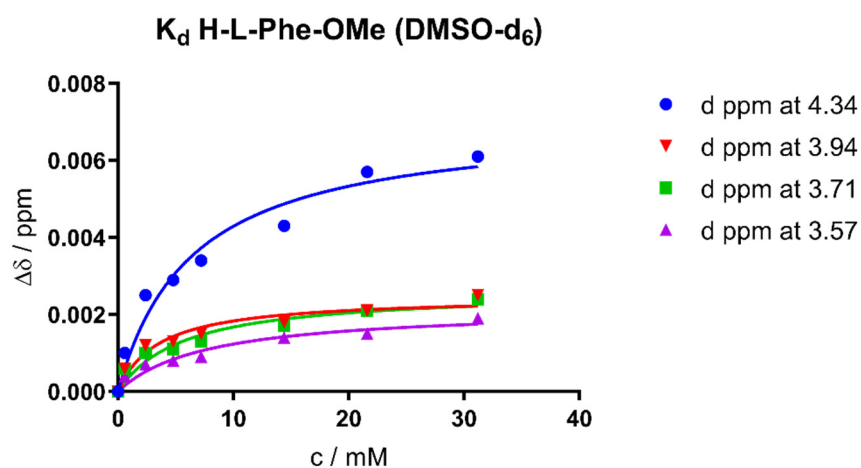

$K_d$  values obtained by fitting the data for selected protons into the single-site specific binding model:

|                  |        |        |        |        |
|------------------|--------|--------|--------|--------|
| <b>Kd</b>        | 6.63   | 3.66   | 5.83   | 7.91   |
| <b>R squared</b> | 0.9666 | 0.9483 | 0.9396 | 0.9448 |

$$K_d = 6.00 \pm 1.54 \text{ mM} \rightarrow K_a = 167 \pm 43 \text{ M}^{-1}$$

# H-D-Phe-OMe x HCl to receptor 1:

<sup>1</sup>H NMR spectra:

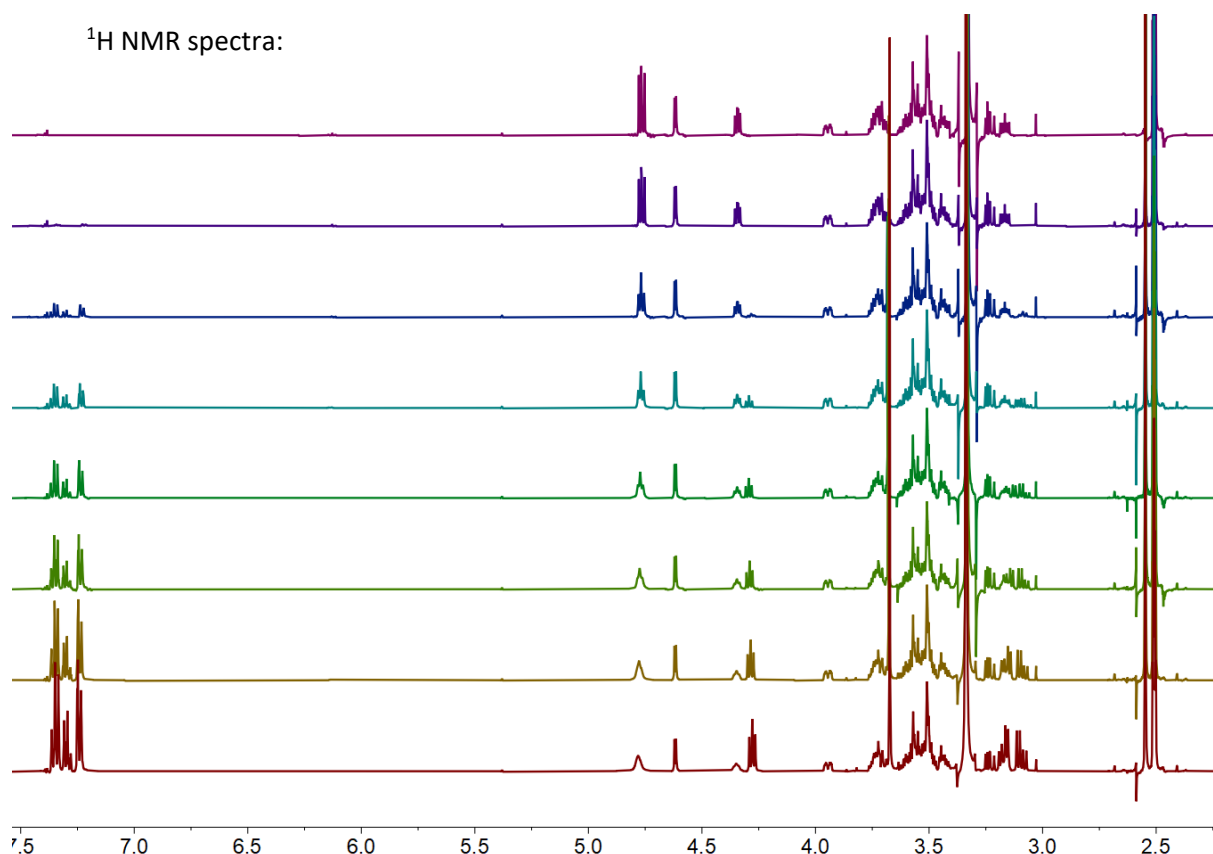

Summary of chemical shift changes:

| Titration | 4.34   | $\Delta$ ppm | 3.94   | $\Delta$ ppm | 3.71   | $\Delta$ ppm | 3.57   | $\Delta$ ppm |
|-----------|--------|--------------|--------|--------------|--------|--------------|--------|--------------|
| 0         | 4.3429 | 0.0000       | 3.9464 | 0.0000       | 3.7078 | 0.0000       | 3.5713 | 0.0000       |
| 1         | 4.3434 | 0.0005       | 3.9461 | 0.0003       | 3.7075 | 0.0003       | 3.5711 | 0.0002       |
| 2         | 4.344  | 0.0011       | 3.9459 | 0.0005       | 3.7072 | 0.0006       | 3.5709 | 0.0004       |
| 3         | 4.3447 | 0.0018       | 3.9458 | 0.0006       | 3.7069 | 0.0009       | 3.5708 | 0.0005       |
| 4         | 4.3455 | 0.0026       | 3.9454 | 0.0010       | 3.7067 | 0.0011       | 3.5706 | 0.0007       |
| 5         | 4.3463 | 0.0034       | 3.9453 | 0.0011       | 3.7063 | 0.0015       | 3.5703 | 0.0010       |
| 6         | 4.3471 | 0.0042       | 3.945  | 0.0014       | 3.706  | 0.0018       | 3.5700 | 0.0013       |
| 7         | 4.3487 | 0.0058       | 3.9447 | 0.0017       | 3.7056 | 0.0022       | 3.5696 | 0.0017       |

Plot of chemical shift change vs guest concentration:

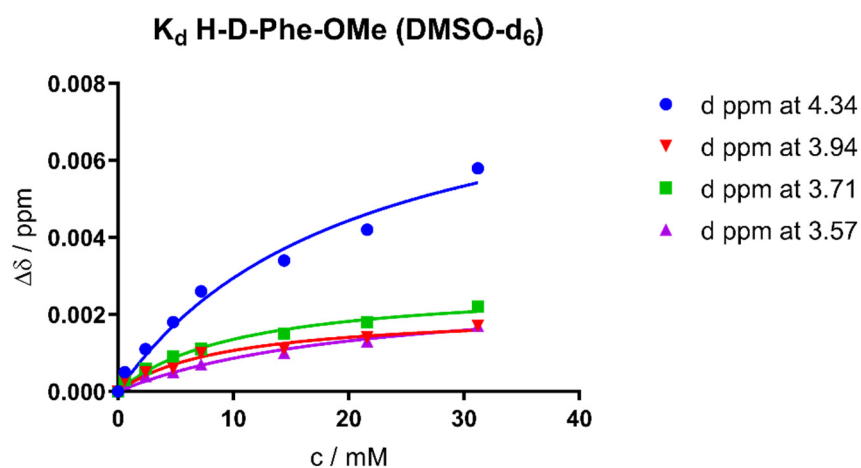

$K_d$  values obtained by fitting the data for selected protons into the single-site specific binding model:

|                      |        |        |        |       |
|----------------------|--------|--------|--------|-------|
| <b>K<sub>d</sub></b> | 21.86  | 13.87  | 15.01  | 23.24 |
| <b>R squared</b>     | 0.9795 | 0.9651 | 0.9833 | 0.978 |

$$K_d = 18.50 \pm 4.10 \text{ mM} \rightarrow K_a = 54 \pm 12 \text{ M}^{-1}$$

### H-L-Pro-OMe x HCl to receptor 1:

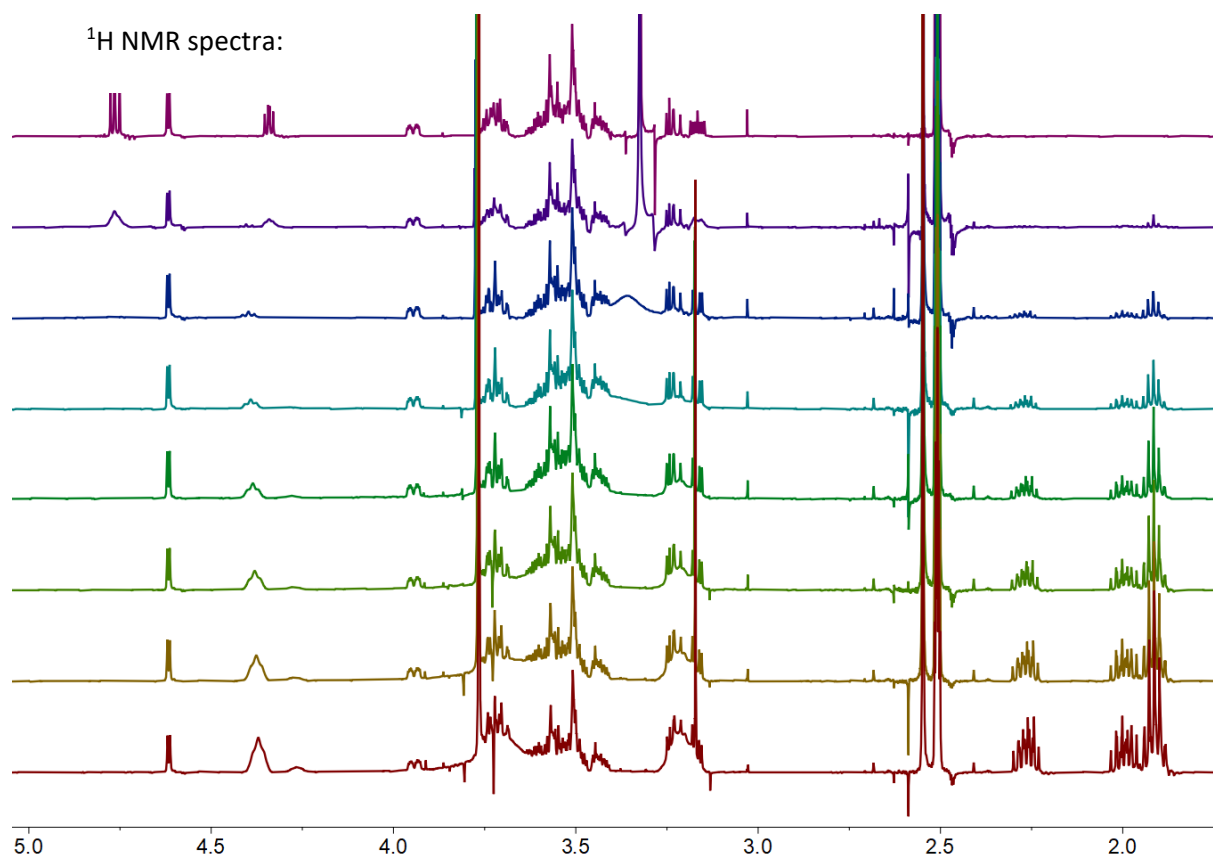

Summary of chemical shift changes:

| Titration | 4.62   | $\Delta\text{ppm}$ | 3.94   | $\Delta\text{ppm}$ | 3.71   | $\Delta\text{ppm}$ | 3.69   | $\Delta\text{ppm}$ |
|-----------|--------|--------------------|--------|--------------------|--------|--------------------|--------|--------------------|
| 0         | 4.6177 | 0.0000             | 3.9463 | 0.0000             | 3.711  | 0.0000             | 3.6885 | 0.0000             |
| 1         | 4.6174 | 0.0003             | 3.9459 | 0.0004             | 3.7105 | 0.0005             | 3.6881 | 0.0004             |
| 2         | 4.6172 | 0.0005             | 3.9455 | 0.0008             | 3.7099 | 0.0011             | 3.6879 | 0.0006             |
| 3         | 4.6171 | 0.0006             | 3.945  | 0.0013             | 3.7095 | 0.0015             | 3.6876 | 0.0009             |
| 4         | 4.6169 | 0.0008             | 3.9447 | 0.0016             | 3.7088 | 0.0022             | 3.6874 | 0.0011             |
| 5         | 4.6167 | 0.0010             | 3.9444 | 0.0019             | 3.7083 | 0.0027             | 3.6866 | 0.0019             |
| 6         | 4.6164 | 0.0013             | 3.9435 | 0.0028             | 3.7077 | 0.0033             | 3.6862 | 0.0023             |
| 7         | 4.6162 | 0.0015             | 3.9433 | 0.0030             | 3.707  | 0.0040             | 3.686  | 0.0025             |

Plot of chemical shift change vs guest concentration:

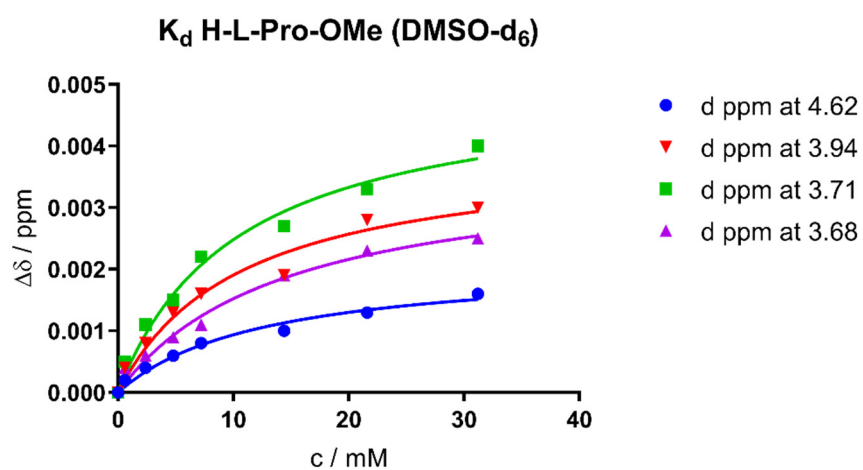



$K_d$  values obtained by fitting the data for selected protons into the single-site specific binding model:

|                  |        |        |        |        |
|------------------|--------|--------|--------|--------|
| <b>Kd</b>        | 11.19  | 10.91  | 15.17  | 17.93  |
| <b>R squared</b> | 0.9798 | 0.9719 | 0.9867 | 0.9827 |

$$K_d = 13.80 \pm 2.92 \text{ mM} \rightarrow K_a = 72 \pm 15 \text{ M}^{-1}$$

# H-D-Pro-OMe x HCl to receptor 1:

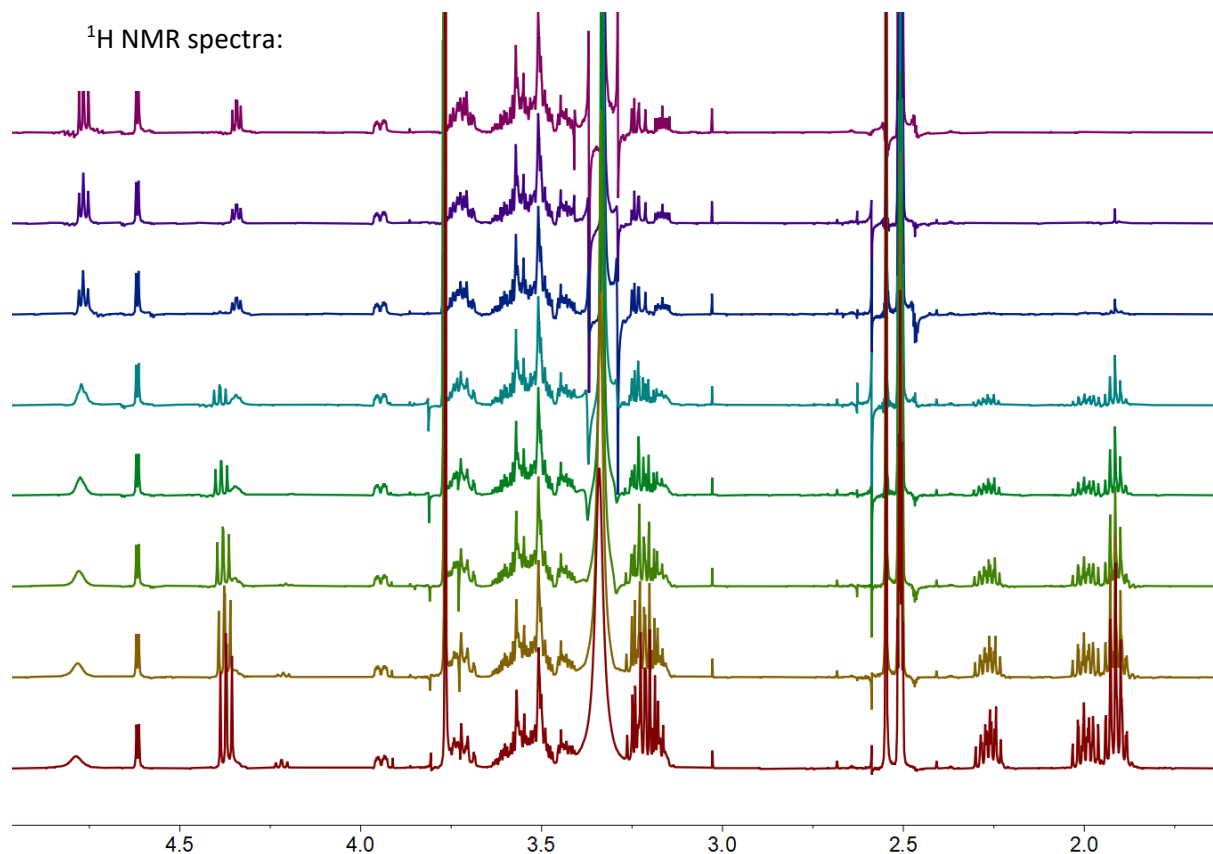

Summary of chemical shift changes:

| Titration | 4.76   | $\Delta$ ppm | 3.94   | $\Delta$ ppm | 3.68   | $\Delta$ ppm | 3.5    | $\Delta$ ppm |
|-----------|--------|--------------|--------|--------------|--------|--------------|--------|--------------|
| 0         | 4.7663 | 0.0000       | 3.9463 | 0.0000       | 3.688  | 0.0000       | 3.5045 | 0.0000       |
| 1         | 4.7668 | 0.0005       | 3.9461 | 0.0002       | 3.6878 | 0.0002       | 3.5043 | 0.0002       |
| 2         | 4.7672 | 0.0009       | 3.9457 | 0.0006       | 3.6876 | 0.0004       | 3.5042 | 0.0003       |
| 3         | 4.7716 | 0.0053       | 3.9454 | 0.0009       | 3.6875 | 0.0005       | 3.5040 | 0.0005       |
| 4         | 4.7747 | 0.0084       | 3.945  | 0.0013       | 3.6871 | 0.0009       | 3.5039 | 0.0006       |
| 5         | 4.7781 | 0.0118       | 3.9445 | 0.0018       | 3.6867 | 0.0013       | 3.5035 | 0.0010       |
| 6         | 4.7826 | 0.0163       | 3.9438 | 0.0025       | 3.6862 | 0.0018       | 3.5033 | 0.0012       |
| 7         | 4.7846 | 0.0183       | 3.943  | 0.0033       | 3.6857 | 0.0023       | 3.5028 | 0.0017       |

Plot of chemical shift change vs guest concentration:

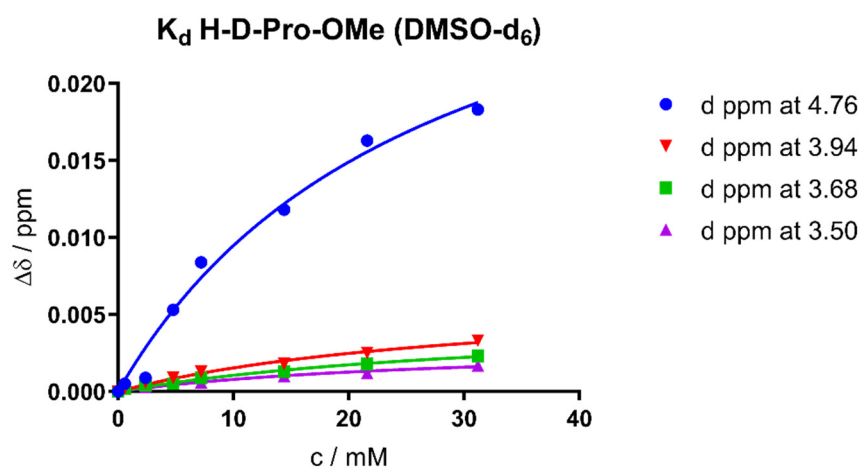

$K_d$  values obtained by fitting the data for selected protons into the single-site specific binding model:

|                  |        |        |        |        |
|------------------|--------|--------|--------|--------|
| <b>Kd</b>        | 29.03  | 34.77  | 29.71  | 32.8   |
| <b>R squared</b> | 0.9833 | 0.9881 | 0.9922 | 0.9759 |

$$K_d = 31.58 \pm 2.33 \text{ mM} \rightarrow K_a = 32 \pm 2 \text{ M}^{-1}$$

# H-L-Thr-OMe x HCl to receptor 1:

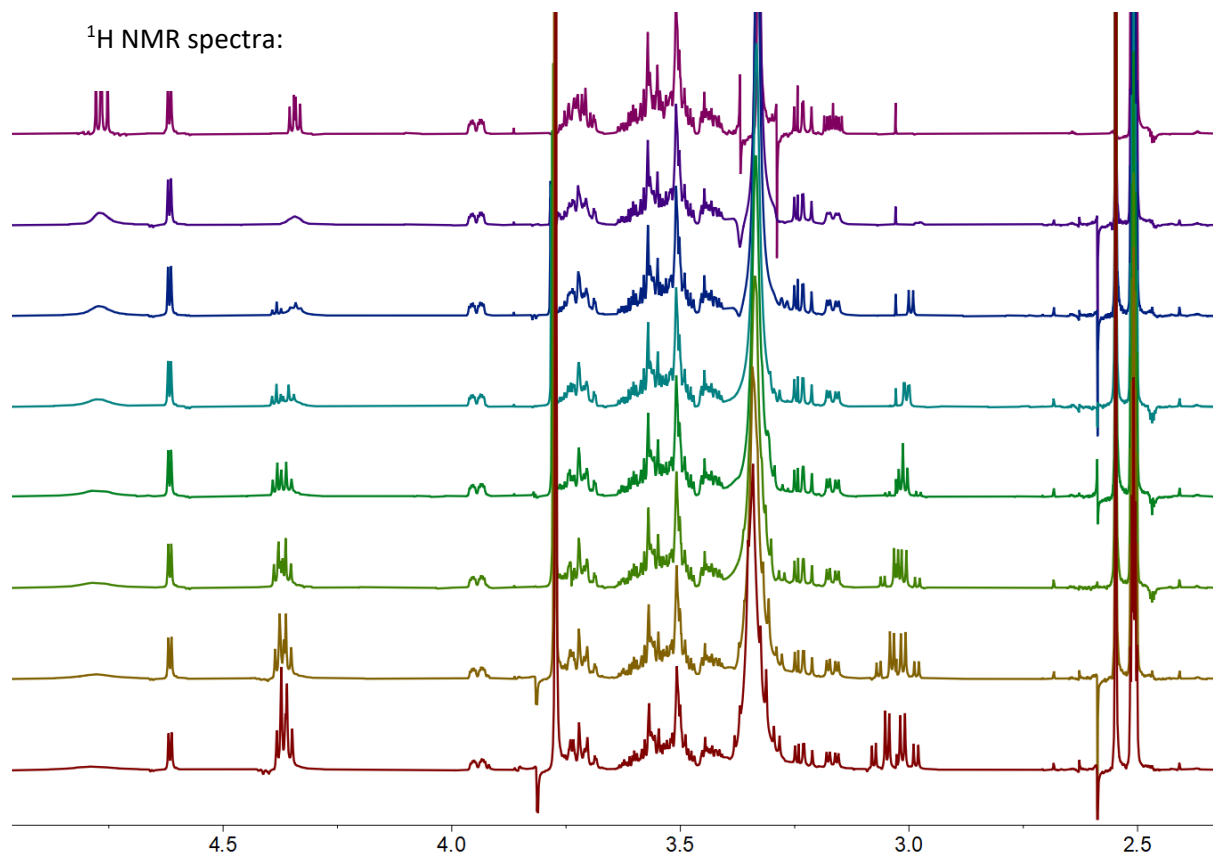

Summary of chemical shift changes:

| Titration | 4.61   | $\Delta$ ppm | 3.94   | $\Delta$ ppm | 3.71   | $\Delta$ ppm | 3.23   | $\Delta$ ppm |
|-----------|--------|--------------|--------|--------------|--------|--------------|--------|--------------|
| 0         | 4.6175 | 0.0000       | 3.9466 | 0.0000       | 3.7122 | 0.0000       | 3.2322 | 0.0000       |
| 1         | 4.6172 | 0.0003       | 3.9458 | 0.0008       | 3.7117 | 0.0005       | 3.232  | 0.0002       |
| 2         | 4.617  | 0.0005       | 3.9454 | 0.0012       | 3.7115 | 0.0007       | 3.2318 | 0.0004       |
| 3         | 4.6169 | 0.0006       | 3.9452 | 0.0014       | 3.7113 | 0.0009       | 3.2317 | 0.0005       |
| 4         | 4.6168 | 0.0007       | 3.9449 | 0.0017       | 3.7111 | 0.0011       | 3.2315 | 0.0007       |
| 5         | 4.6165 | 0.0010       | 3.9444 | 0.0022       | 3.7108 | 0.0014       | 3.2312 | 0.0010       |
| 6         | 4.6162 | 0.0013       | 3.9435 | 0.0031       | 3.7104 | 0.0018       | 3.2309 | 0.0013       |
| 7         | 4.616  | 0.0015       | 3.9433 | 0.0033       | 3.7099 | 0.0023       | 3.2306 | 0.0016       |

Plot of chemical shift change vs guest concentration:

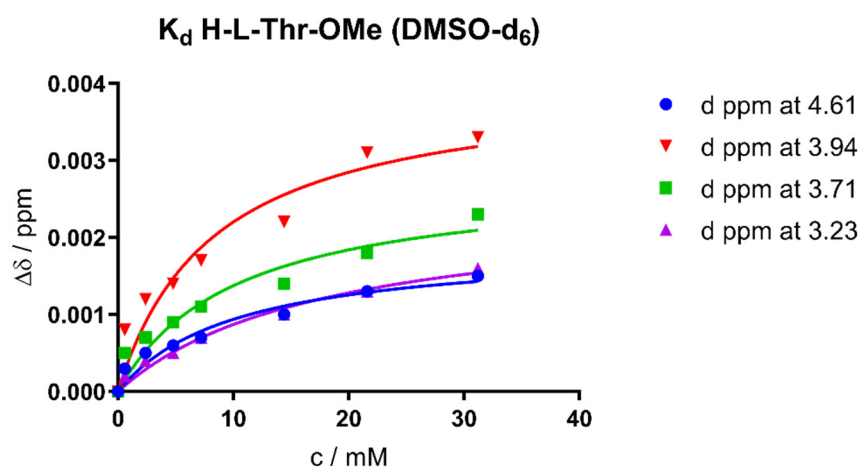

$K_d$  values obtained by fitting the data for selected protons into the single-site specific binding model:

|                  |       |        |        |        |
|------------------|-------|--------|--------|--------|
| <b>Kd</b>        | 10.6  | 8.55   | 10.58  | 8.81   |
| <b>R squared</b> | 0.954 | 0.9358 | 0.9337 | 0.9829 |

$$K_d = 9.64 \pm 0.96 \text{ mM} \rightarrow K_a = 104 \pm 10 \text{ M}^{-1}$$

# H-D-Thr-OMe x HCl to receptor 1:

<sup>1</sup>H NMR spectra:

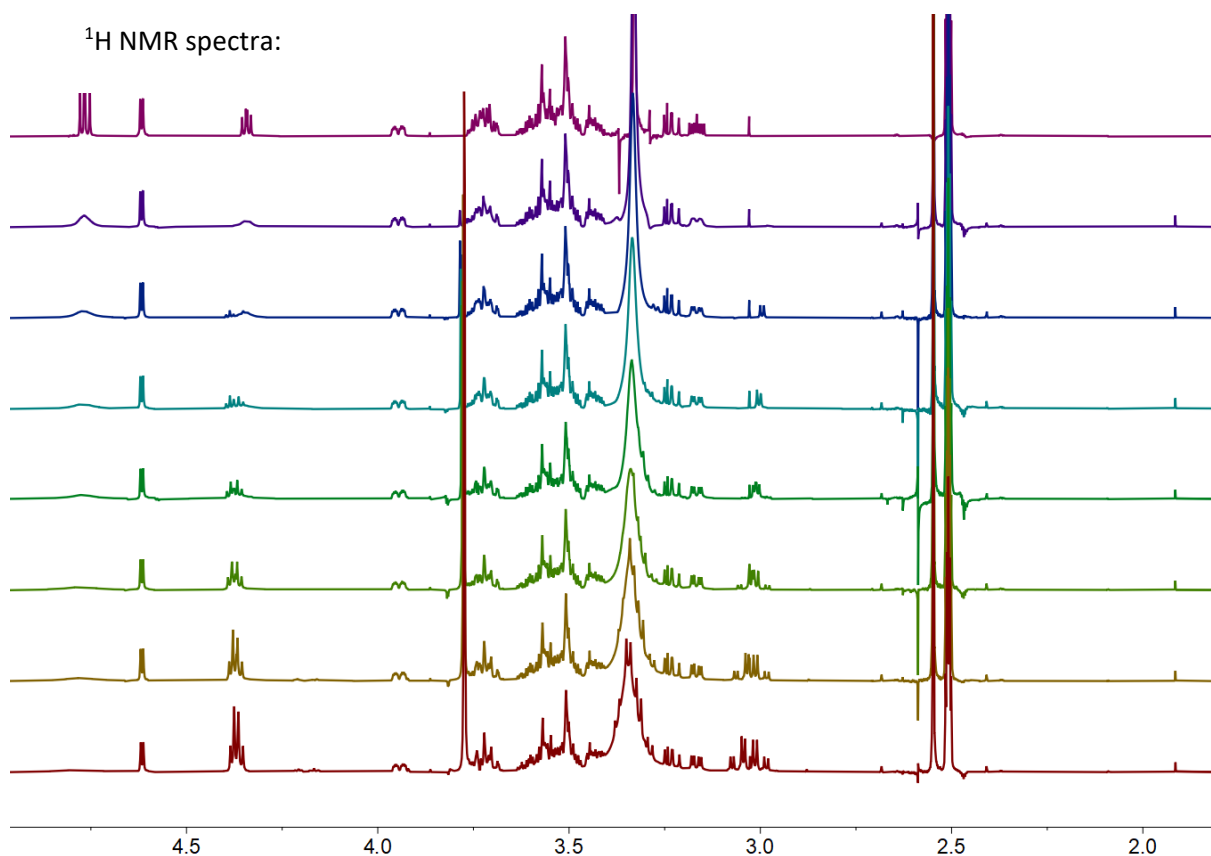

Summary of chemical shift changes:

| Titration | 4.62   | $\Delta$ ppm | 3.94   | $\Delta$ ppm | 3.71   | $\Delta$ ppm | 3.23   | $\Delta$ ppm |
|-----------|--------|--------------|--------|--------------|--------|--------------|--------|--------------|
| 0         | 4.6174 | 0.0000       | 3.9466 | 0.0000       | 3.7106 | 0.0000       | 3.2322 | 0.0000       |
| 1         | 4.6172 | 0.0002       | 3.9462 | 0.0004       | 3.7099 | 0.0007       | 3.232  | 0.0002       |
| 2         | 4.6171 | 0.0003       | 3.9458 | 0.0008       | 3.7098 | 0.0008       | 3.2318 | 0.0004       |
| 3         | 4.617  | 0.0004       | 3.9453 | 0.0013       | 3.7095 | 0.0011       | 3.2317 | 0.0005       |
| 4         | 4.6168 | 0.0006       | 3.945  | 0.0016       | 3.709  | 0.0016       | 3.2314 | 0.0008       |
| 5         | 4.6165 | 0.0009       | 3.9444 | 0.0022       | 3.7086 | 0.0020       | 3.2312 | 0.0010       |
| 6         | 4.6163 | 0.0011       | 3.9438 | 0.0028       | 3.7081 | 0.0025       | 3.2308 | 0.0014       |
| 7         | 4.616  | 0.0014       | 3.9431 | 0.0035       | 3.7073 | 0.0033       | 3.2304 | 0.0018       |

Plot of chemical shift change vs guest concentration:

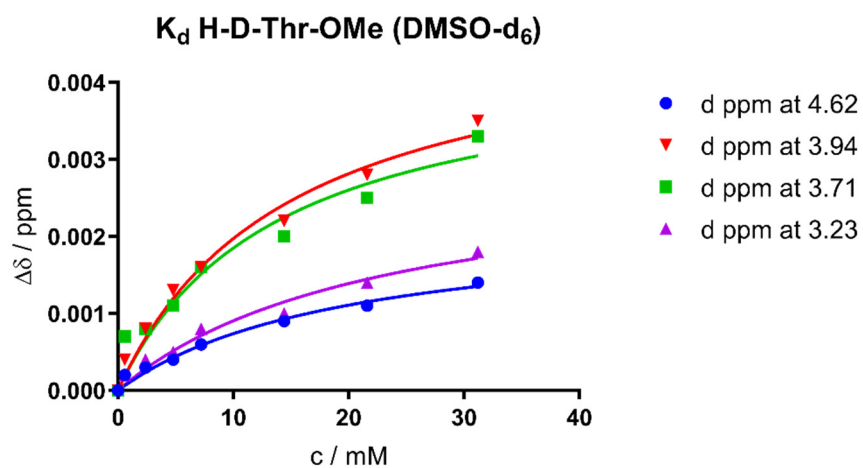

$K_d$  values obtained by fitting the data for selected protons into the single-site specific binding model:

|                  |        |        |        |        |
|------------------|--------|--------|--------|--------|
| <b>Kd</b>        | 21.28  | 15.71  | 14.34  | 14.3   |
| <b>R squared</b> | 0.9839 | 0.9827 | 0.9457 | 0.9763 |

$$K_d = 16.40 \pm 2.87 \text{ mM} \rightarrow K_a = 61 \pm 11 \text{ M}^{-1}$$

### H-L-Val-OMe x HCl to receptor 1:

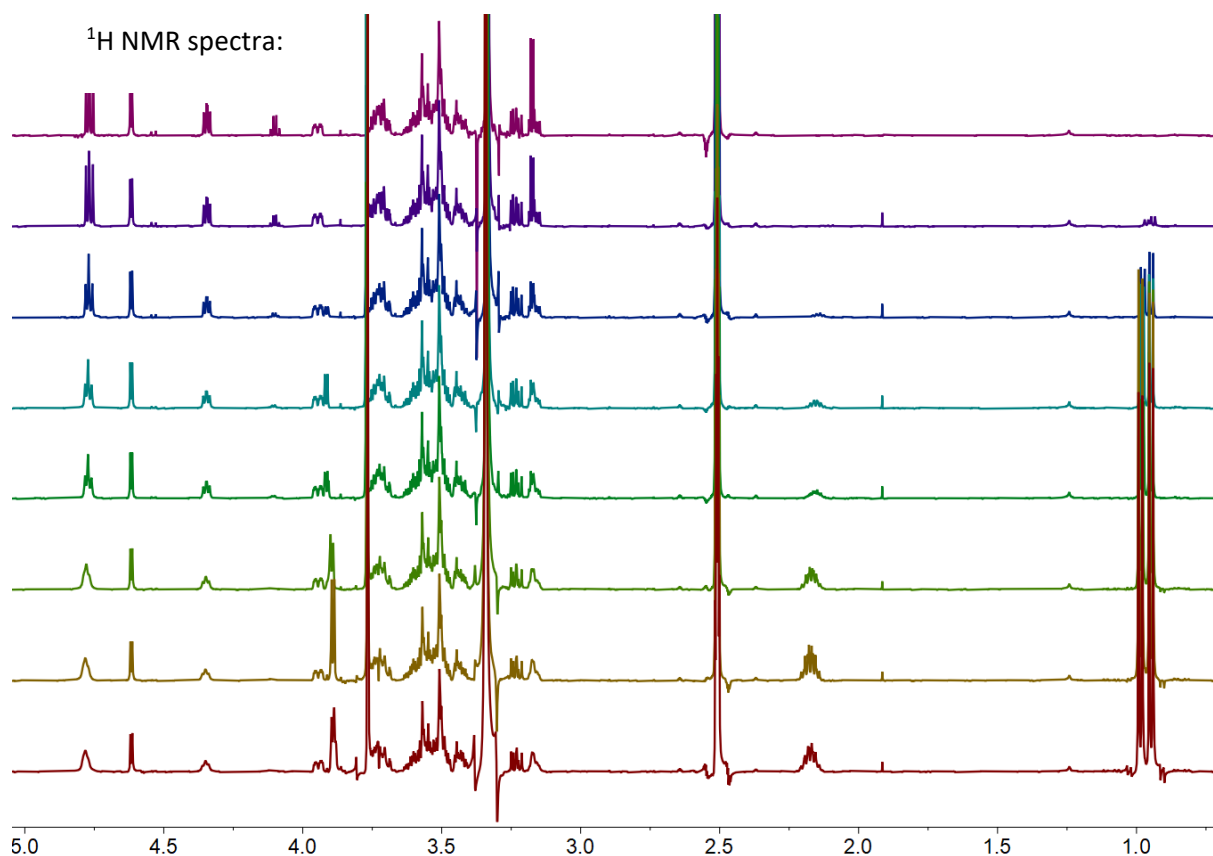

Summary of chemical shift changes:

| Titration | 4.34   | $\Delta$ ppm | 3.94   | $\Delta$ ppm | 3.59   | $\Delta$ ppm | 3.54   | $\Delta$ ppm |
|-----------|--------|--------------|--------|--------------|--------|--------------|--------|--------------|
| 0         | 4.3444 | 0.0000       | 3.9467 | 0.0000       | 3.5944 | 0.0000       | 3.5415 | 0.0000       |
| 1         | 4.3453 | 0.0009       | 3.9464 | 0.0003       | 3.5939 | 0.0005       | 3.5409 | 0.0006       |
| 2         | 4.3459 | 0.0015       | 3.9458 | 0.0009       | 3.5937 | 0.0007       | 3.5404 | 0.0011       |
| 3         | 4.3464 | 0.0020       | 3.9457 | 0.0010       | 3.5935 | 0.0009       | 3.5402 | 0.0013       |
| 4         | 4.3466 | 0.0022       | 3.9454 | 0.0013       | 3.5933 | 0.0011       | 3.5401 | 0.0014       |
| 5         | 4.3486 | 0.0042       | 3.9448 | 0.0019       | 3.593  | 0.0014       | 3.5400 | 0.0015       |
| 6         | 4.3488 | 0.0044       | 3.9446 | 0.0021       | 3.5929 | 0.0015       | 3.5397 | 0.0018       |
| 7         | 4.3489 | 0.0045       | 3.9445 | 0.0022       | 3.5929 | 0.0015       | 3.5395 | 0.0020       |

Plot of chemical shift change vs guest concentration:

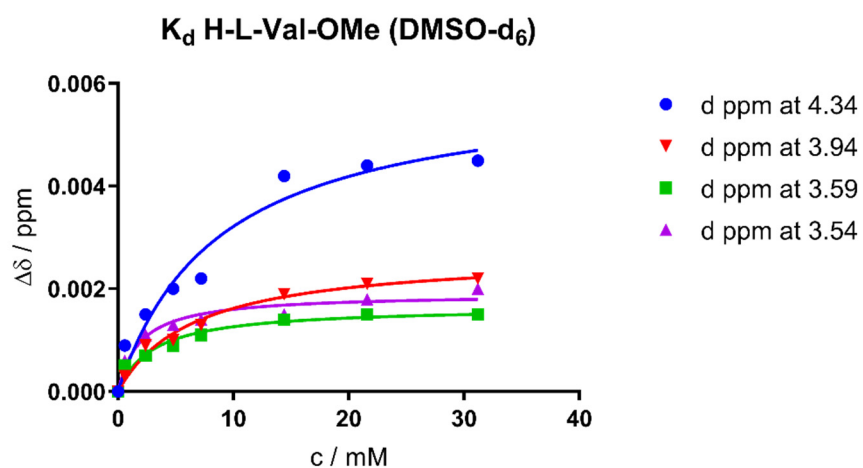



$K_d$  values obtained by fitting the data for selected protons into the single-site specific binding model:

|                  |       |        |        |        |
|------------------|-------|--------|--------|--------|
| <b>Kd</b>        | 8.04  | 6.37   | 3.76   | 3.04   |
| <b>R squared</b> | 0.958 | 0.9876 | 0.9676 | 0.9627 |

$$K_d = 5.30 \pm 2.00 \text{ mM} \rightarrow K_a = 189 \pm 72 \text{ M}^{-1}$$

# H-D-Val-OMe x HCl to receptor 1:

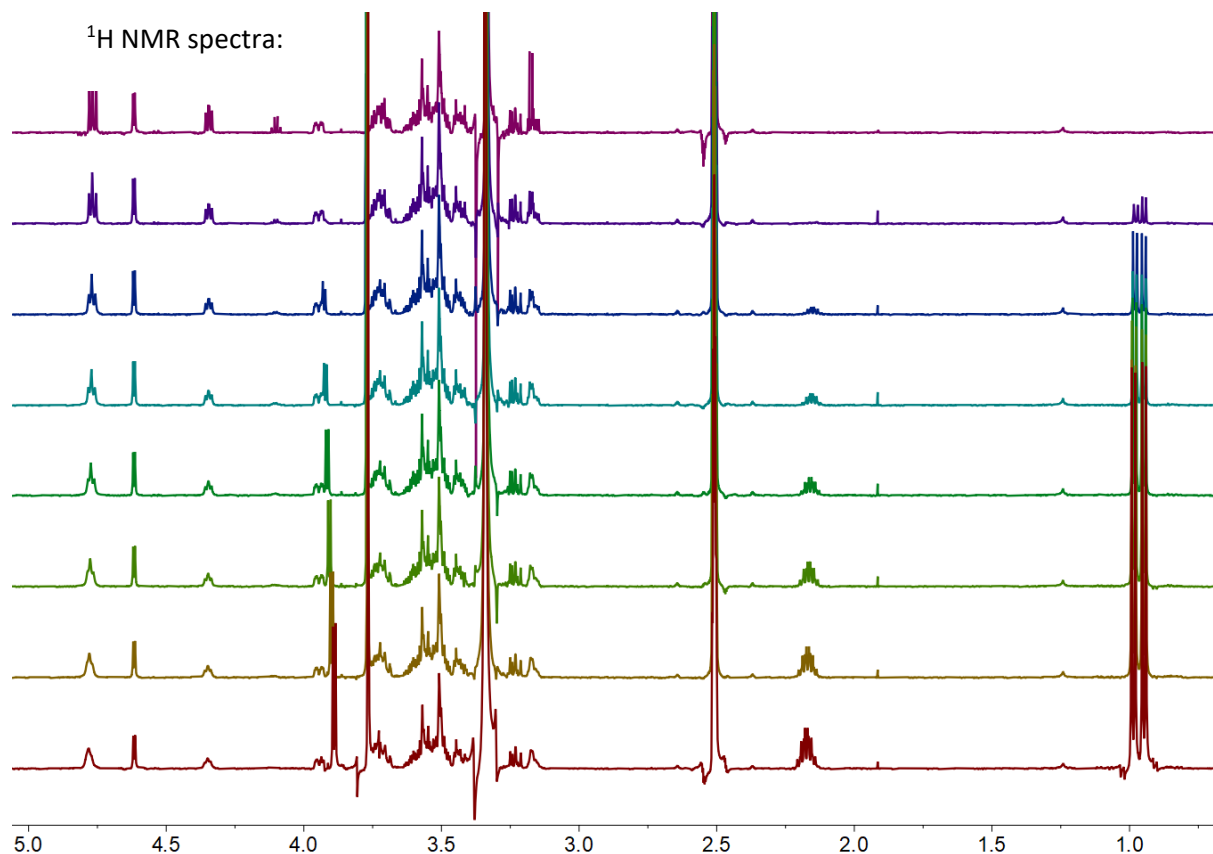

Summary of chemical shift changes:

| Titration | 4.76   | $\Delta$ ppm | 4.34   | $\Delta$ ppm | 3.94   | $\Delta$ ppm | 3.71   | $\Delta$ ppm |
|-----------|--------|--------------|--------|--------------|--------|--------------|--------|--------------|
| 0         | 4.768  | 0.0000       | 4.3448 | 0.0000       | 3.9465 | 0.0000       | 3.7074 | 0.0000       |
| 1         | 4.7687 | 0.0007       | 4.3451 | 0.0003       | 3.9463 | 0.0002       | 3.7071 | 0.0003       |
| 2         | 4.7706 | 0.0026       | 4.3455 | 0.0007       | 3.9457 | 0.0008       | 3.7068 | 0.0006       |
| 3         | 4.7719 | 0.0039       | 4.3459 | 0.0011       | 3.9455 | 0.0010       | 3.7065 | 0.0009       |
| 4         | 4.7739 | 0.0059       | 4.3469 | 0.0021       | 3.9452 | 0.0013       | 3.7062 | 0.0012       |
| 5         | 4.7764 | 0.0084       | 4.3477 | 0.0029       | 3.9448 | 0.0017       | 3.7058 | 0.0016       |
| 6         | 4.779  | 0.0110       | 4.3488 | 0.0040       | 3.9443 | 0.0022       | 3.7053 | 0.0021       |
| 7         | 4.7807 | 0.0127       | 4.3494 | 0.0046       | 3.9439 | 0.0026       | 3.7048 | 0.0026       |

Plot of chemical shift change vs guest concentration:

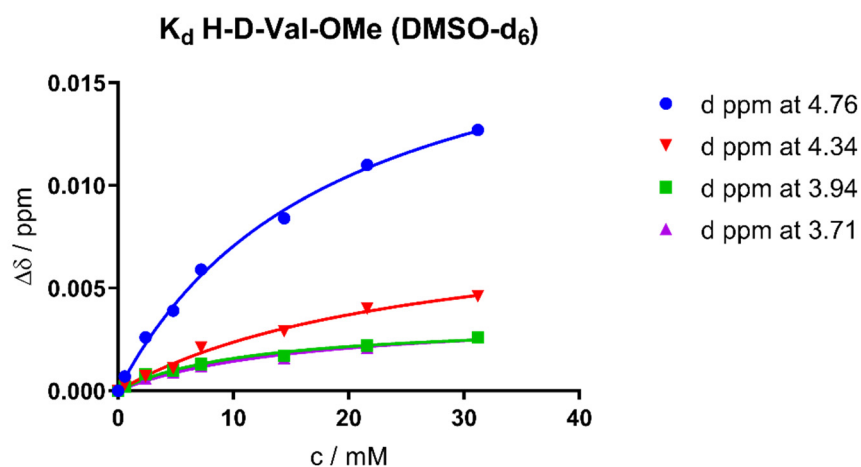

$K_d$  values obtained by fitting the data for selected protons into the single-site specific binding model:

|                      |        |        |        |        |
|----------------------|--------|--------|--------|--------|
| <b>K<sub>d</sub></b> | 19.9   | 25.62  | 13.94  | 16.93  |
| <b>R squared</b>     | 0.9982 | 0.9948 | 0.9838 | 0.9835 |

$$K_d = 19.10 \pm 4.32 \text{ mM} \rightarrow K_a = 52 \pm 12 \text{ M}^{-1}$$

## 5. NMR spectra – receptor 1.

$\text{CDCl}_3$ :  $^1\text{H}$  NMR spectrum

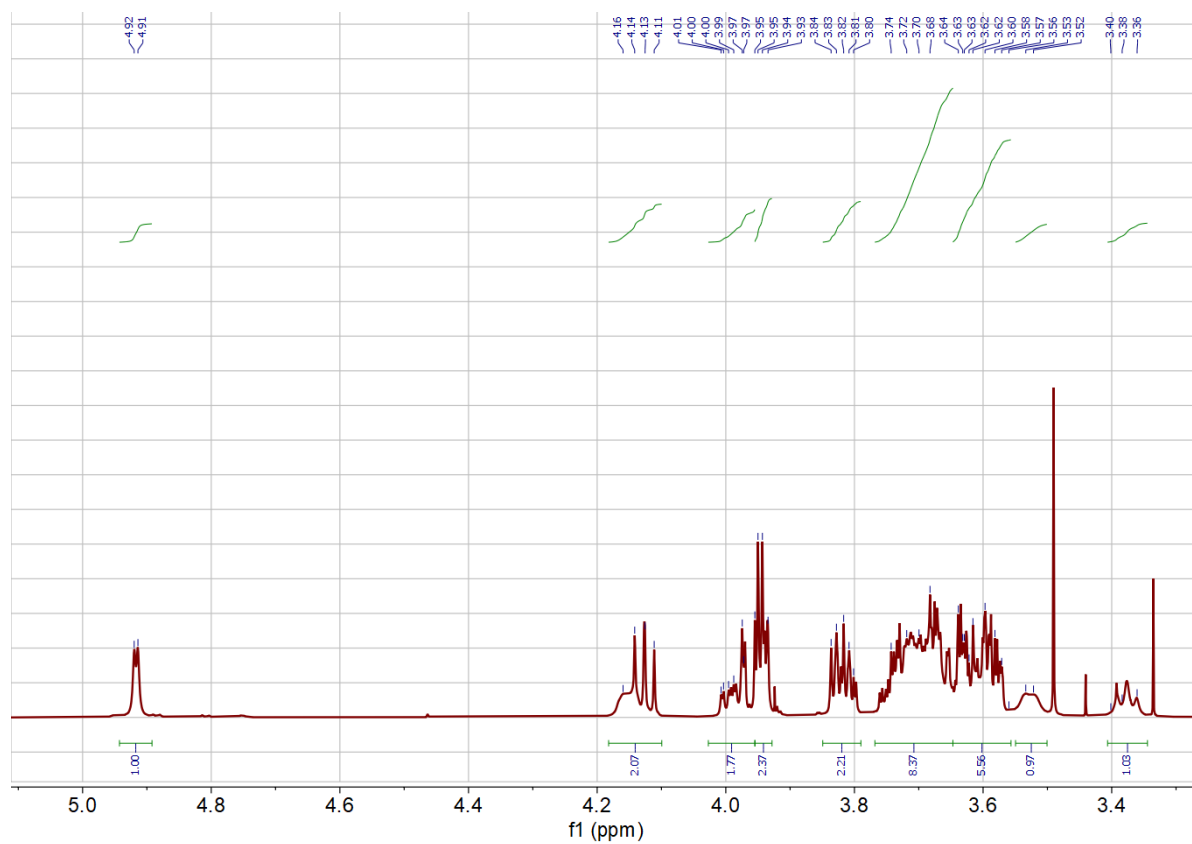

$^{13}\text{C}$  NMR spectrum

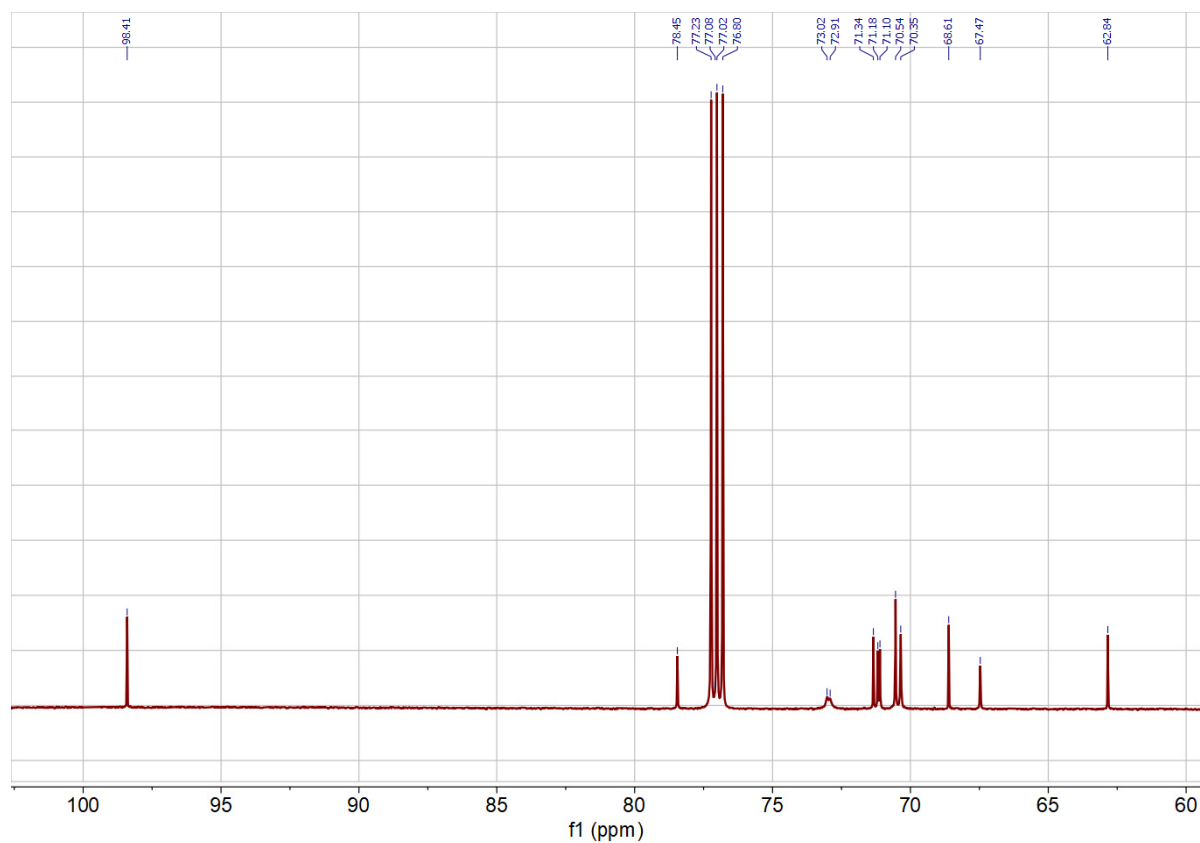

2D COSY spectrum

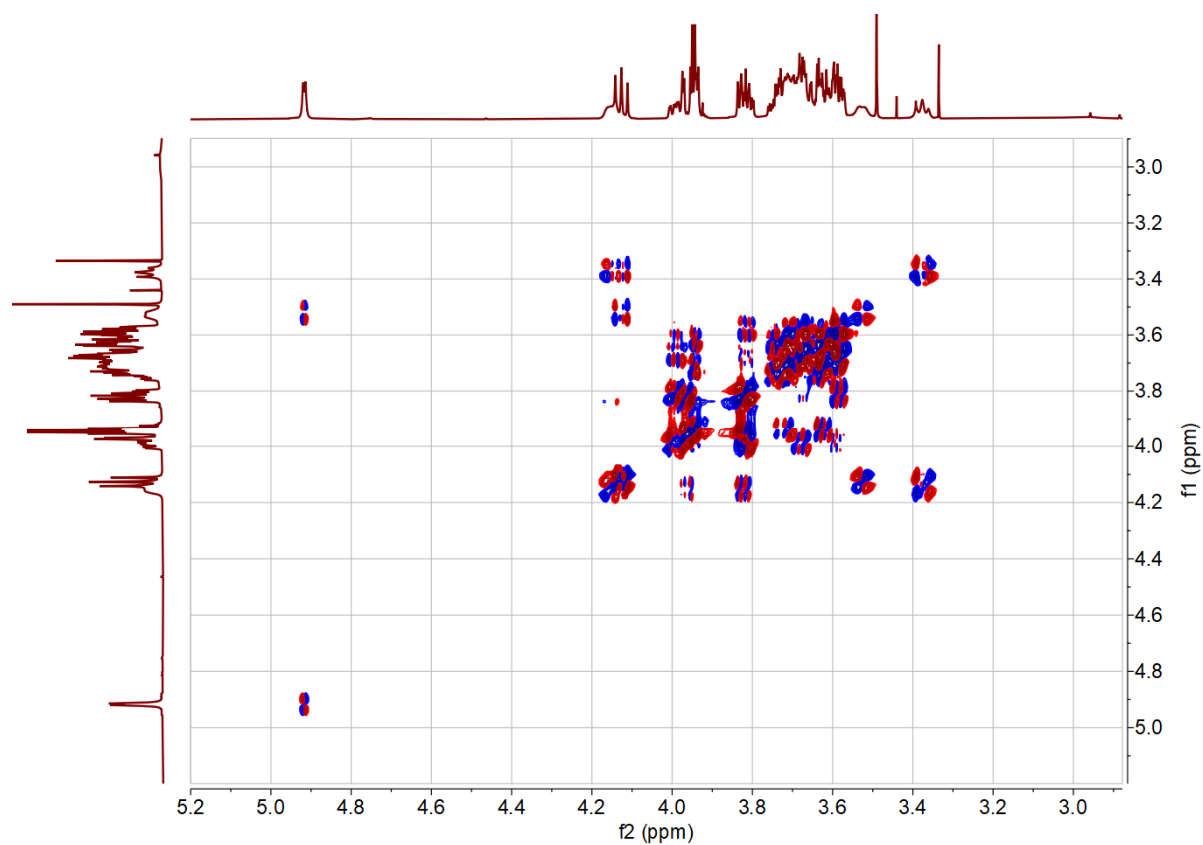

2D HSQC spectrum

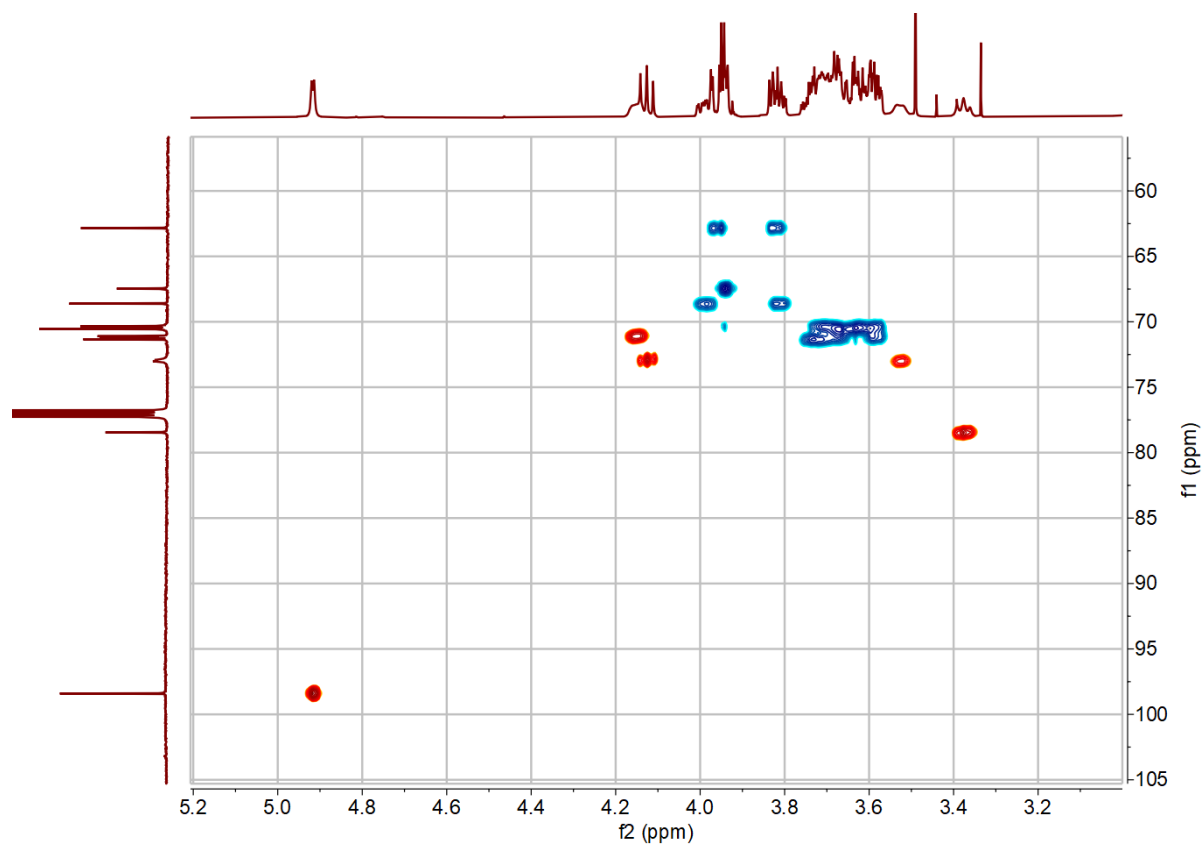

2D HMBC spectrum

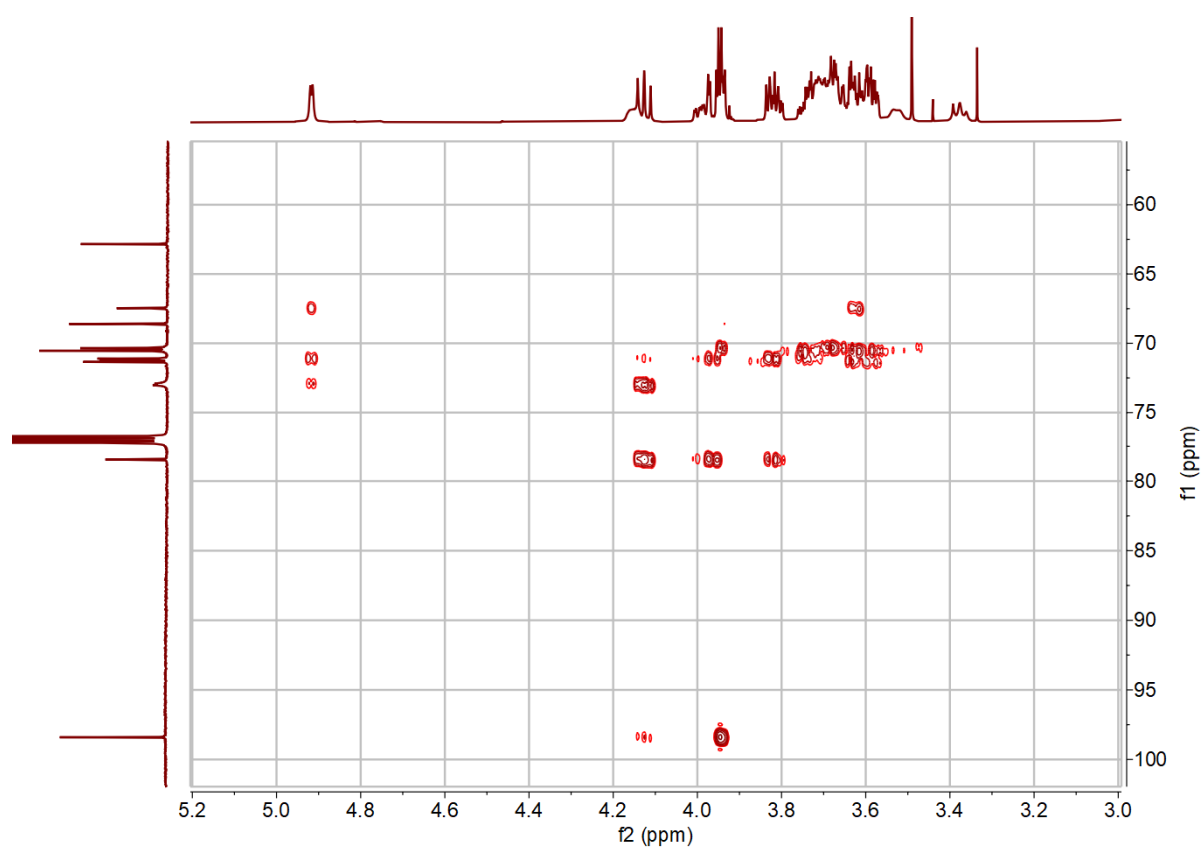

2D NOESY spectrum

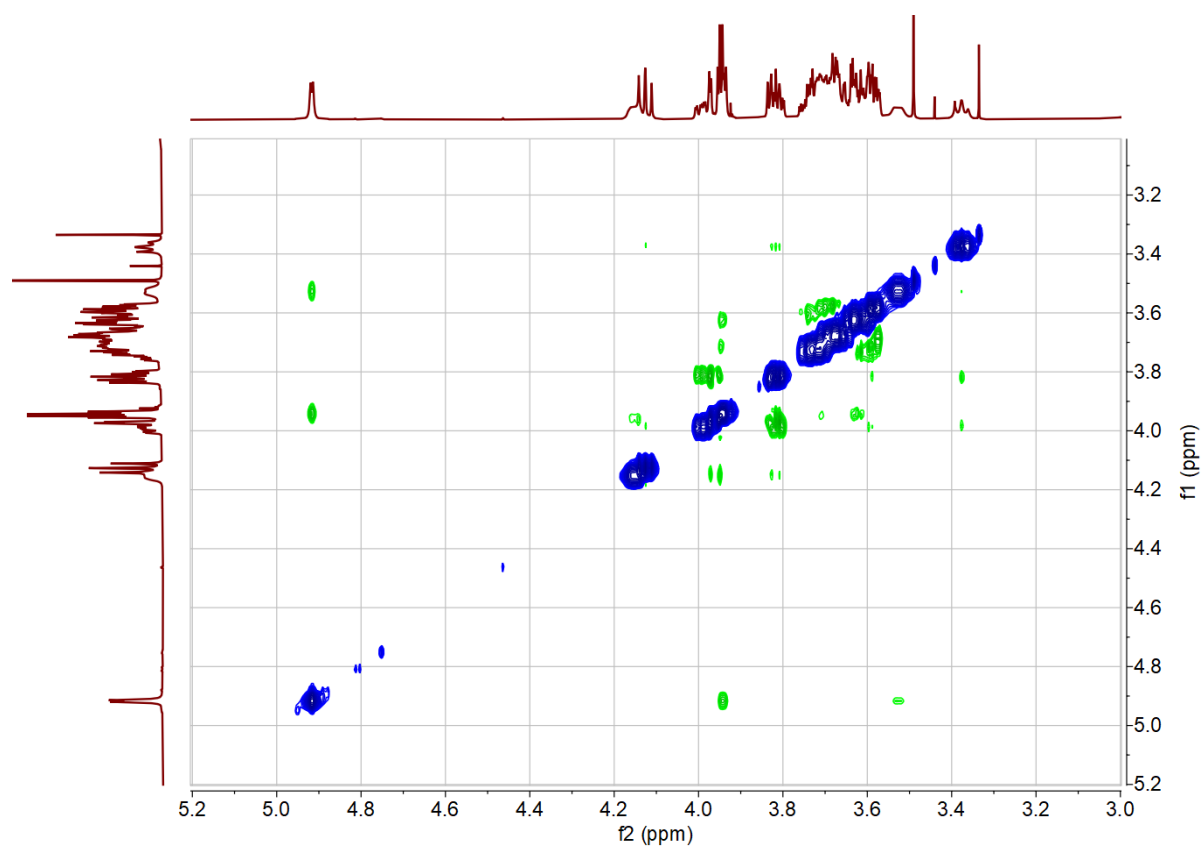

CD<sub>3</sub>CN: <sup>1</sup>H NMR spectrum

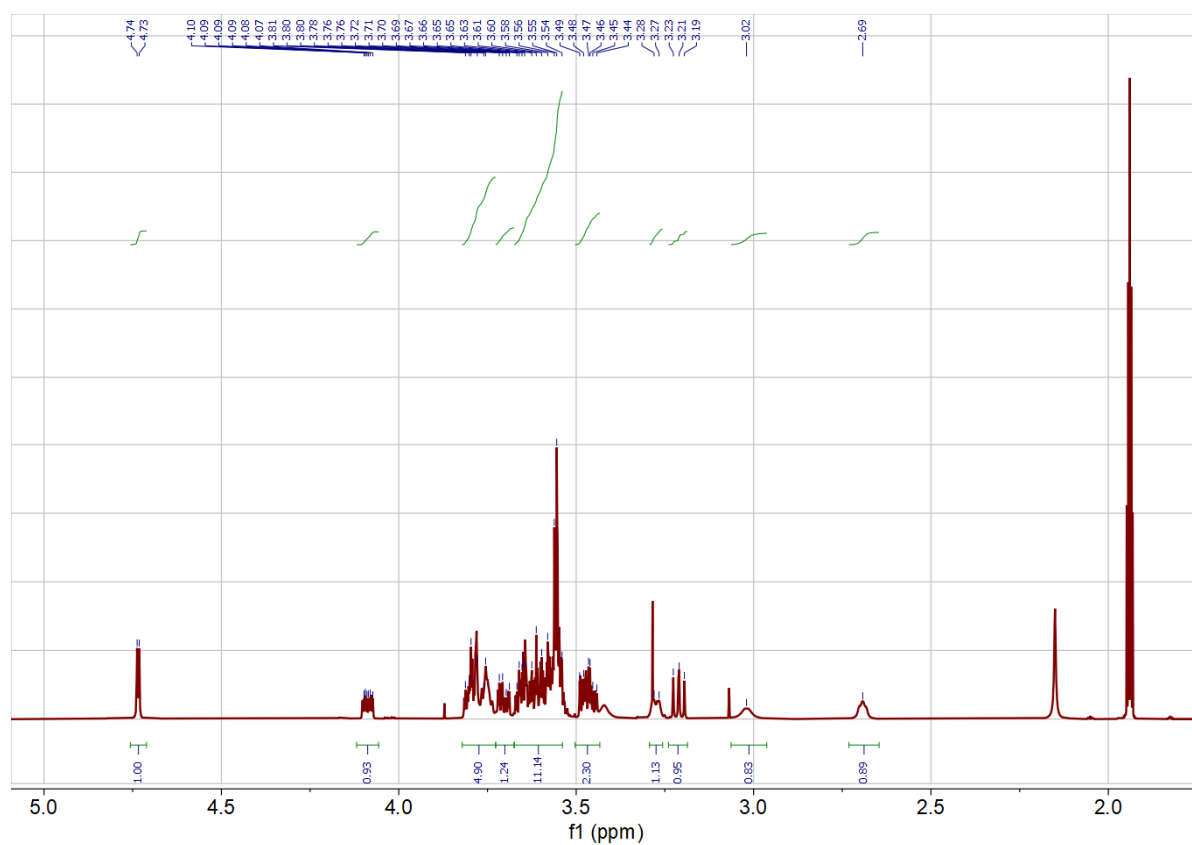

<sup>13</sup>C NMR spectrum

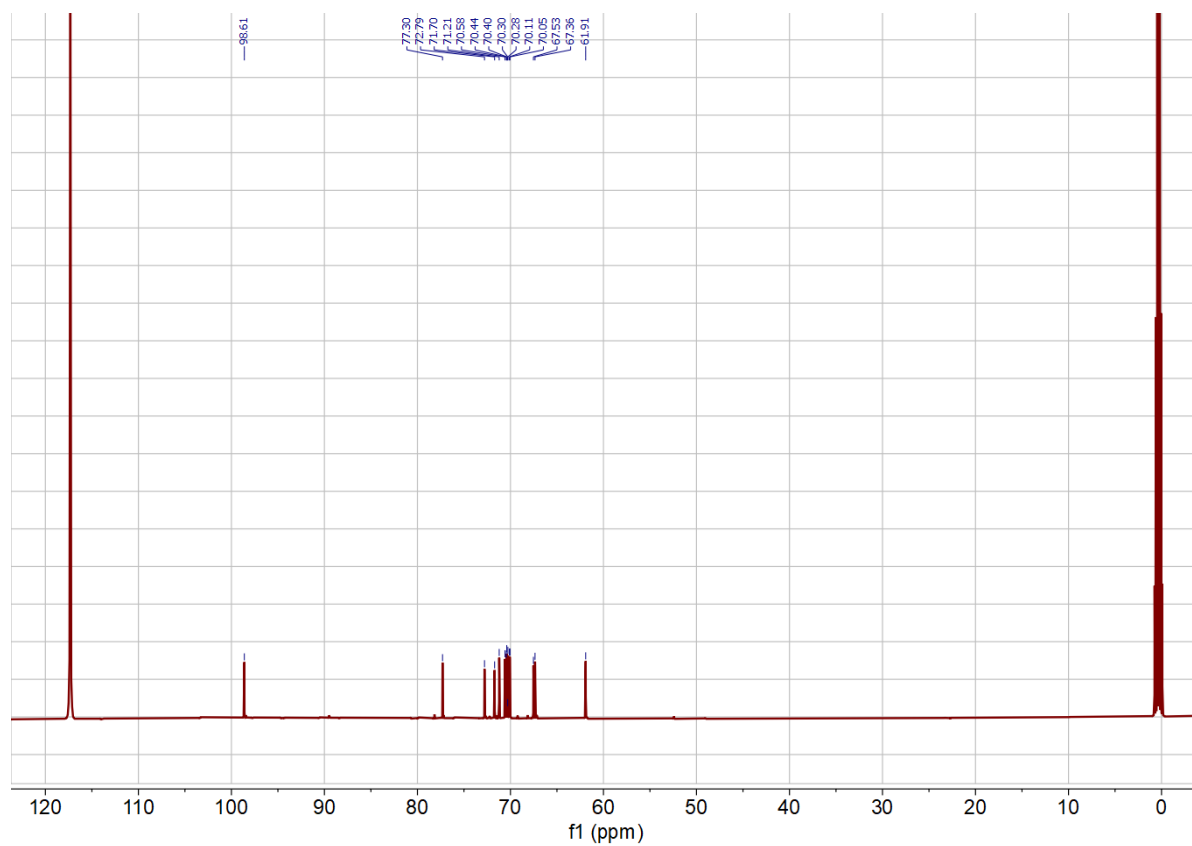

2D COSY spectrum

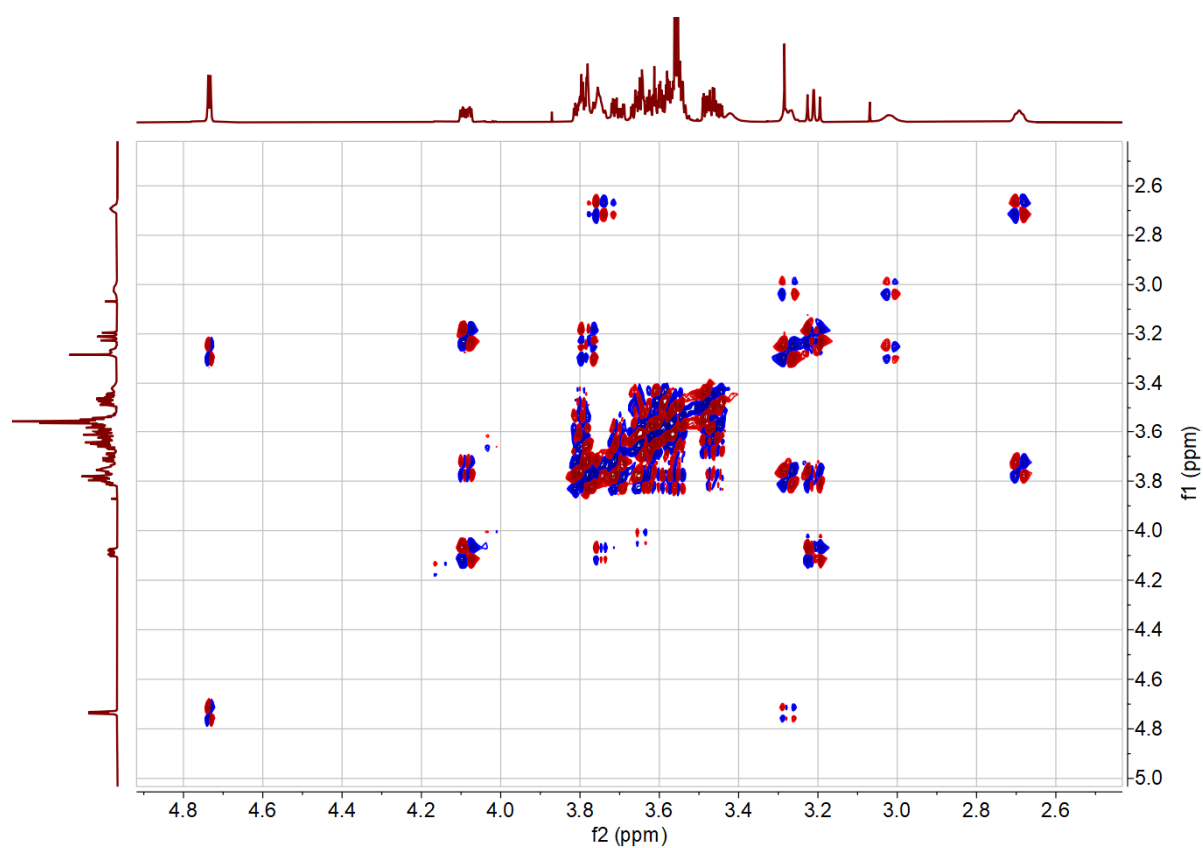

2D HSQC spectrum

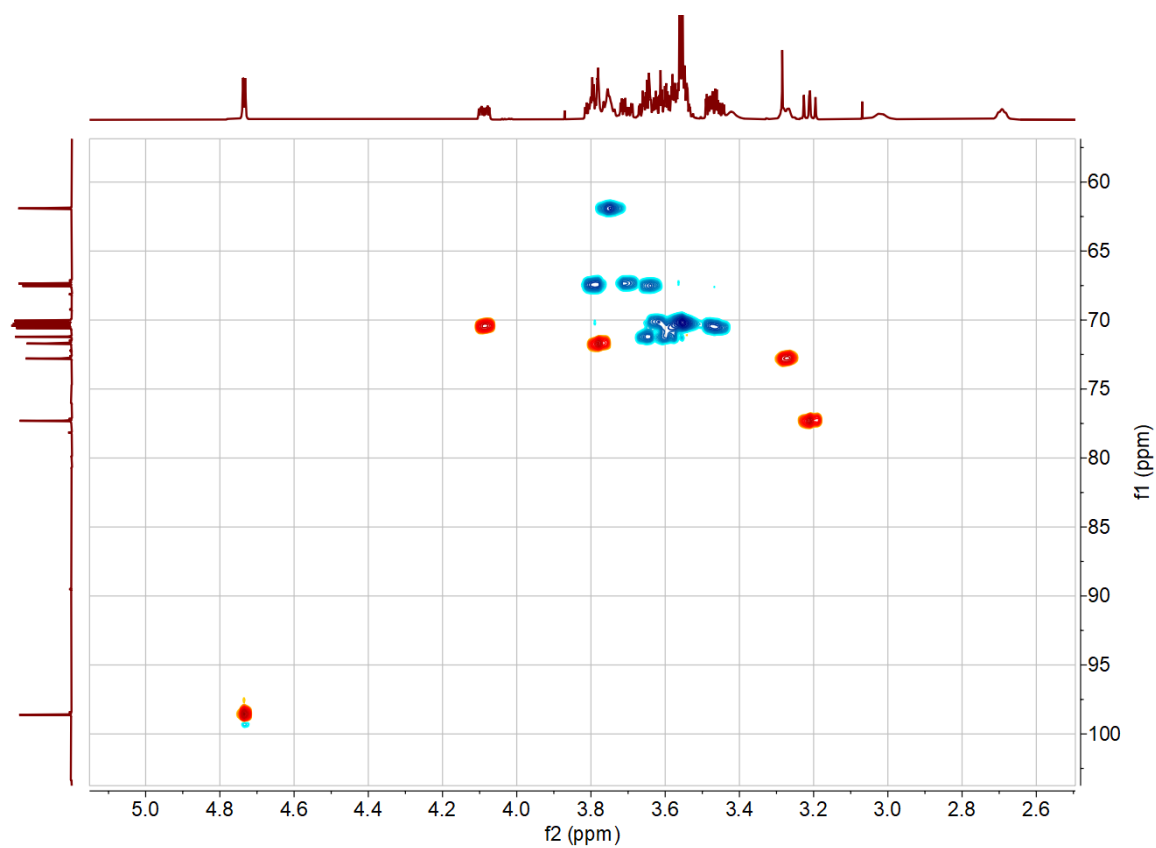



2D HMBC spectrum

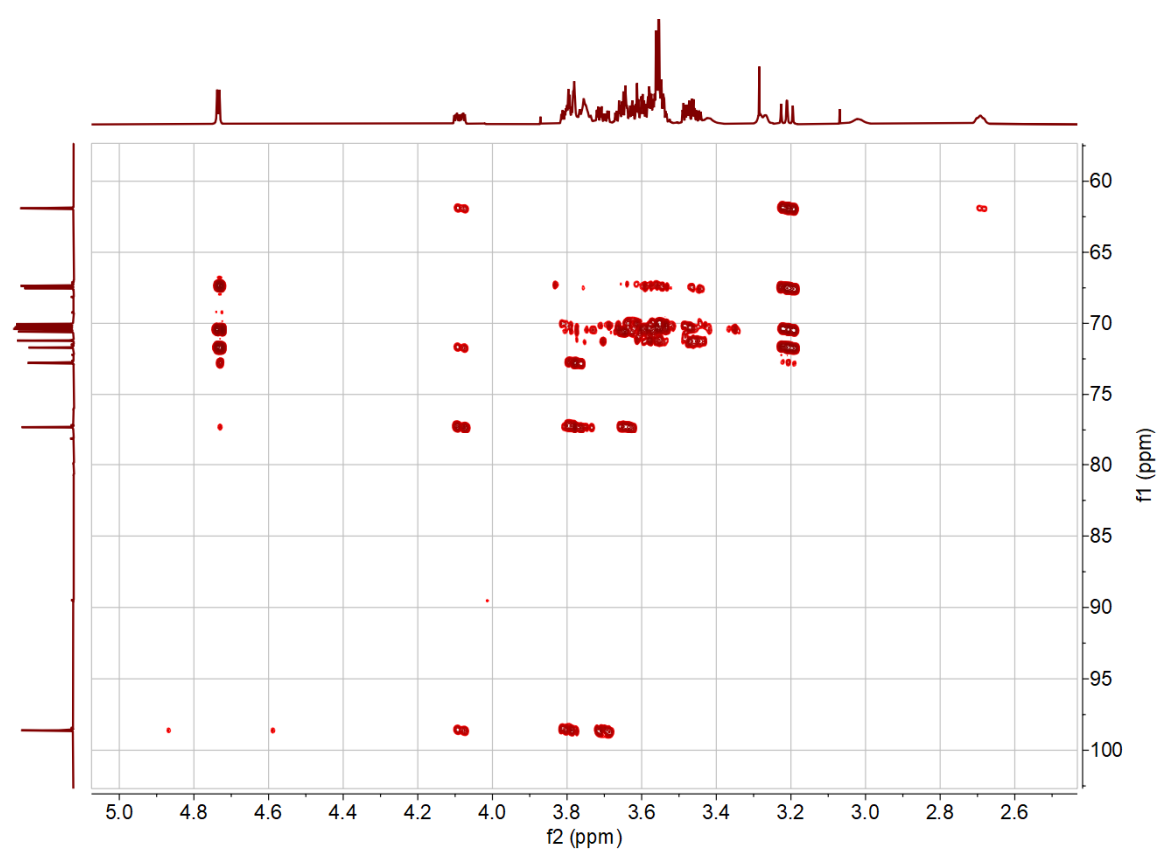

DMSO-d<sub>6</sub>: <sup>1</sup>H NMR spectrum

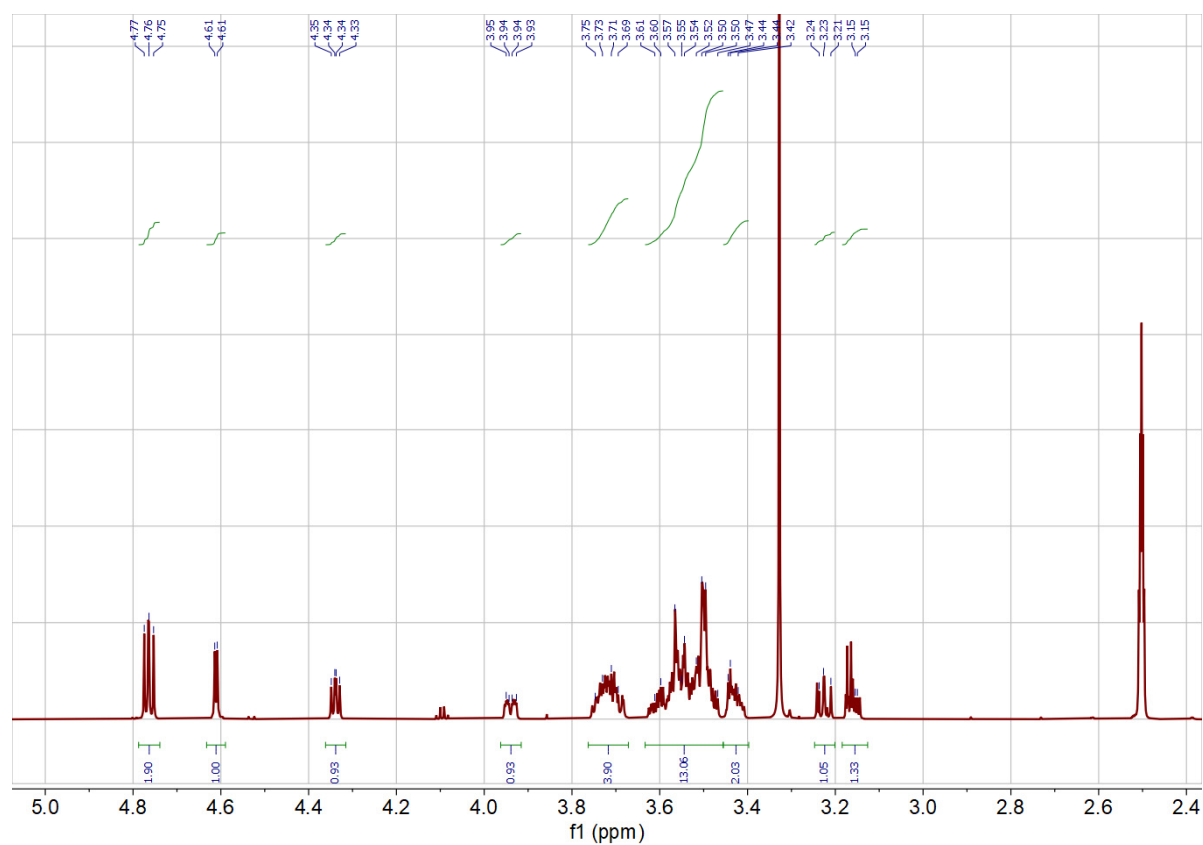

<sup>13</sup>C NMR spectrum

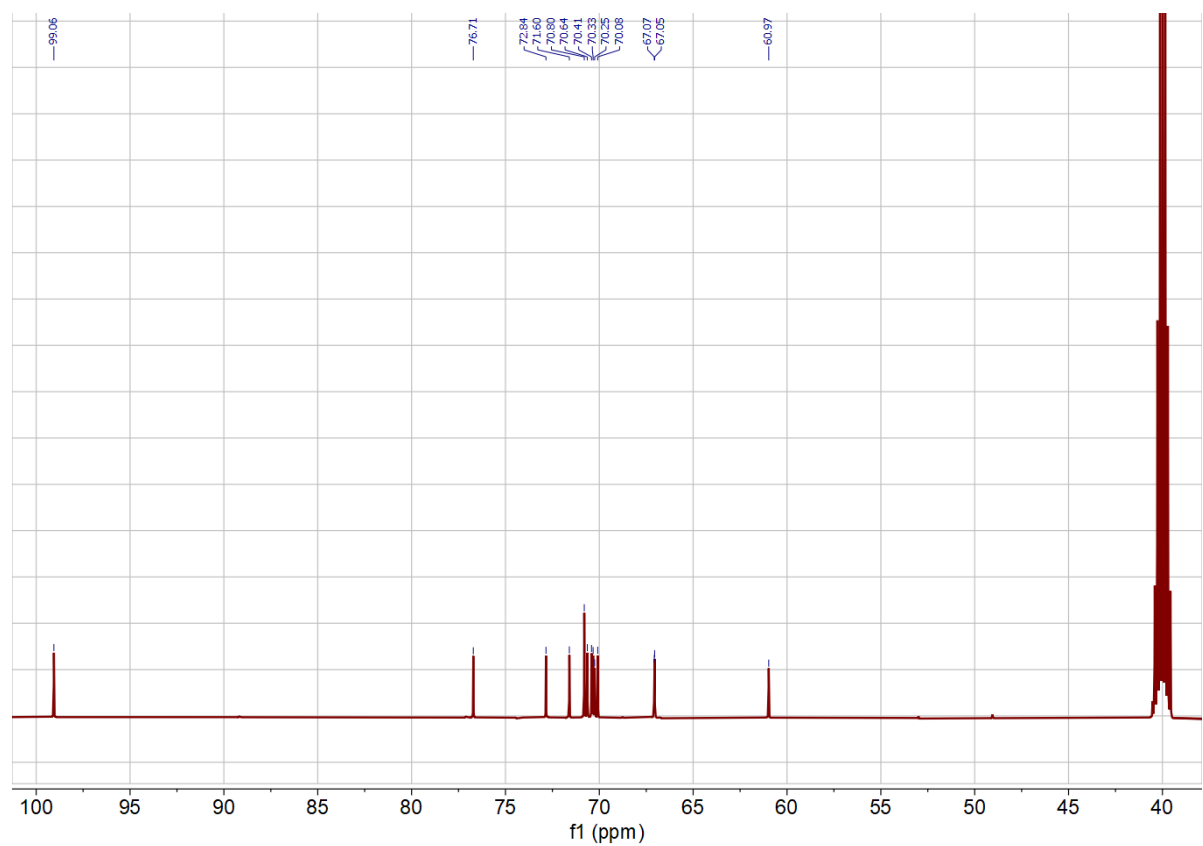

2D COSY spectrum

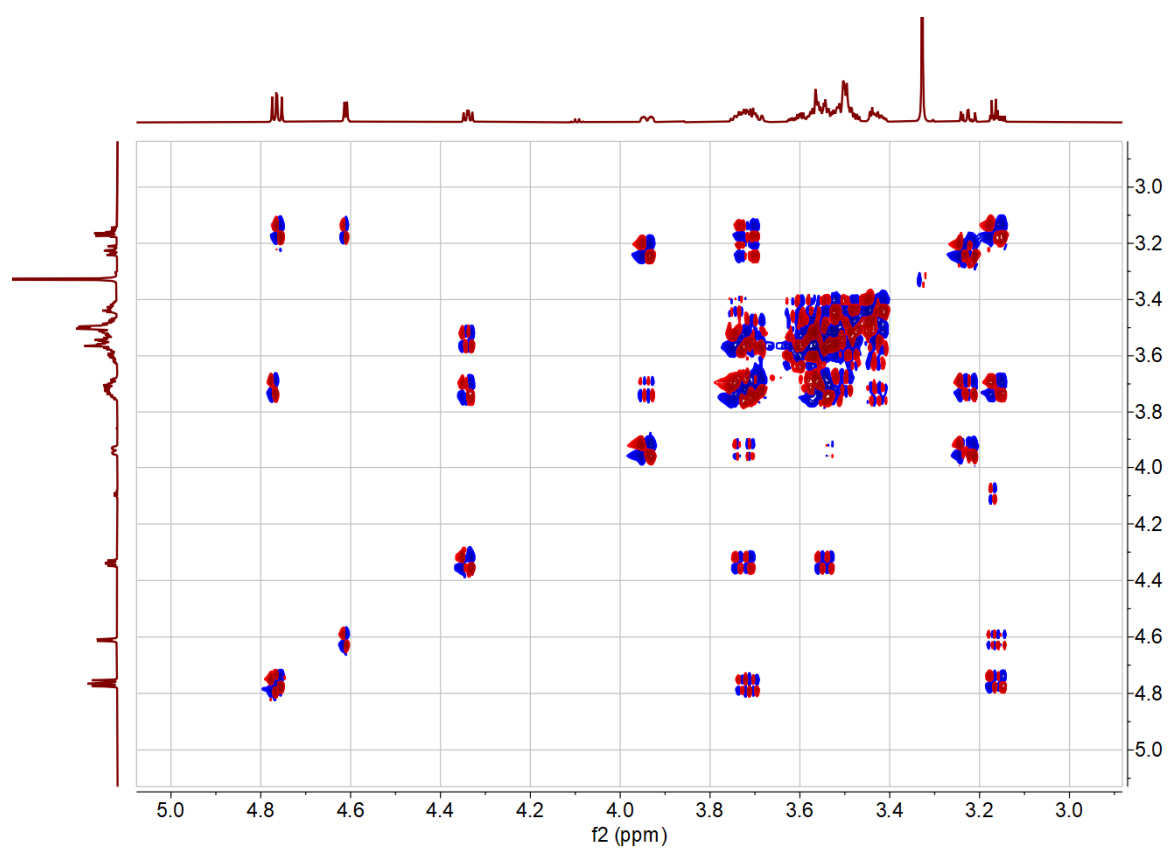

2D HSQC spectrum

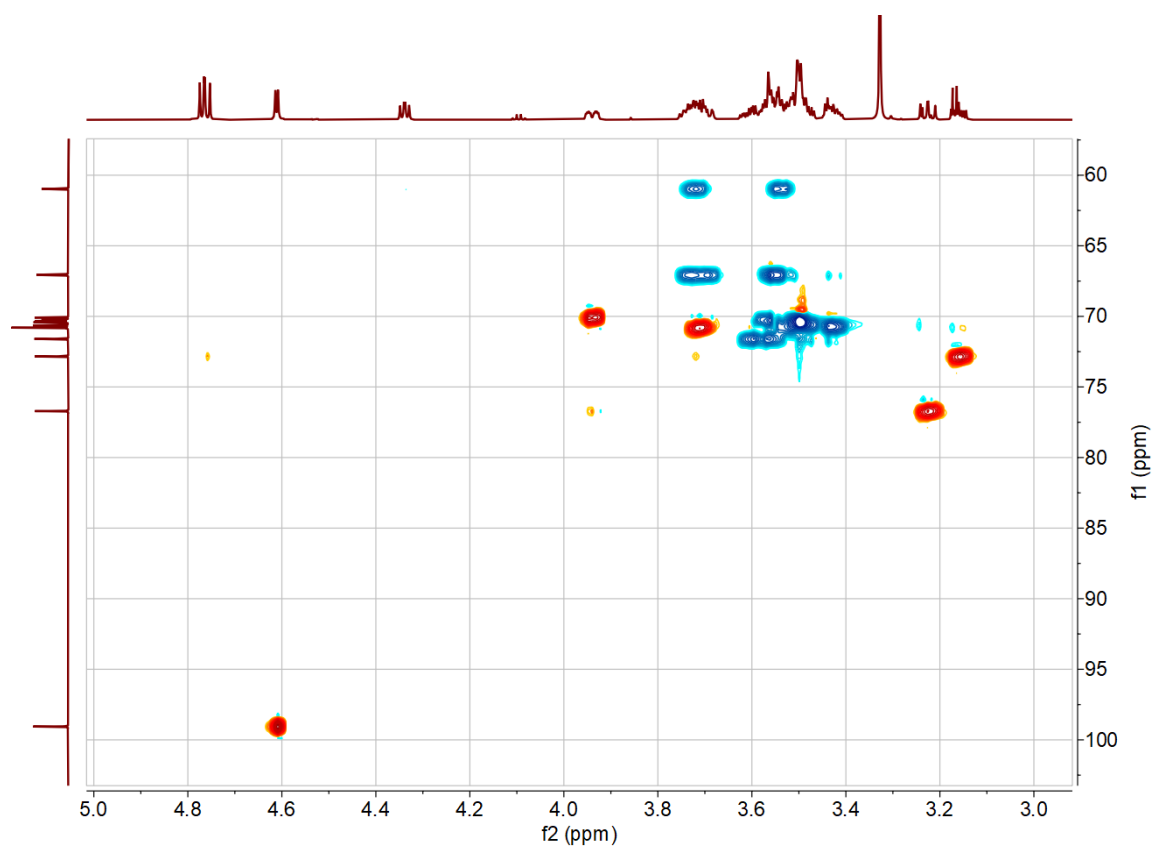

2D HMBC spectrum

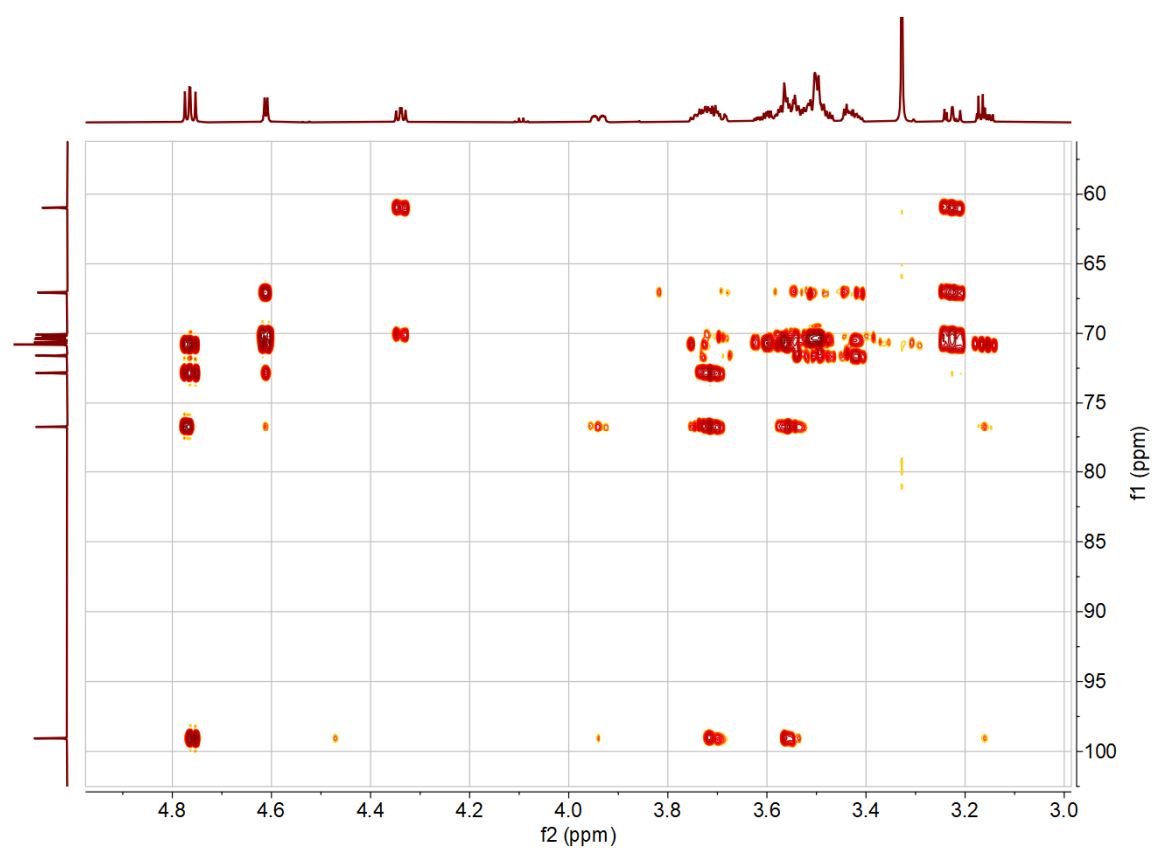

## 6. NMR spectra of 1 + H-Val-OMe complexes in CDCl<sub>3</sub>.

1+H-L-Val-OMe: <sup>1</sup>H NMR spectrum

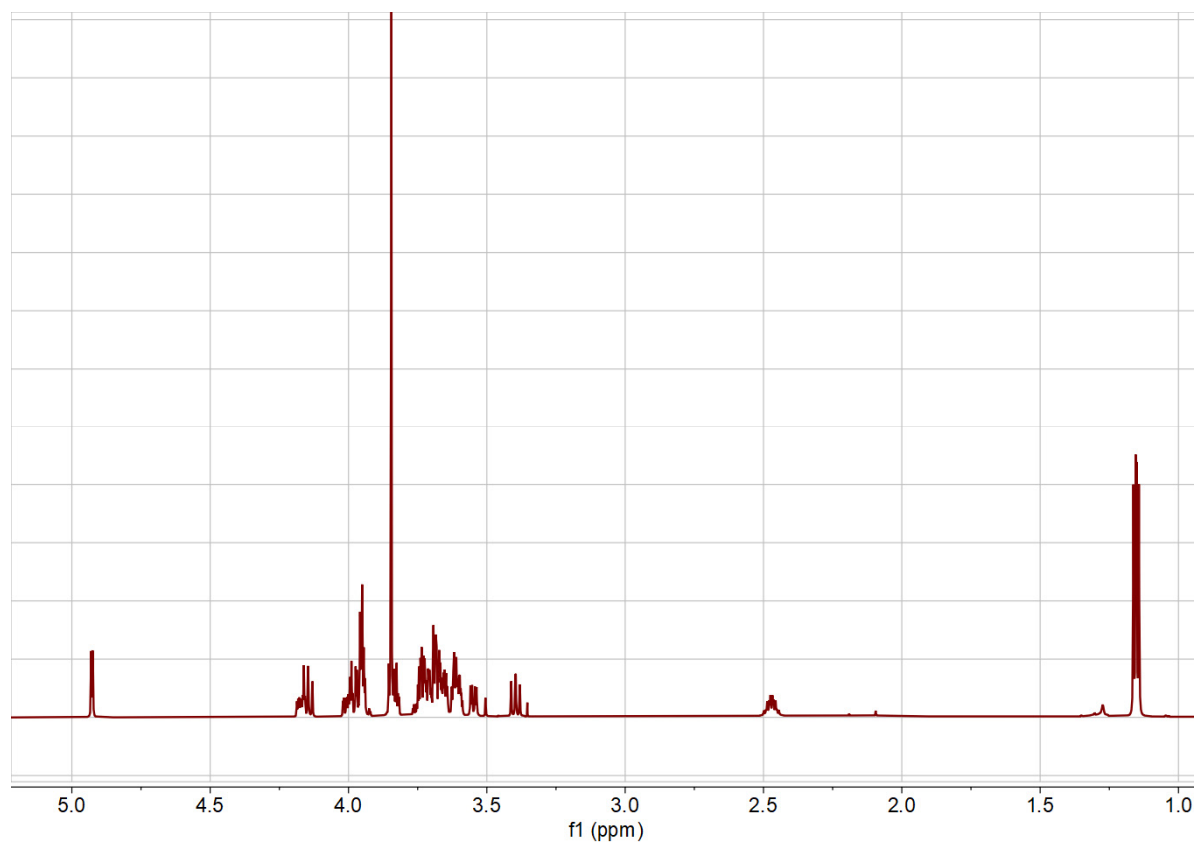

2D COSY NMR spectrum

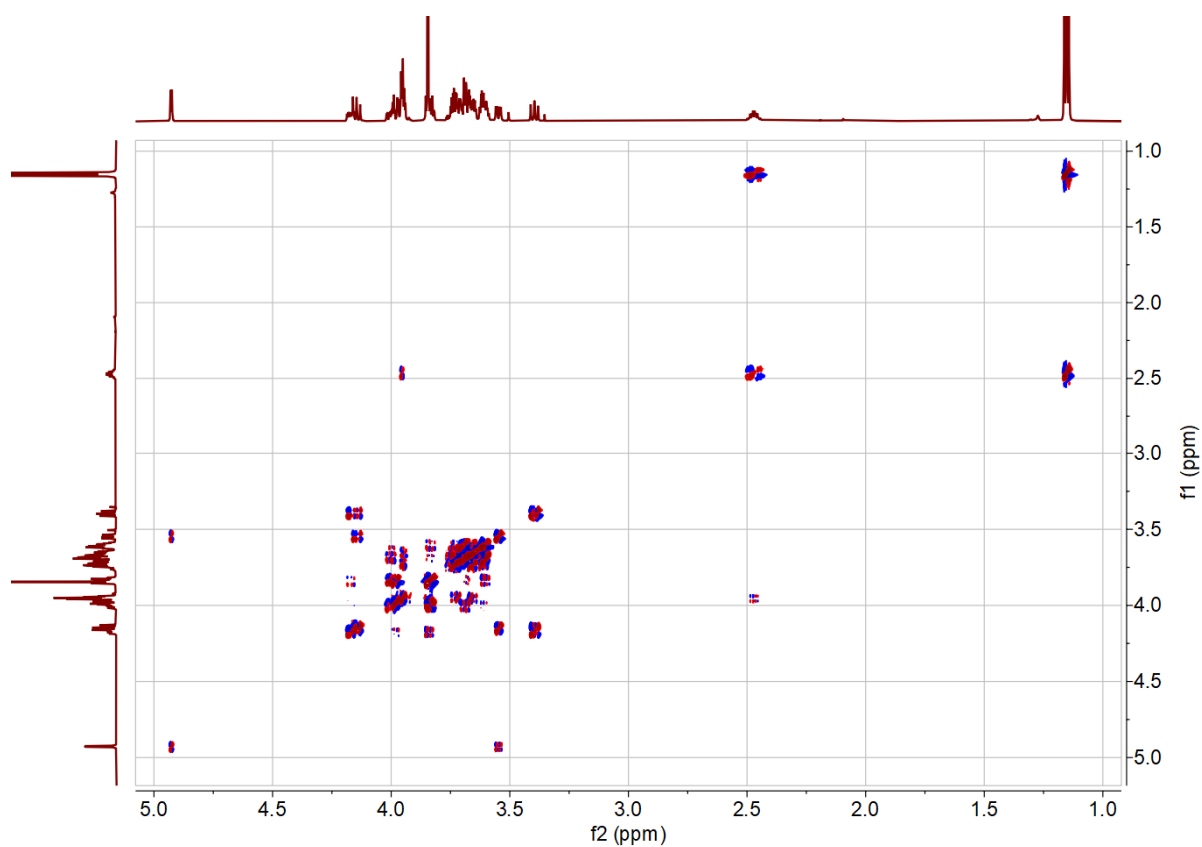

2D NOESY spectrum

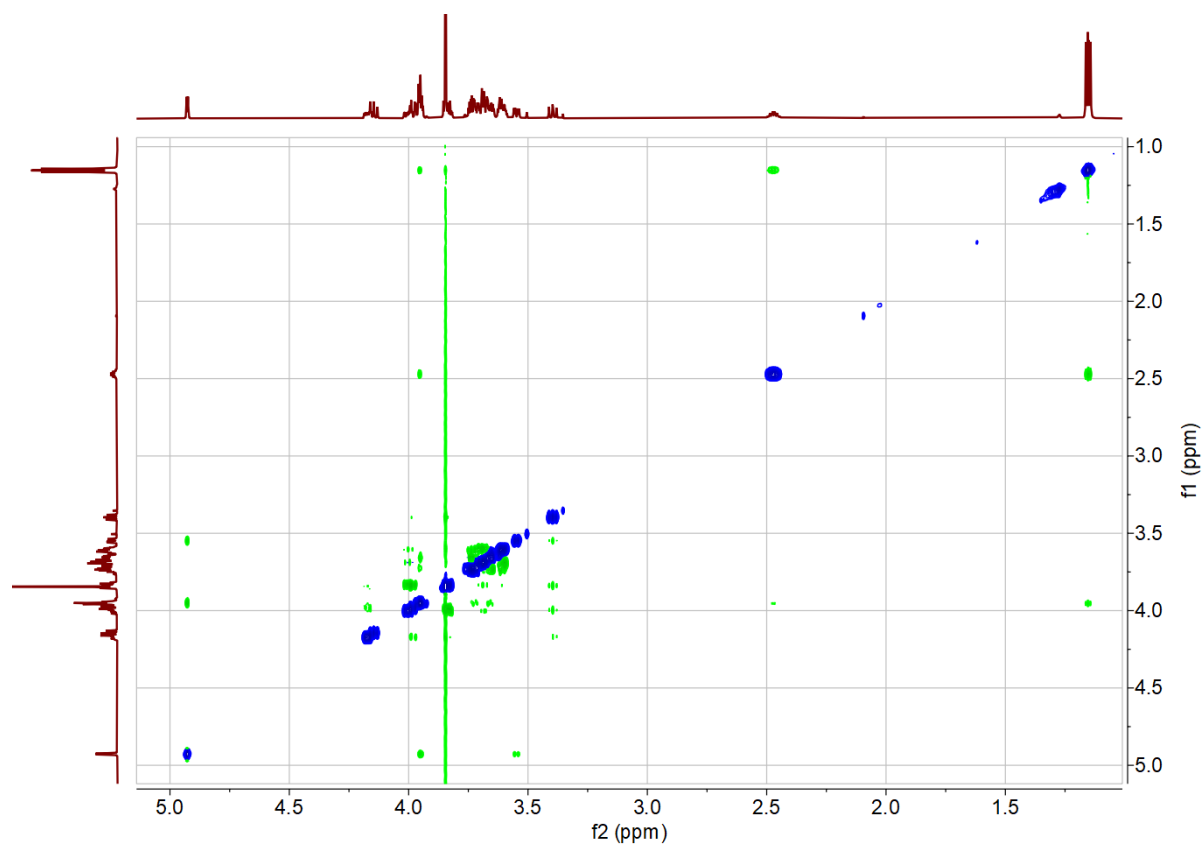

1+H-D-Val-OMe: <sup>1</sup>H NMR spectrum

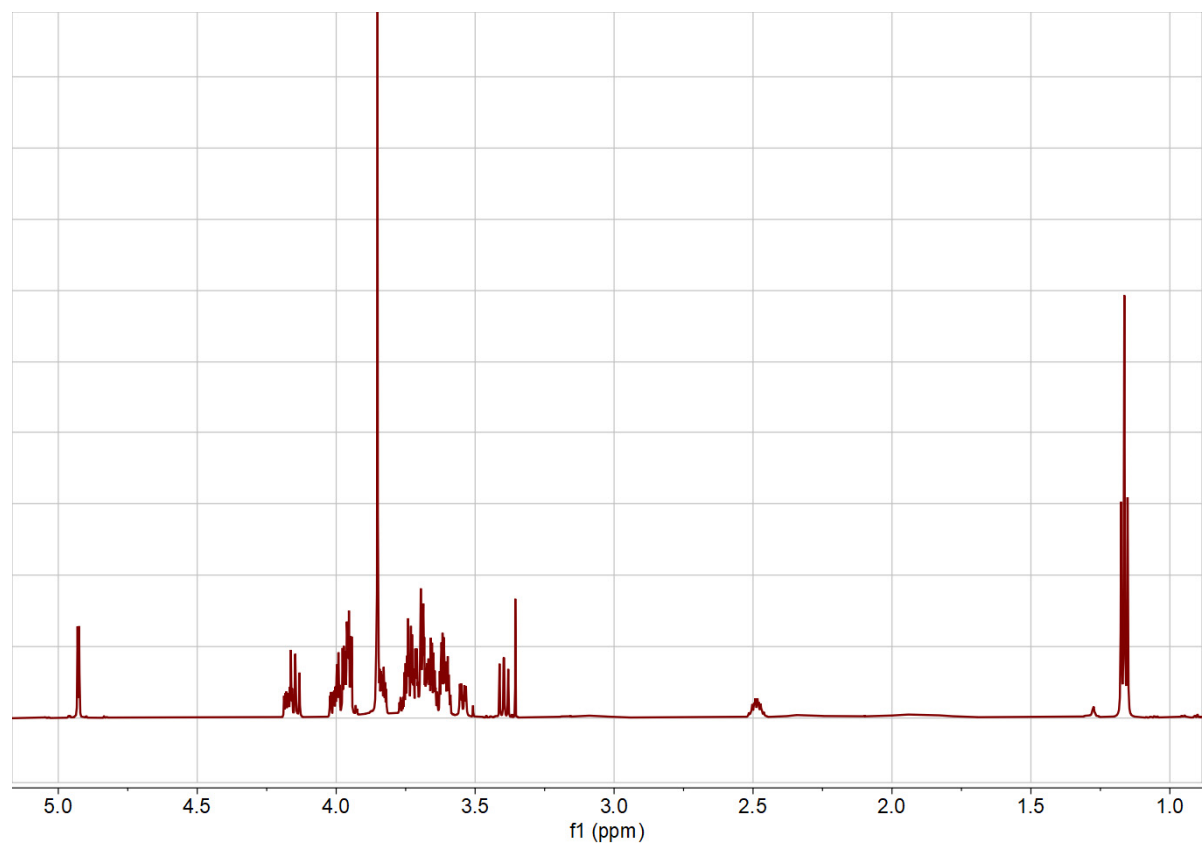

2D COSY NMR spectrum

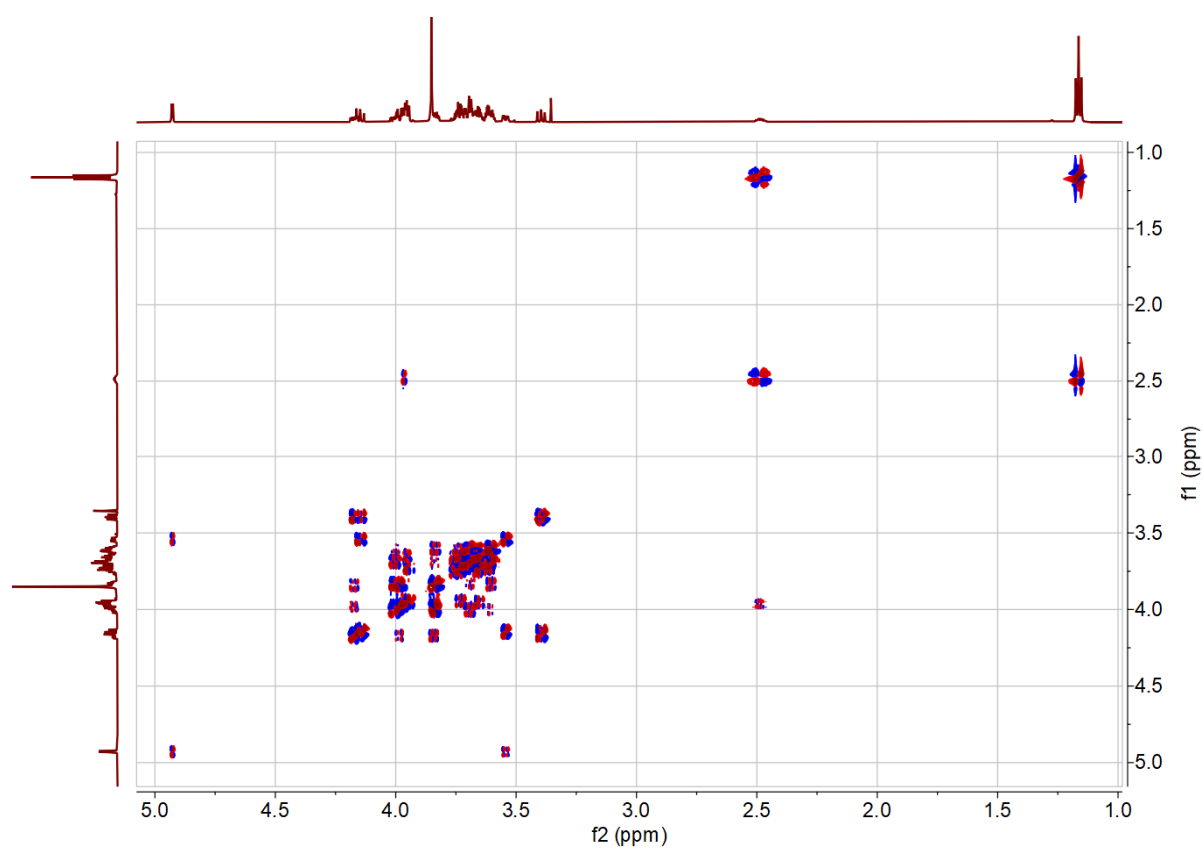

2D NOESY spectrum

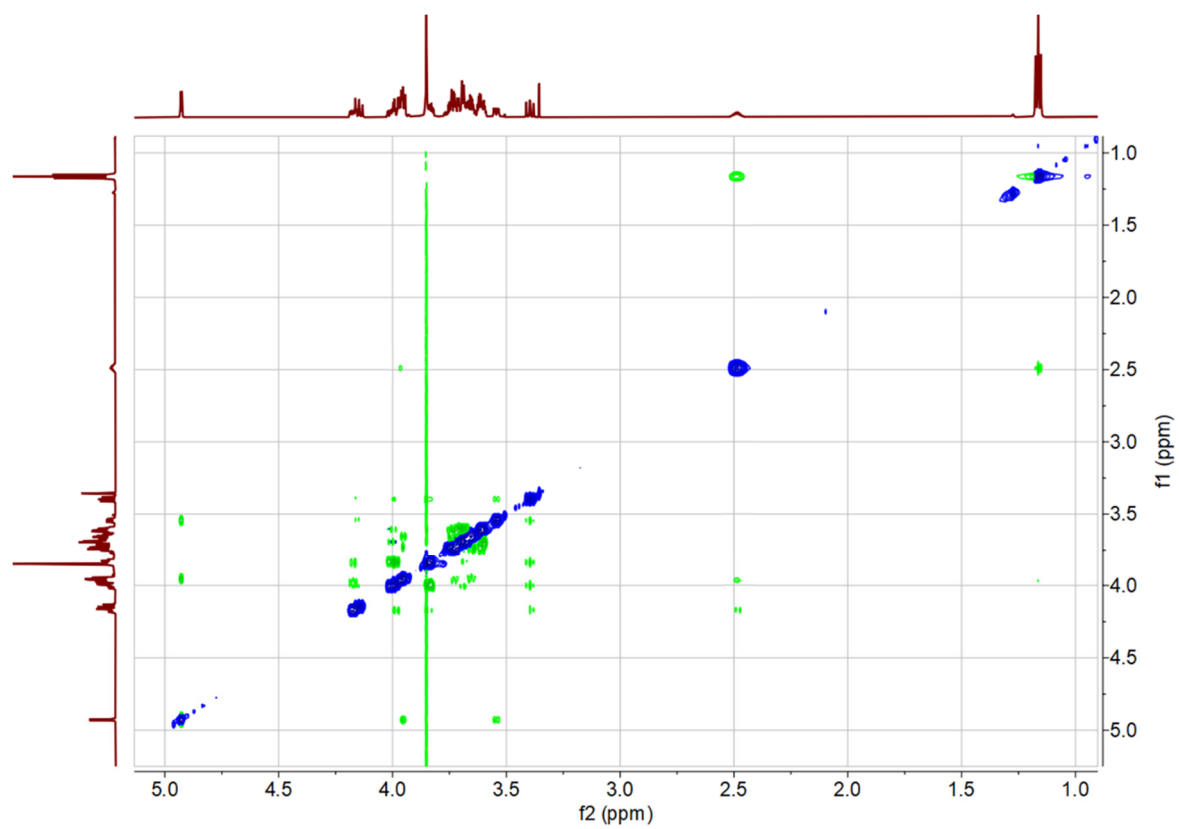

## 7. HR MS spectrum of receptor 1.

### Acquisition Parameter

Method: ETH\_HyStar\_HPLC\_QTOF\_POS\_LowMass\_Loop-AS.m  
 File Name: D:\Data\lmax0115xx\BMAX011597.d  
 Source Type: ESI  
 Focus: Not active  
 Scan Begin: 50 m/z  
 Scan End: 1300 m/z  
 Ion Polarity: Positive  
 Set Capillary: 4500 V  
 Set End Plate Offset: -500 V  
 Set Collision Cell RF: 200.0 Vpp

Acquisition Date: 08.04.2021 12:25:55  
 Operator: Daniel Wirz

Set Nebulizer: 1.6 Bar  
 Set Dry Heater: 200 °C  
 Set Dry Gas: 8.0 l/min  
 Set Divert Valve: Source

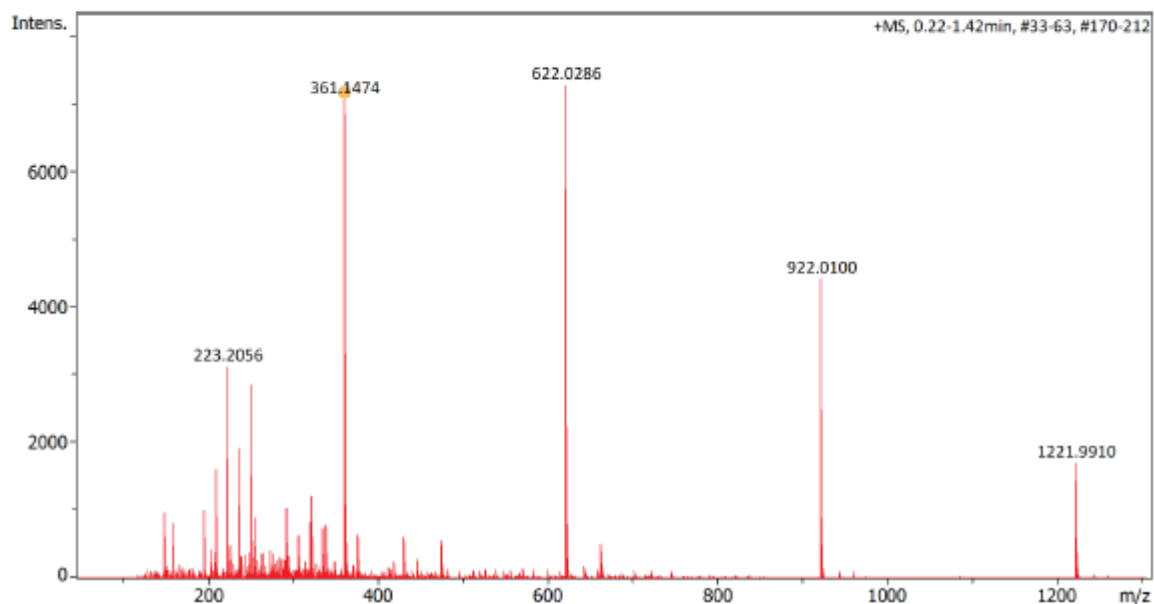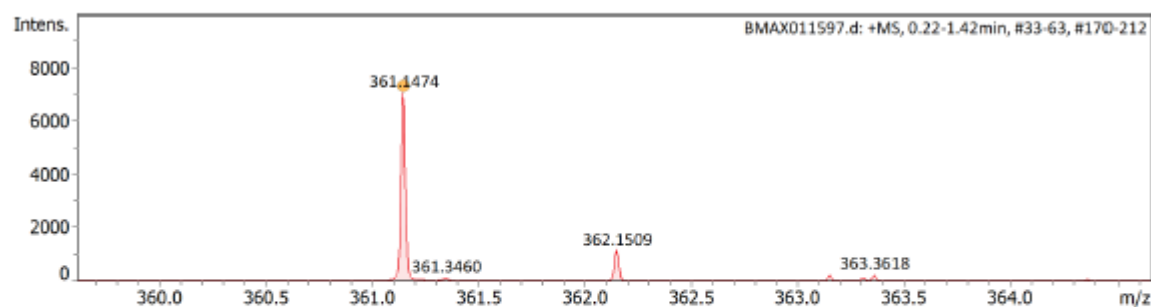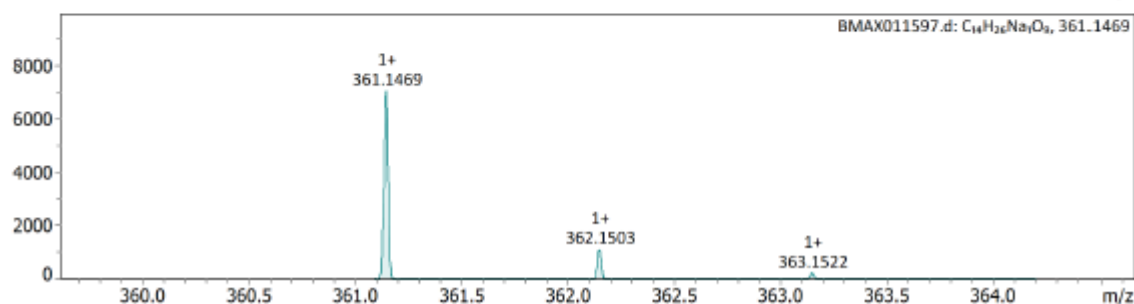

### Evaluation Spectra / Validation Formula:

| # | Ion Formula                                      | Adduct | m/z      | z  | Meas. m/z | mSigma | N-Rule | err [mDa] | err [ppm] |
|---|--------------------------------------------------|--------|----------|----|-----------|--------|--------|-----------|-----------|
| 1 | C <sub>14</sub> H <sub>26</sub> NaO <sub>9</sub> | M+Na   | 361.1469 | 1+ | 361.1474  | 1.7    | ok     | -0.5      | -1.3      |
